# Supplementary material
Source: Royal Society of Chemistry journal article supplement (doi:10.1039/d6cc01590e)
Supplement: d6cc01590e1.pdf [file d6cc01590e1.pdf]

## Supporting Information

### Three-component assembly of 2,3-disubstituted benzo[*e*]indoles from 1,2-diketones, 2-tetralones, and NH<sub>4</sub>OAc

#### Table of Contents

|                                                                      |    |
|----------------------------------------------------------------------|----|
| 1. General information.....                                          | 1  |
| 2. Experimental section.....                                         | 1  |
| 3. Characterization data of products.....                            | 3  |
| 4. The X-ray single-crystal diffraction analysis of product 3bv..... | 16 |
| 5. Copies of NMR spectra .....                                       | 21 |
| 6. UV-vis absorption and fluorescence emission spectra .....         | 60 |
| 7. HRMS of the imine/enamine intermediate .....                      | 66 |

## 1. General information

All reactions were carried out in well-cleaned and oven-dried glassware with magnetic stirring in an oil bath. All chemical reagents were used as received from commercial suppliers (Adamas and Bide) without further purification. Thin layer chromatography was performed using silica gel (HSGF254) using UV light for detection. The products were isolated by column chromatography (200–300 mesh silica gel) using petroleum ether and ethyl acetate as the eluent.  $^1\text{H}$  NMR and  $^{13}\text{C}\{^1\text{H}\}$  NMR spectra were recorded on Bruker-AV (400 and 101 MHz, respectively) instrument using chloroform-*d* or DMSO-*d*<sub>6</sub> as solvent and TMS as an internal standard. To display multiplicities and signal forms correctly, the following abbreviations were used: s = singlet, d = doublet, t = triplet, q = quartet, m = multiplet. Chemical shifts ( $\delta$ ) were given in parts per million (ppm), and coupling constants (*J*) were reported in hertz (Hz). High-resolution mass spectra (ESI) were obtained with the Agilent Technologies QTOF6550.

## 2. Experimental section

### 2.1 General procedure for the synthesis of products 3.

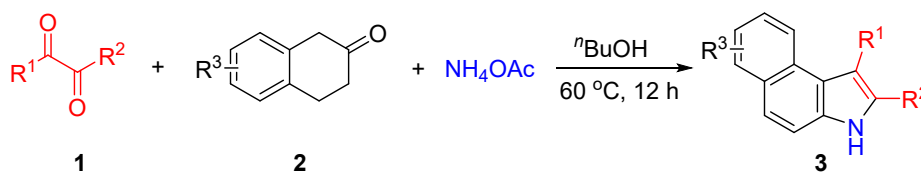

An oven-dried vial equipped with a magnetic stirring bar was charged with 1,2-diketone **1** (0.2 mmol), 2-tetralone **2** (0.5 mmol),  $\text{NH}_4\text{OAc}$  (0.6 mmol) and *n*BuOH (1 mL). The vial was then sealed and placed into an oil bath. The reaction mixture was stirred at 60 °C for 12 h. After the reaction was completed, the mixture was cooled to room temperature and filtered through a pad of silica gel by washing with ethyl acetate. The filtrate was concentrated under reduced pressure and the residue was purified by column chromatography (silica gel, PE/EA) to yield the desired product **3**.

### 2.2 Procedure for the gram-scale synthesis of product 3ae.

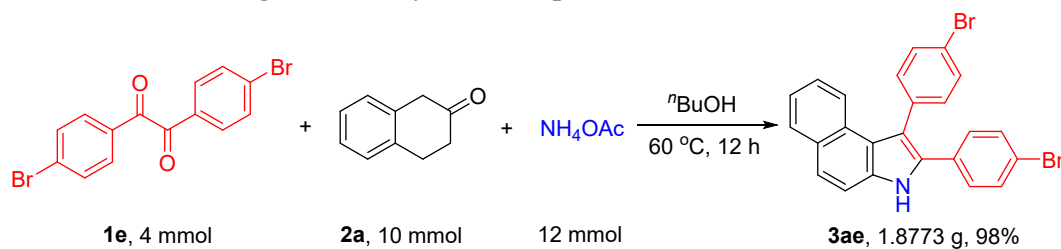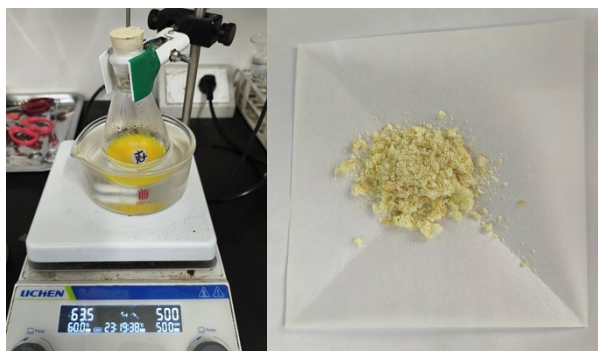

An oven-dried 100 mL round-bottom flask equipped with a magnetic stirring bar was charged with **1e** (4 mmol), **2a** (10 mmol), NH<sub>4</sub>OAc (12 mmol) and <sup>n</sup>BuOH (20 mL). The flask was then sealed and placed into an oil bath. The reaction mixture was stirred at 60 °C for 12 h. After the reaction was completed, the mixture was cooled to room temperature and filtered through a pad of silica gel by washing with ethyl acetate. The filtrate was concentrated under reduced pressure and the residue was purified by column chromatography (silica gel, PE/EA = 95:5) to yield the desired product **3ae** (1.8773 g, 98% yield).

### 2.3 Procedure for the synthesis of compound 4a.

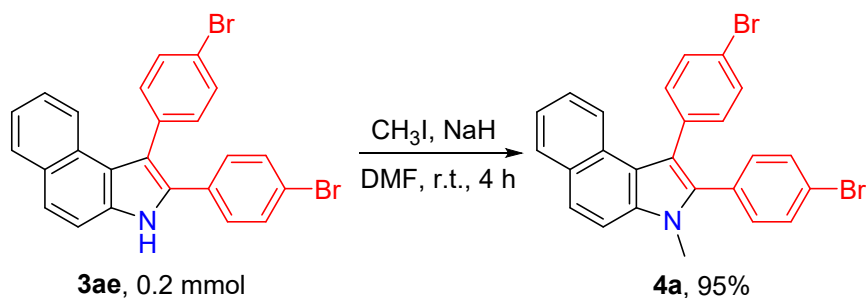

To a solution of **3ae** (0.2 mmol) in DMF (2.0 mL) was added NaH (0.3 mmol, 1.5 equiv) at 0 °C. After 10 min, CH<sub>3</sub>I was added and the mixture was stirred at r.t. for 4 h. The reaction was quenched by NH<sub>4</sub>Cl solution, extracted with EA (2×30 mL) and dried (MgSO<sub>4</sub>). The combined extracts were concentrated under vacuum and purified by column chromatography on silica gel with PE/EA = 95:5, affording product **4a** as a white solid in 95% yield (93.3 mg).

### 2.4 Procedure for the synthesis of compound 4b.

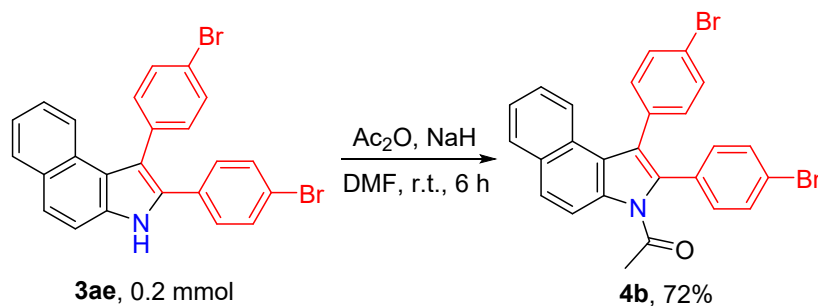

To a solution of **3ae** (0.2 mmol) in DMF (2.0 mL) was added NaH (0.3 mmol, 1.5 equiv) at 0 °C. After 10 min, Ac<sub>2</sub>O was added and the mixture was stirred at r.t. for 6 h. The reaction was quenched by NH<sub>4</sub>Cl solution, extracted with EA (2×30 mL) and dried (MgSO<sub>4</sub>). The combined extracts were concentrated under vacuum and purified by column chromatography on silica gel with PE/EA = 95:5, affording product **4b** as a white solid in 72% yield (74.8 mg).

### 3. Characterization data of products

#### 1,2-di-*p*-tolyl-3*H*-benzo[*e*]indole (3aa)

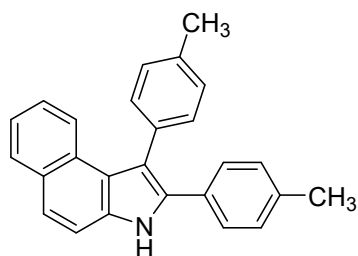

**Yield:** 62.2 mg, 90% (yellow liquid, PE/EA = 95:5). **<sup>1</sup>H NMR** (400 MHz, CDCl<sub>3</sub>) δ 8.55 (s, 1H), 7.89 (d, *J* = 8.1 Hz, 1H), 7.78 (dd, *J* = 8.4, 2.4 Hz, 1H), 7.63 (d, *J* = 8.8 Hz, 1H), 7.55 (d, *J* = 8.8 Hz, 1H), 7.40 (d, *J* = 8.0 Hz, 2H), 7.37–7.31 (m, 1H), 7.31–7.21 (m, 5H), 7.09 (d, *J* = 8.0 Hz, 2H), 2.49 (s, 3H), 2.33 (s, 3H). **<sup>13</sup>C{<sup>1</sup>H} NMR** (101 MHz, CDCl<sub>3</sub>) δ 136.9, 136.7, 134.2, 132.9, 132.2, 131.4, 130.1, 130.1, 129.7, 129.4, 129.0, 128.9, 127.4, 125.4, 123.8, 123.4, 123.2, 122.2, 117.6, 112.5, 21.6, 21.3. **HRMS (ESI) m/z:** calcd. for C<sub>26</sub>H<sub>22</sub>N<sup>+</sup> (M+H)<sup>+</sup> 348.1747, found 348.1745.

#### 1,2-diphenyl-3*H*-benzo[*e*]indole (3ab)

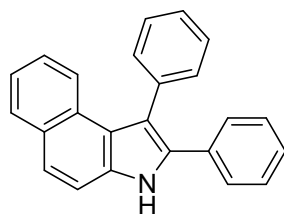

**Yield:** 59.5 mg, 93% (yellow liquid, PE/EA = 95:5). **<sup>1</sup>H NMR** (400 MHz, CDCl<sub>3</sub>) δ 8.46 (s, 1H), 7.78 (dd, *J* = 8.1, 1.4 Hz, 1H), 7.66–7.61 (m, 1H), 7.53 (d, *J* = 8.7 Hz, 1H), 7.45–7.34 (m, 6H), 7.26–7.11 (m, 7H). **<sup>13</sup>C{<sup>1</sup>H} NMR** (101 MHz, CDCl<sub>3</sub>) δ 137.3, 132.8, 132.7, 132.4, 131.6, 130.1, 128.9, 128.7, 127.6, 127.3, 127.2, 125.6, 124.1, 123.3, 122.1, 118.1, 112.6. **HRMS (ESI) m/z:** calcd. for C<sub>24</sub>H<sub>18</sub>N<sup>+</sup> (M+H)<sup>+</sup> 320.1434, found 320.1431.

#### 1,2-bis(4-fluorophenyl)-3*H*-benzo[*e*]indole (3ac)

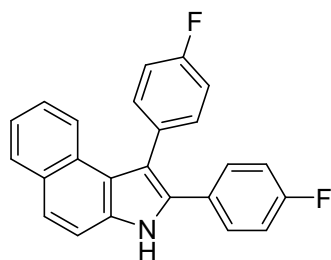

**Yield:** 47.3 mg, 67% (brown solid, PE/EA = 9:1). **<sup>1</sup>H NMR** (400 MHz, CDCl<sub>3</sub>) δ 8.57 (s, 1H), 7.89 (dd, *J* = 8.0, 1.4 Hz, 1H), 7.70 (dd, *J* = 8.4, 1.2 Hz, 1H), 7.65 (d, *J* = 8.8 Hz, 1H), 7.56 (d, *J* = 8.8 Hz, 1H), 7.48–7.42 (m, 2H), 7.38–7.33 (m, 1H), 7.29–7.25 (m, 3H), 7.18 (t, *J* = 8.7 Hz, 2H), 6.99 (t, *J* = 8.7 Hz, 2H). **<sup>13</sup>C{<sup>1</sup>H} NMR** (101 MHz, CDCl<sub>3</sub>) δ 163.5 (d, *J* = 32.0 Hz), 161.0 (d, *J* = 33.0 Hz), 133.1 (d, *J* = 8.0 Hz), 132.9 (d, *J* = 3.0 Hz), 132.3, 132.2, 130.2, 129.4 (d, *J* = 8.0 Hz), 129.0, 128.83 (d, *J* = 3.0 Hz), 128.76, 125.7, 124.3, 123.5, 123.1, 122.0, 116.8,

116.0 (d,  $J = 15.0$  Hz), 115.8 (d,  $J = 16.0$  Hz), 112.5. **HRMS (ESI) m/z**: calcd. for  $C_{24}H_{16}F_2N^+$  (M+H)<sup>+</sup> 356.1245, found 356.1247.

### 1,2-bis(4-chlorophenyl)-3*H*-benzo[*e*]indole (3ad)

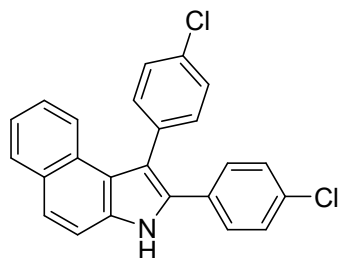

**Yield**: 63 mg, 81% (faint-yellow liquid, PE/EA = 95:5). **<sup>1</sup>H NMR** (400 MHz, CDCl<sub>3</sub>) δ 8.41 (s, 1H), 7.81–7.77 (m, 1H), 7.61 (dd,  $J = 8.3, 1.2$  Hz, 1H), 7.54 (d,  $J = 8.8$  Hz, 1H), 7.41 (d,  $J = 8.8$  Hz, 1H), 7.37–7.33 (m, 2H), 7.32–7.24 (m, 3H), 7.21–7.13 (m, 3H), 7.10 – 7.05 (m, 2H). **<sup>13</sup>C{<sup>1</sup>H} NMR** (101 MHz, CDCl<sub>3</sub>) δ 135.5, 133.5, 133.3, 132.8, 132.6, 131.8, 130.9, 130.2, 129.3, 129.1, 129.0, 128.8, 128.7, 125.8, 124.6, 123.6, 123.1, 121.8, 117.0, 112.5. **HRMS (ESI) m/z**: calcd. for  $C_{24}H_{16}Cl_2N^+$  (M+H)<sup>+</sup> 388.0654, found 388.0658.

### 1,2-bis(4-bromophenyl)-3*H*-benzo[*e*]indole (3ae)

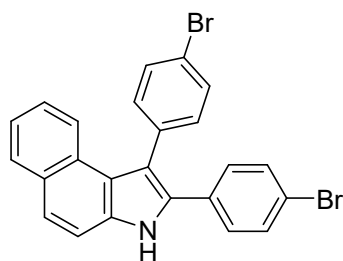

**Yield**: 81.1mg, 85% (yellow solid, PE/EA = 95:5). **<sup>1</sup>H NMR** (400 MHz, CDCl<sub>3</sub>) δ 8.43 (s, 1H), 7.92 (d,  $J = 8.0$  Hz, 1H), 7.75 (d,  $J = 8.4$  Hz, 1H), 7.66 (d,  $J = 8.8$  Hz, 1H), 7.61 (d,  $J = 8.4$  Hz, 2H), 7.49 (d,  $J = 8.8$  Hz, 1H), 7.41 (d,  $J = 8.4$  Hz, 3H), 7.34 (d,  $J = 8.4$  Hz, 3H), 7.08 (d,  $J = 8.4$  Hz, 2H). **<sup>13</sup>C{<sup>1</sup>H} NMR** (101 MHz, CDCl<sub>3</sub>) δ 135.9, 133.1, 132.6, 132.2, 131.9, 131.7, 131.3, 130.1, 129.1, 129.0, 128.6, 125.8, 124.6, 123.6, 123.1, 121.7, 121.7, 121.4, 117.0, 112.5. **HRMS (ESI) m/z**: calcd. for  $C_{24}H_{16}Br_2N^+$  (M+H)<sup>+</sup> 475.9644, found 475.9648.

### 1,2-bis(2-chlorophenyl)-3*H*-benzo[*e*]indole (3af)

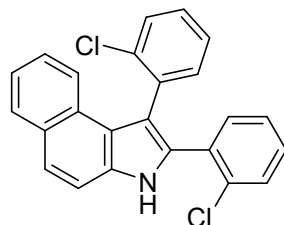

**Yield**: 58.4 mg, 75% (brown liquid, PE/EA = 95:5). **<sup>1</sup>H NMR** (400 MHz, CDCl<sub>3</sub>) δ 8.84 (s, 1H), 7.90 (d,  $J = 8.1$  Hz, 1H), 7.68 (d,  $J = 8.8$  Hz, 1H), 7.62–7.51 (m, 3H), 7.44 (d,  $J = 8.2$  Hz, 1H), 7.40–7.21 (m, 7H), 7.10 (t,  $J = 7.5$  Hz, 1H). **<sup>13</sup>C{<sup>1</sup>H} NMR** (101 MHz, CDCl<sub>3</sub>) δ 136.2, 135.8, 133.6, 133.5, 132.8, 132.2, 131.2, 131.0, 130.1, 130.0, 129.7, 129.4, 129.0, 128.8,

127.0, 126.8, 125.9, 124.4, 123.5, 122.9, 121.0, 116.5, 112.8. **HRMS (ESI) m/z:** calcd. for  $C_{24}H_{16}Cl_2N^+$  (M+H)<sup>+</sup> 388.0654, found 388.0652.

### 1,2-di(furan-2-yl)-3H-benzo[e]indole (3ag)

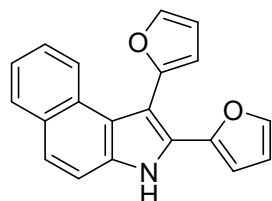

**Yield:** 26.1 mg, 43% (brown liquid, PE/EA = 95:5). **<sup>1</sup>H NMR** (400 MHz, CDCl<sub>3</sub>) δ 9.03 (s, 1H), 7.93–7.84 (m, 1H), 7.79–7.68 (m, 2H), 7.63 (d, *J* = 8.8 Hz, 1H), 7.53 (d, *J* = 8.7 Hz, 1H), 7.44 (dd, *J* = 1.8, 0.7 Hz, 1H), 7.41–7.34 (m, 2H), 6.69 (dd, *J* = 3.2, 1.9 Hz, 1H), 6.63 (dd, *J* = 3.2, 0.8 Hz, 1H), 6.42 (dd, *J* = 3.5, 1.8 Hz, 1H), 6.15 (dd, *J* = 3.4, 0.7 Hz, 1H). **<sup>13</sup>C{<sup>1</sup>H} NMR** (101 MHz, CDCl<sub>3</sub>) δ 148.5, 146.5, 142.7, 141.5, 132.1, 130.2, 128.9, 128.2, 127.7, 126.1, 124.6, 123.8, 123.2, 123.0, 112.5, 112.3, 111.6, 110.8, 107.0, 104.8. **HRMS (ESI) m/z:** calcd. for  $C_{20}H_{14}NO_2^+$  (M+H)<sup>+</sup> 300.1019, found 300.1015.

### 1,2-di(thiophen-2-yl)-3H-benzo[e]indole (3ah)

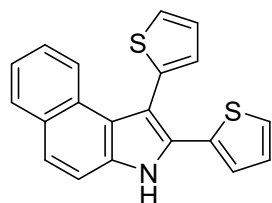

**Yield:** 44.1 mg, 66% (faint-yellow liquid, PE/EA = 9:1). **<sup>1</sup>H NMR** (400 MHz, CDCl<sub>3</sub>) δ 8.50 (s, 1H), 7.87 (dd, *J* = 8.0, 1.5 Hz, 1H), 7.73 (dd, *J* = 8.2, 1.3 Hz, 1H), 7.60 (d, *J* = 8.7 Hz, 1H), 7.53 (dd, *J* = 4.9, 3.0 Hz, 1H), 7.48 (d, *J* = 8.8 Hz, 1H), 7.38–7.27 (m, 3H), 7.25–7.20 (m, 2H), 7.06 (dd, *J* = 3.0, 1.4 Hz, 1H), 6.94 (dd, *J* = 5.1, 1.3 Hz, 1H). **<sup>13</sup>C{<sup>1</sup>H} NMR** (101 MHz, CDCl<sub>3</sub>) δ 136.9, 133.5, 132.0, 130.4, 130.1, 129.7, 128.9, 128.8, 126.3, 126.0, 126.0, 125.8, 124.7, 124.0, 123.5, 123.2, 122.5, 120.5, 112.5, 111.7. **HRMS (ESI) m/z:** calcd. for  $C_{20}H_{14}NS_2^+$  (M+H)<sup>+</sup> 332.0562, found 332.0561.

### 1,2-diethyl-3H-benzo[e]indole (3ai)

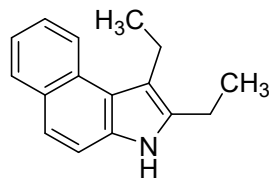

**Yield:** 32.5 mg, 73% (yellow liquid, PE/EA = 95:5). **<sup>1</sup>H NMR** (400 MHz, CDCl<sub>3</sub>) δ 8.41 (d, *J* = 8.4 Hz, 1H), 8.08 (s, 1H), 7.91 (dd, *J* = 8.1, 1.4 Hz, 1H), 7.57–7.51 (m, 2H), 7.45 (d, *J* = 8.7 Hz, 1H), 7.42–7.37 (m, 1H), 3.09 (q, *J* = 7.5 Hz, 2H), 2.85 (q, *J* = 7.6 Hz, 2H), 1.40–1.32 (m, 6H). **<sup>13</sup>C{<sup>1</sup>H} NMR** (101 MHz, CDCl<sub>3</sub>) δ 134.8, 131.7, 129.9, 129.0, 128.9, 125.5, 123.3, 122.6, 122.2, 121.0, 116.1, 112.6, 19.4, 19.3, 15.8, 14.9. **HRMS (ESI) m/z:** calcd. for  $C_{16}H_{18}N^+$  (M+H)<sup>+</sup> 224.1434, found 224.1435.

### 8,9,10,11-tetrahydro-7H-benzo[*c*]carbazole (3aj)

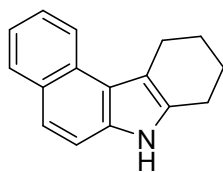

**Yield:** 27.1mg, 54% (yellow solid, PE/EA = 95:5). **<sup>1</sup>H NMR** (400 MHz, CDCl<sub>3</sub>) δ 8.38 (d, *J* = 8.3 Hz, 1H), 7.99 (s, 1H), 7.92 (dd, *J* = 8.1, 1.3 Hz, 1H), 7.57–7.50 (m, 2H), 7.45–7.37 (m, 2H), 3.21 (t, *J* = 5.6 Hz, 2H), 2.81 (t, *J* = 5.6 Hz, 2H), 2.04–1.92 (m, 4H). **<sup>13</sup>C{<sup>1</sup>H} NMR** (101 MHz, CDCl<sub>3</sub>) δ 132.4, 131.8, 129.7, 129.2, 128.7, 125.3, 123.7, 122.6, 121.9, 121.0, 112.6, 112.4, 24.4, 23.9, 23.7, 22.9. **HRMS (ESI) m/z:** calcd. for C<sub>16</sub>H<sub>16</sub>N<sup>+</sup> (M+H)<sup>+</sup> 222.1277, found 222.1278.

### 1-methyl-2-phenyl-3H-benzo[*e*]indole (3ak)

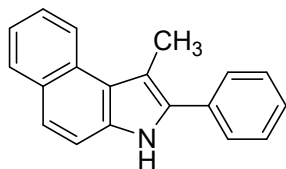

**Yield:** 23.3 mg, 45% (yellow liquid, PE/EA = 98:2). **<sup>1</sup>H NMR** (400 MHz, CDCl<sub>3</sub>) δ 8.60 (dd, *J* = 8.4, 1.1 Hz, 1H), 8.35 (s, 1H), 7.95 (dd, *J* = 8.0, 1.4 Hz, 1H), 7.64–7.48 (m, 7H), 7.47–7.36 (m, 2H), 2.85 (s, 3H). **<sup>13</sup>C{<sup>1</sup>H} NMR** (101 MHz, CDCl<sub>3</sub>) δ 133.4, 133.4, 132.6, 130.0, 129.8, 129.0, 129.0, 128.7, 127.5, 125.7, 123.6, 123.4, 123.0, 122.5, 112.7, 111.3, 13.4. **HRMS (ESI) m/z:** calcd. for C<sub>19</sub>H<sub>16</sub>N<sup>+</sup> (M+H)<sup>+</sup> 258.1277, found 258.1273.

### 2-methyl-1-phenyl-3H-benzo[*e*]indole (3ak')

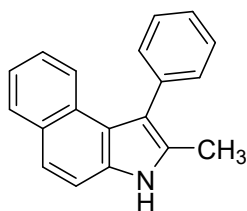

**Yield:** 23.6 mg, 45% (yellow liquid, PE/EA = 98:2). **<sup>1</sup>H NMR** (400 MHz, CDCl<sub>3</sub>) δ 8.26 (s, 1H), 7.92–7.81 (m, 2H), 7.60–7.41 (m, 7H), 7.35–7.30 (m, 1H), 7.27–7.21 (m, 1H), 2.36 (s, 3H). **<sup>13</sup>C{<sup>1</sup>H} NMR** (101 MHz, CDCl<sub>3</sub>) δ 137.3, 131.4, 131.3, 130.4, 129.9, 128.8, 128.5, 128.4, 126.9, 125.2, 123.3, 123.0, 122.6, 121.1, 117.4, 112.3, 12.1. **HRMS (ESI) m/z:** calcd. for C<sub>19</sub>H<sub>16</sub>N<sup>+</sup> (M+H)<sup>+</sup> 258.1277, found 258.1275.

### 8-methoxy-1,2-di-*p*-tolyl-3H-benzo[*e*]indole (3ba)

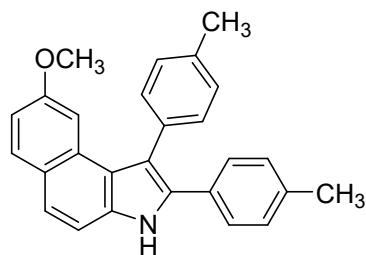

**Yield:** 70.6 mg, 94% (yellow liquid, PE/EA = 95:5). **<sup>1</sup>H NMR** (400 MHz, CDCl<sub>3</sub>) δ 8.49 (s, 1H), 7.79 (d, *J* = 8.9 Hz, 1H), 7.56 (d, *J* = 8.7 Hz, 1H), 7.45 (d, *J* = 8.0 Hz, 2H), 7.38 (d, *J* = 8.6 Hz, 1H), 7.30 (dd, *J* = 13.9, 8.0 Hz, 4H), 7.15–7.09 (m, 3H), 7.02 (dd, *J* = 8.9, 2.6 Hz, 1H), 3.50 (s, 3H), 2.48 (s, 3H), 2.35 (s, 3H). **<sup>13</sup>C{<sup>1</sup>H} NMR** (101 MHz, CDCl<sub>3</sub>) δ 157.3, 136.8, 136.7, 134.4, 132.6, 132.3, 131.7, 130.1, 130.0, 129.9, 129.5, 129.4, 127.2, 124.8, 123.5, 121.9, 117.3, 114.9, 110.1, 103.2, 54.7, 21.4, 21.3. **HRMS (ESI) m/z:** calcd. for C<sub>27</sub>H<sub>24</sub>NO<sup>+</sup> (M+H)<sup>+</sup> 378.1852 found 378.1853.

### 6-methoxy-1,2-di-*p*-tolyl-3*H*-benzo[*e*]indole (3bb)

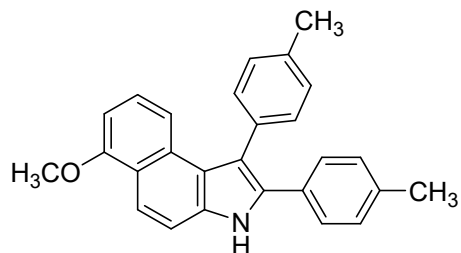

**Yield:** 41.9 mg, 56% (white solid, PE/EA = 95:5). **<sup>1</sup>H NMR** (400 MHz, CDCl<sub>3</sub>) δ 8.52 (s, 1H), 8.14 (d, *J* = 9.0 Hz, 1H), 7.53 (d, *J* = 9.1 Hz, 1H), 7.42–7.37 (m, 3H), 7.28 (d, *J* = 7.7 Hz, 2H), 7.23–7.16 (m, 3H), 7.09 (d, *J* = 8.0 Hz, 2H), 6.76 (d, *J* = 7.4 Hz, 1H). **<sup>13</sup>C{<sup>1</sup>H} NMR** (101 MHz, CDCl<sub>3</sub>) δ 156.1, 136.9, 136.7, 134.3, 132.9, 132.8, 131.4, 130.1, 130.0, 129.6, 129.4, 127.4, 125.6, 122.1, 121.3, 117.6, 117.3, 116.2, 111.6, 102.4, 55.6, 21.6, 21.3. **HRMS (ESI) m/z:** calcd. for C<sub>27</sub>H<sub>24</sub>NO<sup>+</sup> (M+H)<sup>+</sup> 378.1852, found 378.1853.

### 7-fluoro-1,2-di-*p*-tolyl-3*H*-benzo[*e*]indole (3bc)

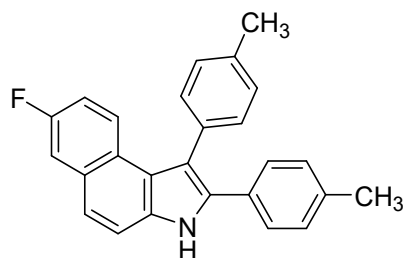

**Yield:** 66.1 mg, 90% (faint-yellow liquid, PE/EA = 95:5). **<sup>1</sup>H NMR** (400 MHz, CDCl<sub>3</sub>) δ 8.53 (s, 1H), 7.76 (dd, *J* = 9.2, 5.7 Hz, 1H), 7.61–7.48 (m, 3H), 7.38 (d, *J* = 7.7 Hz, 2H), 7.29 (d, *J* = 7.6 Hz, 2H), 7.22 (d, *J* = 8.2 Hz, 2H), 7.10 (d, *J* = 7.9 Hz, 2H), 7.03 (td, *J* = 8.8, 2.7 Hz, 1H), 2.50 (s, 3H), 2.33 (s, 3H). **<sup>13</sup>C{<sup>1</sup>H} NMR** (101 MHz, CDCl<sub>3</sub>) δ 159.1 (d, *J* = 240.0 Hz), 137.1, 136.9, 134.0, 133.3, 131.7 (d, *J* = 2.0 Hz), 131.3, 131.0 (d, *J* = 8.0 Hz), 129.9, 129.8, 129.5, 127.4, 125.7, 125.4 (d, *J* = 8.0 Hz), 122.8 (d, *J* = 4.0 Hz), 122.4, 117.2, 114.7 (d, *J* = 24.0 Hz),

113.7, 112.2 (d,  $J = 20.0$  Hz), 21.6, 21.3. **HRMS (ESI) m/z:** calcd. for  $C_{26}H_{21}FN^+$  (M+H)<sup>+</sup> 366.1653, found 366.1657.

#### 7-chloro-1,2-di-*p*-tolyl-3*H*-benzo[*e*]indole (3bd)

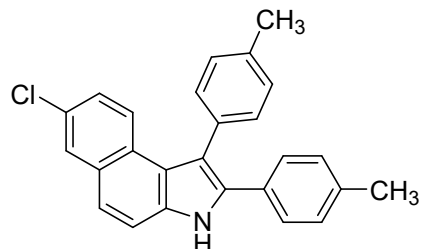

**Yield:** 49.7 mg, 65% (yellow solid, PE/EA = 95:5). **<sup>1</sup>H NMR** (400 MHz, CDCl<sub>3</sub>) δ 8.58 (s, 1H), 7.85 (d,  $J = 2.2$  Hz, 1H), 7.71 (d,  $J = 9.0$  Hz, 1H), 7.57–7.50 (m, 2H), 7.37 (d,  $J = 8.0$  Hz, 2H), 7.29 (d,  $J = 7.8$  Hz, 2H), 7.22 (d,  $J = 8.2$  Hz, 3H), 7.10 (d,  $J = 8.0$  Hz, 2H), 2.49 (s, 3H), 2.33 (s, 3H). **<sup>13</sup>C{<sup>1</sup>H} NMR** (101 MHz, CDCl<sub>3</sub>) δ 137.2, 137.0, 133.8, 133.4, 132.2, 131.2, 131.0, 129.8, 129.5, 128.7, 127.5, 127.4, 127.1, 125.9, 124.9, 122.7, 122.2, 117.4, 113.6, 21.6, 21.3. **HRMS (ESI) m/z:** calcd. for  $C_{26}H_{21}ClN^+$  (M+H)<sup>+</sup> 382.1357, found 382.1358.

#### 7-bromo-1,2-di-*p*-tolyl-3*H*-benzo[*e*]indole (3be)

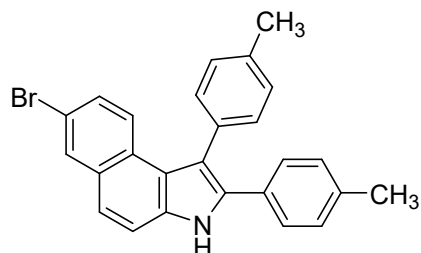

**Yield:** 48.3 mg, 57% (faint-yellow liquid, PE/EA = 95:5). **<sup>1</sup>H NMR** (400 MHz, CDCl<sub>3</sub>) δ 8.46 (s, 1H), 7.93 (d,  $J = 2.1$  Hz, 1H), 7.56 (d,  $J = 9.0$  Hz, 1H), 7.46–7.38 (m, 2H), 7.30–7.16 (m, 5H), 7.12 (d,  $J = 8.1$  Hz, 2H), 7.00 (d,  $J = 8.0$  Hz, 2H), 2.40 (s, 3H), 2.24 (s, 3H). **<sup>13</sup>C{<sup>1</sup>H} NMR** (101 MHz, CDCl<sub>3</sub>) δ 137.1, 137.0, 133.8, 133.4, 132.2, 131.5, 131.2, 130.7, 129.8, 129.7, 129.5, 128.4, 127.4, 127.3, 125.1, 122.6, 122.1, 117.4, 116.7, 113.6, 21.6, 21.3. **HRMS (ESI) m/z:** calcd. for  $C_{26}H_{21}BrN^+$  (M+H)<sup>+</sup> 426.0852, found 426.0855.

#### 8-bromo-1,2-di-*p*-tolyl-3*H*-benzo[*e*]indole (3bf)

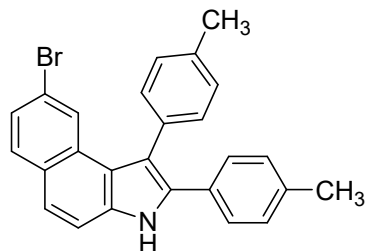

**Yield:** 44.5 mg, 52% (brown liquid, PE/EA = 98:2). **<sup>1</sup>H NMR** (400 MHz, CDCl<sub>3</sub>) δ 8.56 (s, 1H), 7.91 (d,  $J = 1.9$  Hz, 1H), 7.73 (d,  $J = 8.6$  Hz, 1H), 7.57–7.51 (m, 2H), 7.41 (dd,  $J = 8.6$ , 2.0 Hz, 1H), 7.38 (d,  $J = 8.0$  Hz, 2H), 7.31 (d,  $J = 7.8$  Hz, 2H), 7.23 (d,  $J = 8.1$  Hz, 2H), 7.10

(d,  $J = 8.0$  Hz, 2H).  $^{13}\text{C}\{^1\text{H}\}$  NMR (101 MHz,  $\text{CDCl}_3$ )  $\delta$  137.2, 137.1, 133.4, 133.2, 132.6, 131.1, 130.3, 130.1, 129.8, 129.5, 128.5, 127.4, 126.4, 125.9, 123.3, 121.4, 119.5, 117.5, 112.9, 21.6, 21.3. HRMS (ESI)  $m/z$ : calcd. for  $\text{C}_{26}\text{H}_{21}\text{BrN}^+$  ( $\text{M}+\text{H}$ ) $^+$  426.0852, found 426.0855.

### 1,2-bis(4-fluorophenyl)-8-methoxy-3H-benzo[e]indole (3bg)

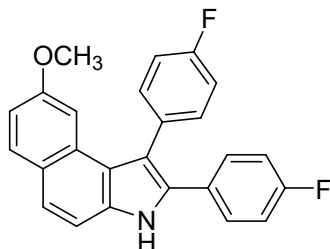

**Yield:** 59.0 mg, 61% (yellow solid, PE/EA = 95:5).  $^1\text{H}$  NMR (400 MHz,  $\text{CDCl}_3$ )  $\delta$  8.29 (s, 1H), 7.57 (d,  $J = 9.1$  Hz, 1H), 7.36 (d,  $J = 8.7$  Hz, 1H), 7.30–7.24 (m, 2H), 7.17 (dt,  $J = 8.8, 2.0$  Hz, 1H), 7.08–7.03 (m, 2H), 6.97 (t,  $J = 8.5$  Hz, 2H), 6.87–6.75 (m, 4H), 3.30 (d,  $J = 1.7$  Hz, 3H).  $^{13}\text{C}\{^1\text{H}\}$  NMR (101 MHz,  $\text{CDCl}_3$ )  $\delta$  163.4 (d,  $J = 31.0$  Hz), 161.0 (d,  $J = 32.0$  Hz), 157.5, 133.4 (d,  $J = 8.0$  Hz), 133.1 (d,  $J = 3.0$  Hz), 132.8, 131.7, 130.4, 129.8, 129.2 (d,  $J = 8.0$  Hz), 128.8 (d,  $J = 4.0$  Hz), 124.9, 124.0, 121.5, 116.5, 115.9 (d,  $J = 4.0$  Hz), 115.7 (d,  $J = 4.0$  Hz), 115.1, 110.1, 103.0, 54.8. HRMS (ESI)  $m/z$ : calcd. for  $\text{C}_{25}\text{H}_{18}\text{F}_2\text{NO}^+$  ( $\text{M}+\text{H}$ ) $^+$  386.1351, found 386.1354.

### 7-bromo-1,2-bis(4-fluorophenyl)-3H-benzo[e]indole (3bh)

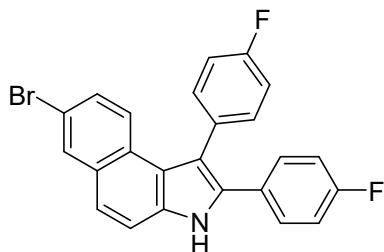

**Yield:** 77.7 mg, 84% (white solid, PE/EA = 95:5).  $^1\text{H}$  NMR (400 MHz,  $\text{DMSO}-d_6$ )  $\delta$  12.17 (s, 1H), 8.14 (d,  $J = 2.1$  Hz, 1H), 7.72 (d,  $J = 8.8$  Hz, 1H), 7.60 (d,  $J = 8.9$  Hz, 1H), 7.47–7.30 (m, 8H), 7.17 (t,  $J = 8.9$  Hz, 2H).  $^{13}\text{C}\{^1\text{H}\}$  NMR (101 MHz,  $\text{DMSO}-d_6$ )  $\delta$  162.7 (d,  $J = 35.0$  Hz), 160.2 (d,  $J = 36.0$  Hz), 133.1 (d,  $J = 3.0$  Hz), 133.0 (d,  $J = 8.0$  Hz), 132.6 (d,  $J = 10.0$  Hz), 131.1, 130.6, 129.5 (d,  $J = 8.0$  Hz), 128.7 (d,  $J = 3.0$  Hz), 127.8, 126.7, 124.1, 122.1, 120.7, 116.1 (d,  $J = 21.0$  Hz), 115.6, 115.6, 115.4, 115.2, 114.7. HRMS (ESI)  $m/z$ : calcd. for  $\text{C}_{24}\text{H}_{15}\text{BrF}_2\text{N}^+$  ( $\text{M}+\text{H}$ ) $^+$  434.0350, found 434.0351.

### 1,2-bis(4-chlorophenyl)-8-methoxy-3H-benzo[e]indole (3bi)

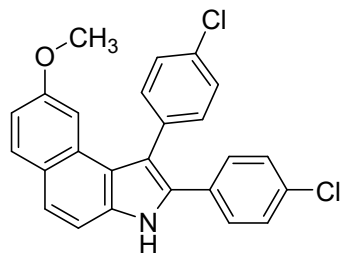

**Yield:** 41.9 mg, 50% (yellow solid, PE/EA = 95:5). **<sup>1</sup>H NMR** (400 MHz, CDCl<sub>3</sub>) δ 8.53 (s, 1H), 7.77 (d, *J* = 9.3 Hz, 1H), 7.58 (d, *J* = 8.6 Hz, 1H), 7.50–7.36 (m, 5H), 7.24 (d, *J* = 9.1 Hz, 4H), 7.06–6.95 (m, 2H), 3.51 (s, 3H). **<sup>13</sup>C{<sup>1</sup>H} NMR** (101 MHz, CDCl<sub>3</sub>) δ 157.6, 135.6, 133.5, 133.2, 133.1, 131.3, 131.0, 130.4, 129.7, 129.1, 129.1, 128.7, 124.9, 124.4, 121.4, 116.8, 115.2, 110.1, 103.1, 54.8. **HRMS (ESI) m/z:** calcd. for C<sub>25</sub>H<sub>18</sub>Cl<sub>2</sub>NO<sup>+</sup> (M+H)<sup>+</sup> 418.0760, found 418.0762.

### 1,2-bis(4-chlorophenyl)-6-methoxy-3H-benzo[e]indole (3bj)

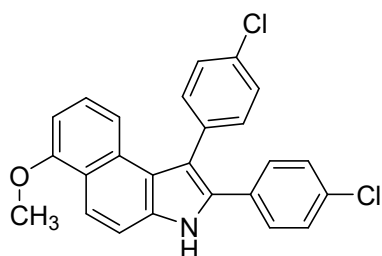

**Yield:** 46.3 mg, 54% (faint-yellow solid, PE/EA = 95:5). **<sup>1</sup>H NMR** (400 MHz, CDCl<sub>3</sub>) δ 8.52 (d, *J* = 3.4 Hz, 1H), 8.16 (d, *J* = 9.1 Hz, 1H), 7.53–7.47 (m, 1H), 7.47–7.42 (m, 2H), 7.41–7.37 (m, 2H), 7.32–7.28 (m, 1H), 7.26–7.14 (m, 5H), 6.78 (dd, *J* = 7.7, 1.0 Hz, 1H), 4.01 (s, 3H). **<sup>13</sup>C{<sup>1</sup>H} NMR** (101 MHz, CDCl<sub>3</sub>) δ 156.2, 135.5, 133.4, 133.2, 133.1, 132.9, 131.8, 131.0, 129.7, 129.2, 129.0, 128.8, 126.0, 121.7, 121.3, 118.1, 117.0, 115.9, 111.5, 102.8, 55.7. **HRMS (ESI) m/z:** calcd. for C<sub>25</sub>H<sub>18</sub>Cl<sub>2</sub>NO<sup>+</sup> (M+H)<sup>+</sup> 418.0760, found 418.0762.

### 7-bromo-1,2-bis(4-chlorophenyl)-3H-benzo[e]indole (3bk)

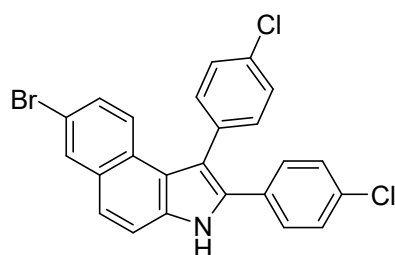

**Yield:** 57.2 mg, 62% (faint-brown solid, PE/EA = 95:5). **<sup>1</sup>H NMR** (400 MHz, CDCl<sub>3</sub>) δ 8.52 (s, 1H), 7.90 (d, *J* = 2.1 Hz, 1H), 7.46–7.39 (m, 3H), 7.34 (d, *J* = 8.4 Hz, 2H), 7.28–7.20 (m, 3H), 7.15 (d, *J* = 8.2 Hz, 2H), 7.07 (d, *J* = 8.8 Hz, 2H). **<sup>13</sup>C{<sup>1</sup>H} NMR** (101 MHz, CDCl<sub>3</sub>) δ 135.0, 133.7, 133.6, 132.7, 132.6, 132.4, 131.6, 131.0, 130.7, 129.4, 129.1, 128.9, 128.8, 127.1, 124.8, 123.5, 121.7, 117.1, 116.9, 113.6. **HRMS (ESI) m/z:** calcd. for C<sub>24</sub>H<sub>15</sub>BrCl<sub>2</sub>N<sup>+</sup> (M+H)<sup>+</sup> 465.9759, found 465.9755.

### 1,2-bis(2-chlorophenyl)-8-methoxy-3*H*-benzo[*e*]indole (3bl)

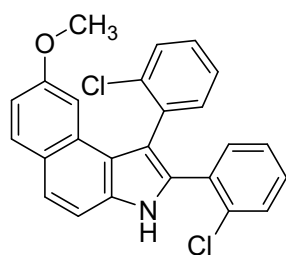

**Yield:** 53.5mg, 64% (faint yellow solid, PE/EA = 95:5). **<sup>1</sup>H NMR** (400 MHz, CDCl<sub>3</sub>) δ 8.68 (s, 1H), 7.66 (d, *J* = 8.8 Hz, 1H), 7.48 (d, *J* = 8.8 Hz, 1H), 7.42 (dd, *J* = 7.8, 1.5 Hz, 1H), 7.35–7.28 (m, 3H), 7.22–7.07 (m, 4H), 6.99 (td, *J* = 7.6, 1.3 Hz, 1H), 6.88 (dd, *J* = 8.8, 2.6 Hz, 1H), 6.81 (d, *J* = 2.6 Hz, 1H), 3.36 (s, 3H). **<sup>13</sup>C{<sup>1</sup>H} NMR** (101 MHz, CDCl<sub>3</sub>) δ 157.8, 136.5, 136.0, 133.9, 133.4, 132.8, 132.7, 131.2, 130.5, 130.1, 130.1, 129.9, 129.5, 129.4, 129.0, 126.9, 126.8, 124.7, 124.1, 120.6, 116.3, 115.1, 110.3, 102.5, 54.8. **HRMS (ESI) m/z:** calcd. for C<sub>25</sub>H<sub>18</sub>Cl<sub>2</sub>NO<sup>+</sup> (M+H)<sup>+</sup> 418.0760, found 418.0762.

### 7-bromo-1,2-bis(2-chlorophenyl)-3*H*-benzo[*e*]indole (3bm)

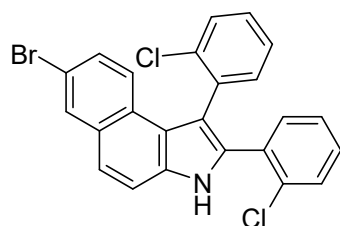

**Yield:** 57.9 mg, 62% (yellow liquid, PE/EA = 95:5). **<sup>1</sup>H NMR** (400 MHz, CDCl<sub>3</sub>) δ 8.69 (s, 1H), 7.92 (d, *J* = 2.1 Hz, 1H), 7.47–7.39 (m, 3H), 7.35–7.29 (m, 2H), 7.27–7.19 (m, 3H), 7.15–7.07 (m, 3H), 6.98 (t, *J* = 7.5 Hz, 1H). **<sup>13</sup>C{<sup>1</sup>H} NMR** (101 MHz, CDCl<sub>3</sub>) δ 136.1, 135.3, 133.4, 133.4, 132.8, 132.2, 131.5, 131.3, 130.9, 130.7, 130.1, 129.7, 129.6, 129.2, 128.9, 127.3, 127.1, 126.8, 124.6, 123.2, 120.9, 117.0, 116.4, 113.9. **HRMS (ESI) m/z:** calcd. for C<sub>24</sub>H<sub>15</sub>BrCl<sub>2</sub>N<sup>+</sup> (M+H)<sup>+</sup> 465.9759, found 465.9755.

### 1,2-bis(4-bromophenyl)-8-methoxy-3*H*-benzo[*e*]indole (3bn)

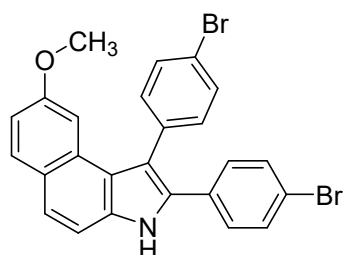

**Yield:** 84.4 mg, 84% (brown solid, PE/EA = 95:5). **<sup>1</sup>H NMR** (400 MHz, DMSO-*d*<sub>6</sub>) δ 12.04 (s, 1H), 7.79 (d, *J* = 8.9 Hz, 1H), 7.72–7.66 (m, 2H), 7.58–7.49 (m, 4H), 7.38 (d, *J* = 8.3 Hz, 2H), 7.32 (d, *J* = 8.6 Hz, 2H), 6.95 (dd, *J* = 8.8, 2.5 Hz, 1H), 6.85 (d, *J* = 2.6 Hz, 1H), 3.44 (s, 3H). **<sup>13</sup>C{<sup>1</sup>H} NMR** (101 MHz, DMSO-*d*<sub>6</sub>) δ 157.0, 136.7, 133.7, 133.5, 132.1, 131.7, 131.7, 131.1, 130.5, 129.4, 129.4, 124.4, 123.6, 120.9, 120.6, 120.4, 115.8, 113.9, 111.2, 103.0, 54.3. **HRMS (ESI) m/z:** calcd. for C<sub>25</sub>H<sub>18</sub>Br<sub>2</sub>NO<sup>+</sup> (M+H)<sup>+</sup> 505.9750, found 505.9753.

### 1,2-bis(4-bromophenyl)-6-methoxy-3*H*-benzo[*e*]indole (3bo)

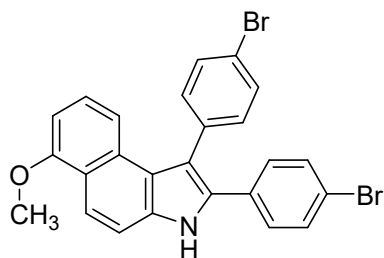

**Yield:** 46.6 mg, 46% (faint-yellow solid, PE/EA = 95:5). **<sup>1</sup>H NMR** (400 MHz, CDCl<sub>3</sub>) δ 8.45 (s, 1H), 8.07 (d, *J* = 9.1 Hz, 1H), 7.51 (d, *J* = 8.5 Hz, 2H), 7.41 (d, *J* = 9.1 Hz, 1H), 7.31 (d, *J* = 8.2 Hz, 2H), 7.27–7.17 (m, 3H), 7.13 (t, *J* = 8.1 Hz, 1H), 7.01 (d, *J* = 8.2 Hz, 2H), 6.89 (d, *J* = 7.8 Hz, 1H), 3.92 (s, 3H). **<sup>13</sup>C{<sup>1</sup>H} NMR** (101 MHz, CDCl<sub>3</sub>) δ 156.2, 136.0, 133.2, 133.2, 132.2, 132.0, 131.8, 131.4, 129.7, 129.1, 126.1, 121.6, 121.4, 121.3, 118.2, 117.1, 115.9, 111.5, 102.8, 55.7. **HRMS (ESI) *m/z*:** calcd. for C<sub>25</sub>H<sub>18</sub>Br<sub>2</sub>NO<sup>+</sup> (M+H)<sup>+</sup> 505.9750, found 505.9753.

### 1,2-bis(4-bromophenyl)-7-fluoro-3*H*-benzo[*e*]indole (3bp)

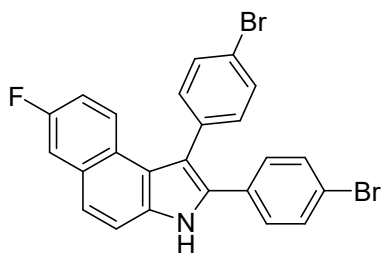

**Yield:** 78.4 mg, 80% (yellow liquid, PE/EA = 95:5). **<sup>1</sup>H NMR** (400 MHz, CDCl<sub>3</sub>) δ 8.60 (s, 1H), 7.68 (dd, *J* = 9.2, 5.6 Hz, 1H), 7.61 (d, *J* = 8.3 Hz, 2H), 7.57 (s, 2H), 7.51 (dd, *J* = 10.0, 2.7 Hz, 1H), 7.42 (d, *J* = 8.5 Hz, 2H), 7.33 (d, *J* = 8.3 Hz, 2H), 7.13 (d, *J* = 8.5 Hz, 2H), 7.09–7.02 (m, 1H). **<sup>13</sup>C{<sup>1</sup>H} NMR** (101 MHz, CDCl<sub>3</sub>) δ 159.3 (d, *J* = 242.0 Hz), 135.7, 133.1, 132.4, 132.2, 132.11 (d, *J* = 2.0 Hz), 132.06, 131.2, 131.1, 129.1, 125.4 (d, *J* = 1.0 Hz), 125.1 (d, *J* = 8.0 Hz), 123.7 (d, *J* = 4.0 Hz), 121.9, 121.8, 121.7, 116.7, 115.2 (d, *J* = 23.0 Hz), 113.7, 112.5 (d, *J* = 20.0 Hz). **HRMS (ESI) *m/z*:** calcd. for C<sub>24</sub>H<sub>15</sub>Br<sub>2</sub>FN<sup>+</sup> (M+H)<sup>+</sup> 493.9550, found 493.9551.

### 7-bromo-1,2-bis(4-bromophenyl)-3*H*-benzo[*e*]indole (3bq)

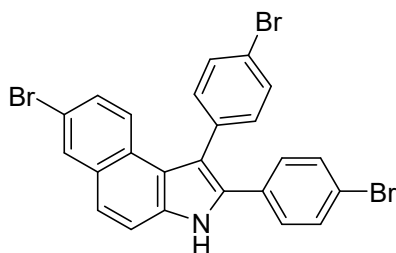

**Yield:** 95.4 mg, 86% (faint-yellow liquid, PE/EA = 95:5). **<sup>1</sup>H NMR** (400 MHz, CDCl<sub>3</sub>) δ 8.56 (s, 1H), 8.01 (d, *J* = 2.1 Hz, 1H), 7.62–7.51 (m, 5H), 7.41 (d, *J* = 8.5 Hz, 2H), 7.34 (dd, *J*

= 8.9, 2.1 Hz, 1H), 7.29 (d,  $J$  = 8.4 Hz, 2H), 7.10 (d,  $J$  = 8.6 Hz, 2H).  $^{13}\text{C}\{^1\text{H}\}$  NMR (101 MHz,  $\text{CDCl}_3$ )  $\delta$  135.5, 133.0, 132.6, 132.4, 132.3, 132.0, 131.6, 131.0, 130.9, 129.1, 128.8, 127.0, 124.7, 123.5, 121.9, 121.7, 121.6, 117.1, 116.8, 113.6. HRMS (ESI)  $m/z$ : calcd. for  $\text{C}_{24}\text{H}_{15}\text{Br}_3\text{N}^+(\text{M}+\text{H})^+$  553.8749, found 553.8746.

### 1,2-di(furan-2-yl)-8-methoxy-3H-benzo[e]indole (3br)

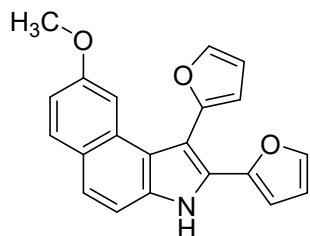

**Yield:** 34.8 mg, 53% (yellow solid, PE/EA = 95:5).  $^1\text{H}$  NMR (400 MHz,  $\text{CDCl}_3$ )  $\delta$  8.99 (s, 1H), 7.80–7.71 (m, 2H), 7.56 (d,  $J$  = 8.7 Hz, 1H), 7.43 (d,  $J$  = 1.7 Hz, 1H), 7.38 (d,  $J$  = 8.7 Hz, 1H), 7.09 (d,  $J$  = 2.6 Hz, 1H), 7.03 (dd,  $J$  = 8.8, 2.6 Hz, 1H), 6.69 (dd,  $J$  = 3.2, 1.9 Hz, 1H), 6.65 (d,  $J$  = 3.2 Hz, 1H), 6.42 (dd,  $J$  = 3.5, 1.8 Hz, 1H), 6.20 (d,  $J$  = 3.4 Hz, 1H), 3.70 (s, 3H).  $^{13}\text{C}\{^1\text{H}\}$  NMR (101 MHz,  $\text{CDCl}_3$ )  $\delta$  157.9, 148.7, 146.6, 142.7, 141.5, 132.5, 130.2, 129.3, 127.3, 125.0, 124.4, 122.5, 115.5, 112.2, 111.6, 110.9, 110.0, 106.8, 104.5, 102.7, 55.1. HRMS (ESI)  $m/z$ : calcd. for  $\text{C}_{21}\text{H}_{16}\text{NO}_3^+(\text{M}+\text{H})^+$  330.1125, found 330.1127.

### 1,2-di(furan-2-yl)-6-methoxy-3H-benzo[e]indole (3bs)

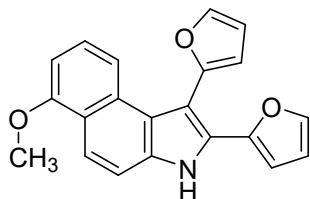

**Yield:** 30.9 mg, 47% (yellow liquid, PE/EA = 95:5).  $^1\text{H}$  NMR (400 MHz,  $\text{CDCl}_3$ )  $\delta$  9.01 (s, 1H), 8.14 (d,  $J$  = 9.0 Hz, 1H), 7.74 (dd,  $J$  = 1.9, 0.9 Hz, 1H), 7.50 (d,  $J$  = 9.1 Hz, 1H), 7.45–7.40 (m, 1H), 7.35–7.30 (m, 2H), 6.80 (dd,  $J$  = 5.4, 3.3 Hz, 1H), 6.69 (dd,  $J$  = 3.2, 1.9 Hz, 1H), 6.64–6.60 (m, 1H), 6.41 (dd,  $J$  = 3.4, 1.8 Hz, 1H), 6.13 (d,  $J$  = 3.4 Hz, 1H), 4.01 (s, 3H).  $^{13}\text{C}\{^1\text{H}\}$  NMR (101 MHz,  $\text{CDCl}_3$ )  $\delta$  156.2, 148.5, 146.5, 142.6, 141.5, 132.6, 129.3, 127.8, 126.3, 122.9, 121.4, 118.2, 115.7, 112.2, 111.5, 111.5, 110.8, 106.9, 104.8, 102.9, 55.6. HRMS (ESI)  $m/z$ : calcd. for  $\text{C}_{21}\text{H}_{16}\text{NO}_3^+(\text{M}+\text{H})^+$  330.1125, found 330.1127.

### 8-methoxy-1,2-dimethyl-3H-benzo[e]indole (3bt)

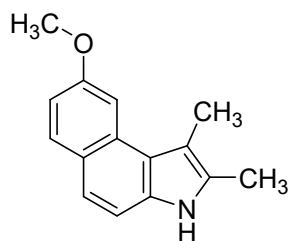

**Yield:** 18.5 mg, 41% (white solid, PE/EA = 95:5).  $^1\text{H}$  NMR (400 MHz,  $\text{CDCl}_3$ )  $\delta$  7.96 (s, 1H), 7.92 (d,  $J$  = 2.6 Hz, 1H), 7.82 (d,  $J$  = 8.9 Hz, 1H), 7.45 (d,  $J$  = 8.6 Hz, 1H), 7.26 (d,  $J$  = 8.5 Hz, 1H), 7.08 (dd,  $J$  = 8.9, 2.6 Hz, 1H), 3.99 (s, 3H), 2.64 (s, 3H), 2.41 (s, 3H).  $^{13}\text{C}\{^1\text{H}\}$

**NMR** (101 MHz, CDCl<sub>3</sub>)  $\delta$  157.6, 131.9, 130.3, 130.2, 128.7, 124.8, 121.9, 121.4, 113.4, 110.2, 109.5, 103.8, 55.4, 12.4, 11.6. **HRMS (ESI) m/z**: calcd. for C<sub>15</sub>H<sub>16</sub>NO<sup>+</sup> (M+H)<sup>+</sup> 226.1226, found 226.1228.

**1,2-diethyl-8-methoxy-3H-benzo[e]indole (3bu)**

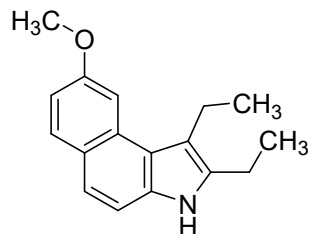

**Yield**: 18.4 mg, 36% (yellow liquid, PE/EA = 95:5). **<sup>1</sup>H NMR** (400 MHz, CDCl<sub>3</sub>)  $\delta$  8.03 (s, 1H), 7.84–7.79 (m, 2H), 7.47 (d, *J* = 8.7 Hz, 1H), 7.30 (d, *J* = 8.7 Hz, 1H), 7.08 (dd, *J* = 8.9, 2.5 Hz, 1H), 3.99 (s, 3H), 3.08 (q, *J* = 7.5 Hz, 2H), 2.83 (q, *J* = 7.6 Hz, 2H), 1.41 (t, *J* = 7.5 Hz, 3H), 1.33 (t, *J* = 7.6 Hz, 3H). **<sup>13</sup>C{<sup>1</sup>H} NMR** (101 MHz, CDCl<sub>3</sub>)  $\delta$  157.7, 134.4, 132.2, 130.3, 129.9, 124.8, 122.0, 120.5, 115.7, 113.6, 110.3, 103.7, 55.3, 19.4, 19.3, 15.9, 15.0. **HRMS (ESI) m/z**: calcd. for C<sub>17</sub>H<sub>20</sub>NO<sup>+</sup> (M+H)<sup>+</sup> 254.1539, found 254.1535.

**6-methoxy-1-methyl-2-phenyl-3H-benzo[e]indole (3bv)**

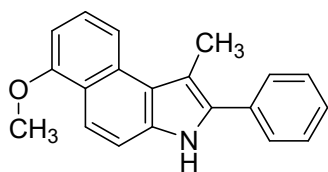

**Yield**: 27.6 mg, 48% (faint-yellow solid, PE/EA = 9:1). **<sup>1</sup>H NMR** (400 MHz, CDCl<sub>3</sub>)  $\delta$  8.31 (s, 1H), 8.21 (d, *J* = 8.4 Hz, 1H), 8.12 (d, *J* = 9.0 Hz, 1H), 7.62–7.55 (m, 2H), 7.55–7.47 (m, 4H), 7.44–7.35 (m, 1H), 6.86 (d, *J* = 7.6 Hz, 1H), 4.05 (s, 3H), 2.83 (s, 3H). **<sup>13</sup>C{<sup>1</sup>H} NMR** (101 MHz, CDCl<sub>3</sub>)  $\delta$  156.3, 133.4, 133.2, 130.9, 128.9, 128.8, 128.7, 127.4, 125.9, 122.4, 121.1, 117.1, 116.1, 111.7, 111.3, 102.3, 55.7, 13.4. **HRMS (ESI) m/z**: calcd. for C<sub>20</sub>H<sub>18</sub>NO<sup>+</sup> (M+H)<sup>+</sup> 288.1383, found 288.1381.

**6-methoxy-2-methyl-1-phenyl-3H-benzo[e]indole (3bv')**

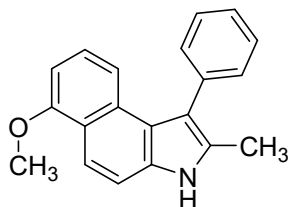

**Yield**: 27.8 mg, 48% (white solid, PE/EA = 9:1). **<sup>1</sup>H NMR** (400 MHz, CDCl<sub>3</sub>)  $\delta$  8.18 (s, 1H), 8.07 (d, *J* = 9.0 Hz, 1H), 7.54–7.40 (m, 7H), 7.17 (t, *J* = 8.1 Hz, 1H), 6.74 (d, *J* = 7.8 Hz, 1H), 4.01 (s, 3H), 2.33 (s, 3H). **<sup>13</sup>C{<sup>1</sup>H} NMR** (101 MHz, CDCl<sub>3</sub>)  $\delta$  156.1, 137.3, 132.0, 131.3, 130.5, 129.4, 128.4, 126.8, 125.3, 121.1, 121.0, 117.4, 116.2, 116.0, 111.4, 102.1, 55.6, 12.1. **HRMS (ESI) m/z**: calcd. for C<sub>20</sub>H<sub>18</sub>NO<sup>+</sup> (M+H)<sup>+</sup> 288.1383, found 288.1381.

### 7-bromo-1-methyl-2-phenyl-3H-benzo[e]indole (3bw)

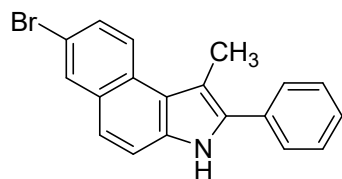

**Yield:** 24.3 mg, 36% (faint-yellow liquid, PE/EA = 95:5). **<sup>1</sup>H NMR** (400 MHz, CDCl<sub>3</sub>) δ 8.43 (d, *J* = 8.9 Hz, 1H), 8.38 (s, 1H), 8.07 (d, *J* = 2.1 Hz, 1H), 7.63 (dd, *J* = 8.9, 2.1 Hz, 1H), 7.59–7.48 (m, 6H), 7.43–7.37 (m, 1H), 2.79 (s, 3H). **<sup>13</sup>C{<sup>1</sup>H} NMR** (101 MHz, CDCl<sub>3</sub>) δ 134.0, 133.0, 132.6, 131.4, 130.9, 129.0, 128.7, 128.2, 127.7, 125.1, 122.5, 122.4, 116.5, 113.8, 111.1, 13.3. **HRMS (ESI) m/z:** calcd. for C<sub>19</sub>H<sub>15</sub>BrN<sup>+</sup> (M+H)<sup>+</sup> 336.0382, found 336.0384.

### 7-bromo-2-methyl-1-phenyl-3H-benzo[e]indole (3bw')

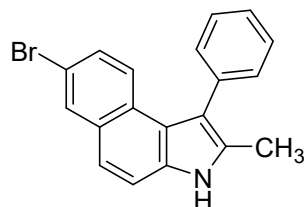

**Yield:** 24.9 mg, 37% (faint-yellow liquid, PE/EA = 95:5). **<sup>1</sup>H NMR** (400 MHz, CDCl<sub>3</sub>) δ 8.30 (s, 1H), 8.01 (d, *J* = 2.2 Hz, 1H), 7.70 (d, *J* = 9.0 Hz, 1H), 7.53–7.42 (m, 7H), 7.29 (dd, *J* = 9.0, 2.1 Hz, 1H), 2.36 (s, 3H). **<sup>13</sup>C{<sup>1</sup>H} NMR** (101 MHz, CDCl<sub>3</sub>) δ 136.8, 131.5, 131.3, 131.1, 131.1, 130.6, 128.7, 128.2, 127.1, 126.8, 125.0, 121.5, 121.1, 117.3, 116.5, 113.4, 12.1. **HRMS (ESI) m/z:** calcd. for C<sub>19</sub>H<sub>15</sub>BrN<sup>+</sup> (M+H)<sup>+</sup> 336.0382, found 336.0384.

### 1,2-bis(4-bromophenyl)-3-methyl-3H-benzo[e]indole (4a)

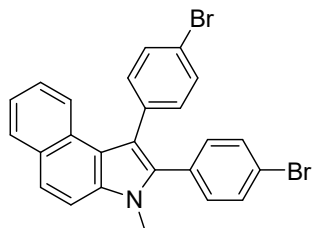

**Yield:** 93.3 mg, 95% (white solid, PE/EA = 95:5). **<sup>1</sup>H NMR** (400 MHz, CDCl<sub>3</sub>) δ 7.79 (d, *J* = 8.4 Hz, 1H), 7.70 (d, *J* = 8.3 Hz, 1H), 7.57 (d, *J* = 8.9 Hz, 1H), 7.44 (d, *J* = 8.8 Hz, 1H), 7.35 (dd, *J* = 10.0, 8.3 Hz, 4H), 7.28–7.22 (m, 1H), 7.20–7.15 (m, 1H), 7.11 (d, *J* = 8.3 Hz, 2H), 6.95 (d, *J* = 8.5 Hz, 2H), 3.63 (s, 3H). **<sup>13</sup>C{<sup>1</sup>H} NMR** (101 MHz, CDCl<sub>3</sub>) δ 135.8, 135.6, 133.8, 133.2, 132.7, 131.62, 131.58, 130.4, 130.0, 129.0, 128.5, 125.7, 123.9, 123.4, 123.2, 122.3, 121.0, 120.2, 117.1, 111.2, 31.5. **HRMS (ESI) m/z:** calcd. for C<sub>25</sub>H<sub>18</sub>Br<sub>2</sub>N<sup>+</sup> (M+H)<sup>+</sup> 489.9801, found 489.9805.

### 1-(1,2-bis(4-bromophenyl)-3H-benzo[e]indol-3-yl)ethan-1-one (4b)

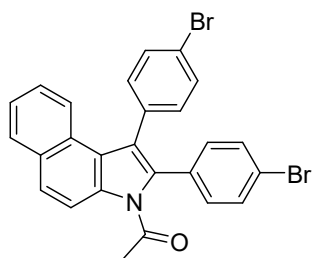

**Yield:** 74.8 mg, 72% (white solid, PE/EA = 95:5).  $^1\text{H NMR}$  (400 MHz,  $\text{CDCl}_3$ )  $\delta$  8.53 (d,  $J = 9.1$  Hz, 1H), 7.92 (d,  $J = 7.8$  Hz, 1H), 7.82 (d,  $J = 9.2$  Hz, 1H), 7.57 (d,  $J = 8.4$  Hz, 1H), 7.52 (d,  $J = 8.4$  Hz, 2H), 7.48–7.40 (m, 3H), 7.32–7.26 (m, 1H), 7.18 (d,  $J = 8.3$  Hz, 2H), 7.12 (d,  $J = 8.3$  Hz, 2H), 2.11 (s, 3H).  $^{13}\text{C}\{^1\text{H}\}$  NMR (101 MHz,  $\text{CDCl}_3$ )  $\delta$  171.8, 134.2, 133.7, 133.5, 132.7, 132.0, 131.9, 131.9, 131.6, 131.3, 128.8, 127.4, 126.7, 126.1, 124.7, 124.1, 123.5, 123.0, 122.5, 122.0, 115.6, 28.5. **HRMS (ESI) m/z:** calcd. for  $\text{C}_{26}\text{H}_{18}\text{Br}_2\text{NO}^+$  ( $\text{M}+\text{H}$ ) $^+$  517.9750, found 517.9752.

#### 4. The X-ray single-crystal diffraction analysis of product 3bv

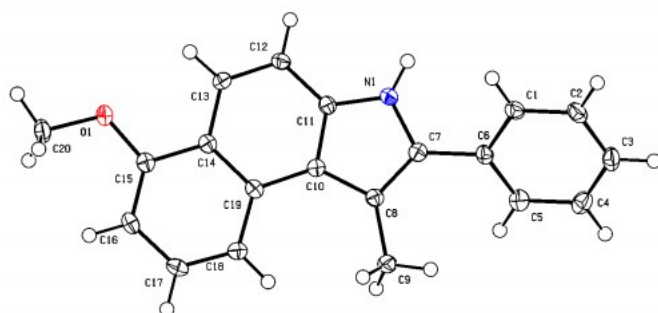

**Table 1** Crystal data and structure refinement for 3bv.

|                                  |                                       |
|----------------------------------|---------------------------------------|
| Empirical formula                | $\text{C}_{20}\text{H}_{17}\text{NO}$ |
| Formula weight                   | 287.35                                |
| Temperature/K                    | 100.00                                |
| Crystal system                   | orthorhombic                          |
| Space group                      | $\text{P2}_1\text{2}_1\text{2}_1$     |
| $a/\text{\AA}$                   | 7.9657(4)                             |
| $b/\text{\AA}$                   | 11.4669(5)                            |
| $c/\text{\AA}$                   | 15.8658(7)                            |
| $\alpha/^\circ$                  | 90                                    |
| $\beta/^\circ$                   | 90                                    |
| $\gamma/^\circ$                  | 90                                    |
| Volume/ $\text{\AA}^3$           | 1449.21(12)                           |
| Z                                | 4                                     |
| $\rho_{\text{calc}}/\text{cm}^3$ | 1.317                                 |
| $\mu/\text{mm}^{-1}$             | 0.081                                 |
| F(000)                           | 608.0                                 |
| Crystal size/ $\text{mm}^3$      | $0.15 \times 0.13 \times 0.12$        |

|                                                  |                                                               |
|--------------------------------------------------|---------------------------------------------------------------|
| Radiation                                        | MoK $\alpha$ ( $\lambda = 0.71073$ )                          |
| 2 $\Theta$ range for data collection/ $^{\circ}$ | 5.136 to 52.94                                                |
| Index ranges                                     | $-9 \leq h \leq 9, -14 \leq k \leq 14, -19 \leq l \leq 19$    |
| Reflections collected                            | 13384                                                         |
| Independent reflections                          | 2990 [ $R_{\text{int}} = 0.0513, R_{\text{sigma}} = 0.0444$ ] |
| Data/restraints/parameters                       | 2990/0/202                                                    |
| Goodness-of-fit on $F^2$                         | 1.044                                                         |
| Final R indexes [ $I \geq 2\sigma(I)$ ]          | $R_1 = 0.0335, wR_2 = 0.0834$                                 |
| Final R indexes [all data]                       | $R_1 = 0.0391, wR_2 = 0.0866$                                 |
| Largest diff. peak/hole / $e \text{ \AA}^{-3}$   | 0.18/-0.20                                                    |
| Flack parameter                                  | 1.6(18)                                                       |

**Table 2 Fractional Atomic Coordinates ( $\times 10^4$ ) and Equivalent Isotropic Displacement Parameters ( $\text{\AA}^2 \times 10^3$ ) for 3bv.  $U_{\text{eq}}$  is defined as 1/3 of the trace of the orthogonalised  $U_{ij}$  tensor.**

| Atom | x          | y           | z          | U(eq)   |
|------|------------|-------------|------------|---------|
| C1   | 10548(3)   | -128.8(18)  | 6868.3(12) | 18.7(4) |
| C2   | 11305(3)   | -1148.1(18) | 7144.4(13) | 21.7(5) |
| C3   | 10471(3)   | -2206.5(18) | 7070.8(13) | 23.2(5) |
| C4   | 8880(3)    | -2242.6(19) | 6712.3(13) | 23.1(5) |
| C5   | 8117(3)    | -1218.7(17) | 6442.4(13) | 20.3(4) |
| C6   | 8928(2)    | -147.4(17)  | 6522.2(12) | 16.2(4) |
| C7   | 8127(3)    | 954.3(16)   | 6268.7(12) | 16.2(4) |
| C8   | 6536(2)    | 1380.1(16)  | 6427.2(12) | 15.0(4) |
| C9   | 5173(3)    | 757.8(18)   | 6901.0(13) | 19.9(4) |
| C10  | 6507(2)    | 2556.9(16)  | 6104.9(12) | 14.1(4) |
| C11  | 8097(3)    | 2778.2(16)  | 5758.8(12) | 15.1(4) |
| C12  | 8539(2)    | 3842.1(17)  | 5376.4(13) | 17.1(4) |
| C13  | 7377(2)    | 4719.0(17)  | 5387.4(12) | 17.0(4) |
| C14  | 5749(2)    | 4561.3(17)  | 5748.9(12) | 15.1(4) |
| C15  | 4565(3)    | 5493.7(17)  | 5749.4(12) | 16.5(4) |
| C16  | 2956(3)    | 5333.5(17)  | 6038.0(13) | 19.0(4) |
| C17  | 2486(2)    | 4236.2(17)  | 6356.2(13) | 19.3(4) |
| C18  | 3597(2)    | 3326.9(17)  | 6391.4(12) | 17.1(4) |
| C19  | 5261(2)    | 3462.0(16)  | 6093.5(12) | 14.9(4) |
| C20  | 4102(3)    | 7516.8(18)  | 5498.6(14) | 23.5(5) |
| N1   | 9064(2)    | 1807.0(14)  | 5875.3(10) | 16.9(4) |
| O1   | 5184.4(18) | 6528.0(12)  | 5448.0(9)  | 21.2(3) |

**Table 3 Anisotropic Displacement Parameters ( $\text{\AA}^2 \times 10^3$ ) for 3bv. The Anisotropic displacement factor exponent takes the form:  $-2\pi^2[h^2a^{*2}U_{11}+2hka^*b^*U_{12}+\dots]$ .**

| Atom | U11      | U22      | U33      | U23     | U13      | U12     |
|------|----------|----------|----------|---------|----------|---------|
| C1   | 16.6(10) | 21.2(10) | 18.4(10) | 1.2(8)  | 3.7(8)   | 1.4(8)  |
| C2   | 17.2(10) | 27.7(11) | 20.3(10) | 3.4(9)  | 4.1(8)   | 6.5(9)  |
| C3   | 28.7(11) | 19.7(10) | 21.2(10) | 4.4(8)  | 7.6(9)   | 9.6(9)  |
| C4   | 31.2(12) | 16.9(10) | 21.2(11) | -0.4(8) | 4.7(9)   | -0.5(9) |
| C5   | 22.2(10) | 20.1(9)  | 18.5(10) | -1.5(8) | -0.4(9)  | 1.0(9)  |
| C6   | 18.1(10) | 17.1(9)  | 13.2(9)  | 0.1(8)  | 2.9(8)   | 3.8(8)  |
| C7   | 16.9(9)  | 16.5(9)  | 15.3(9)  | -0.6(7) | -1.8(8)  | -0.8(8) |
| C8   | 13.9(9)  | 17.2(9)  | 13.9(9)  | 0.5(7)  | -2.8(7)  | -0.8(7) |
| C9   | 15.7(9)  | 20.6(10) | 23.4(10) | 5.6(8)  | -0.6(8)  | -0.2(9) |
| C10  | 15.1(9)  | 15.9(9)  | 11.4(8)  | -0.5(7) | -1.3(7)  | -0.6(8) |
| C11  | 15.0(9)  | 15.9(9)  | 14.6(9)  | -0.8(7) | -1.1(8)  | 1.2(8)  |
| C12  | 13.8(9)  | 19.4(10) | 18.1(10) | 1.2(8)  | 3.0(8)   | 0.2(8)  |
| C13  | 16.9(9)  | 15.3(9)  | 18.9(10) | 1.4(8)  | 0.6(8)   | -2.2(8) |
| C14  | 15.0(9)  | 17.0(9)  | 13.4(9)  | -1.5(7) | -2.5(7)  | 0.5(8)  |
| C15  | 16.9(9)  | 17.1(9)  | 15.4(9)  | -1.6(8) | -2.4(8)  | 1.0(8)  |
| C16  | 16.1(9)  | 21.0(10) | 19.9(10) | -1.2(8) | -3.1(8)  | 5.2(8)  |
| C17  | 12.6(8)  | 26.6(10) | 18.6(10) | -1.0(8) | -0.4(8)  | -0.9(8) |
| C18  | 16.1(9)  | 18.9(9)  | 16.3(9)  | 0.5(8)  | 0.5(8)   | -1.6(8) |
| C19  | 14.9(9)  | 17.8(9)  | 12.0(9)  | -1.6(7) | -1.7(7)  | 1.2(8)  |
| C20  | 21.2(10) | 16.8(10) | 32.7(12) | -1.1(9) | -2.8(10) | 6.2(9)  |
| N1   | 13.9(8)  | 17.8(8)  | 19.0(9)  | 1.8(7)  | 2.7(7)   | 1.6(7)  |
| O1   | 19.0(7)  | 15.3(7)  | 29.4(8)  | 2.6(6)  | 0.9(6)   | 3.6(6)  |

**Table 4 Bond Lengths for 3bv.**

| Atom | Atom | Length/Å | Atom | Atom | Length/Å |
|------|------|----------|------|------|----------|
| C1   | C2   | 1.386(3) | C11  | C12  | 1.407(3) |
| C1   | C6   | 1.403(3) | C11  | N1   | 1.367(2) |
| C2   | C3   | 1.388(3) | C12  | C13  | 1.367(3) |
| C3   | C4   | 1.390(3) | C13  | C14  | 1.429(3) |
| C4   | C5   | 1.389(3) | C14  | C15  | 1.426(3) |
| C5   | C6   | 1.393(3) | C14  | C19  | 1.428(3) |
| C6   | C7   | 1.471(3) | C15  | C16  | 1.373(3) |
| C7   | C8   | 1.381(3) | C15  | O1   | 1.371(2) |
| C7   | N1   | 1.379(2) | C16  | C17  | 1.407(3) |
| C8   | C9   | 1.501(3) | C17  | C18  | 1.369(3) |
| C8   | C10  | 1.443(3) | C18  | C19  | 1.416(3) |
| C10  | C11  | 1.404(3) | C20  | O1   | 1.426(2) |
| C10  | C19  | 1.436(3) |      |      |          |

**Table 5 Bond Angles for 3bv.**

| Atom | Atom | Atom | Angle/°    | Atom | Atom | Atom | Angle/°    |
|------|------|------|------------|------|------|------|------------|
| C2   | C1   | C6   | 120.7(2)   | N1   | C11  | C10  | 107.98(16) |
| C1   | C2   | C3   | 120.16(19) | N1   | C11  | C12  | 128.56(18) |
| C2   | C3   | C4   | 119.78(19) | C13  | C12  | C11  | 117.55(17) |
| C5   | C4   | C3   | 120.0(2)   | C12  | C13  | C14  | 121.77(18) |
| C4   | C5   | C6   | 120.97(19) | C15  | C14  | C13  | 120.37(17) |
| C1   | C6   | C7   | 119.53(18) | C15  | C14  | C19  | 118.79(17) |
| C5   | C6   | C1   | 118.37(18) | C19  | C14  | C13  | 120.82(17) |
| C5   | C6   | C7   | 122.10(17) | C16  | C15  | C14  | 121.15(18) |
| C8   | C7   | C6   | 130.66(18) | O1   | C15  | C14  | 114.23(16) |
| N1   | C7   | C6   | 119.86(17) | O1   | C15  | C16  | 124.62(18) |
| N1   | C7   | C8   | 109.16(16) | C15  | C16  | C17  | 119.22(18) |
| C7   | C8   | C9   | 125.93(17) | C18  | C17  | C16  | 121.57(18) |
| C7   | C8   | C10  | 106.32(17) | C17  | C18  | C19  | 120.57(18) |
| C10  | C8   | C9   | 127.59(17) | C14  | C19  | C10  | 117.04(16) |
| C11  | C10  | C8   | 107.03(16) | C18  | C19  | C10  | 124.30(17) |
| C11  | C10  | C19  | 119.20(16) | C18  | C19  | C14  | 118.65(17) |
| C19  | C10  | C8   | 133.75(17) | C11  | N1   | C7   | 109.49(16) |
| C10  | C11  | C12  | 123.46(17) | C15  | O1   | C20  | 116.78(16) |

**Table 6 Torsion Angles for 3bv.**

| A  | B  | C   | D   | Angle/°     | A   | B   | C   | D   | Angle/°     |
|----|----|-----|-----|-------------|-----|-----|-----|-----|-------------|
| C1 | C2 | C3  | C4  | 0.6(3)      | C11 | C10 | C19 | C18 | 177.31(18)  |
| C1 | C6 | C7  | C8  | -132.6(2)   | C11 | C12 | C13 | C14 | -1.9(3)     |
| C1 | C6 | C7  | N1  | 40.1(3)     | C12 | C11 | N1  | C7  | -179.27(19) |
| C2 | C1 | C6  | C5  | -1.7(3)     | C12 | C13 | C14 | C15 | -179.94(18) |
| C2 | C1 | C6  | C7  | 177.33(18)  | C12 | C13 | C14 | C19 | -1.8(3)     |
| C2 | C3 | C4  | C5  | -1.1(3)     | C13 | C14 | C15 | C16 | 175.21(18)  |
| C3 | C4 | C5  | C6  | 0.2(3)      | C13 | C14 | C15 | O1  | -5.2(3)     |
| C4 | C5 | C6  | C1  | 1.1(3)      | C13 | C14 | C19 | C10 | 103.7(3)    |
| C4 | C5 | C6  | C7  | -177.85(19) | C13 | C14 | C19 | C18 | -175.70(17) |
| C5 | C6 | C7  | C8  | 46.4(3)     | C14 | C15 | C16 | C17 | 1.5(3)      |
| C5 | C6 | C7  | N1  | -140.87(19) | C14 | C15 | O1  | C20 | -174.89(16) |
| C6 | C1 | C2  | C3  | 0.9(3)      | C15 | C14 | C19 | C10 | -178.12(17) |
| C6 | C7 | C8  | C9  | -2.1(3)     | C15 | C14 | C19 | C18 | 2.5(3)      |
| C6 | C7 | C8  | C10 | 173.74(19)  | C15 | C16 | C17 | C18 | 0.5(3)      |
| C6 | C7 | N1  | C11 | -175.36(16) | C16 | C15 | O1  | C20 | 4.7(3)      |
| C7 | C8 | C10 | C11 | 0.5(2)      | C16 | C17 | C18 | C19 | -1.0(3)     |
| C7 | C8 | C10 | C19 | -178.2(2)   | C17 | C18 | C19 | C10 | -179.90(19) |

**Table 6 Torsion Angles for 3bv.**

| A   | B   | C   | D   | Angle/°    | A   | B   | C   | D   | Angle/°     |
|-----|-----|-----|-----|------------|-----|-----|-----|-----|-------------|
| C8  | C7  | N1  | C11 | -1.2(2)    | C17 | C18 | C19 | C14 | -0.6(3)     |
| C8  | C10 | C11 | C12 | 179.52(18) | C19 | C10 | C11 | C12 | -1.6(3)     |
| C8  | C10 | C11 | N1  | -1.2(2)    | C19 | C10 | C11 | N1  | 177.67(16)  |
| C8  | C10 | C19 | C14 | 176.46(19) | C19 | C14 | C15 | C16 | -3.0(3)     |
| C8  | C10 | C19 | C18 | -4.2(3)    | C19 | C14 | C15 | O1  | 176.59(17)  |
| C9  | C8  | C10 | C11 | 176.17(19) | N1  | C7  | C8  | C9  | -175.36(18) |
| C9  | C8  | C10 | C19 | -2.5(3)    | N1  | C7  | C8  | C10 | 0.4(2)      |
| C10 | C11 | C12 | C13 | 3.6(3)     | N1  | C11 | C12 | C13 | -175.53(19) |
| C10 | C11 | N1  | C7  | 1.5(2)     | O1  | C15 | C16 | C17 | -178.07(18) |
| C11 | C10 | C19 | C14 | -2.0(3)    |     |     |     |     |             |

**Table 7 Hydrogen Atom Coordinates ( $\text{\AA} \times 10^4$ ) and Isotropic Displacement Parameters ( $\text{\AA}^2 \times 10^3$ ) for 3bv.**

| Atom | x        | y        | z       | U(eq) |
|------|----------|----------|---------|-------|
| H1   | 11133.54 | 590.28   | 6913.91 | 22    |
| H2   | 12397.01 | -1122.41 | 7384.59 | 26    |
| H3   | 10986.83 | -2903.71 | 7264.81 | 28    |
| H4   | 8313.42  | -2966.95 | 6651.93 | 28    |
| H5   | 7027.87  | -1249.44 | 6199.96 | 24    |
| H9A  | 4258.35  | 560.47   | 6513.36 | 30    |
| H9B  | 4744.5   | 1264.81  | 7349.24 | 30    |
| H9C  | 5626.59  | 41.69    | 7149.7  | 30    |
| H12  | 9606.28  | 3947.02  | 5120.17 | 21    |
| H13  | 7658.15  | 5452.87  | 5148.3  | 20    |
| H16  | 2170.44  | 5956.36  | 6022.97 | 23    |
| H17  | 1369.77  | 4123.37  | 6551.32 | 23    |
| H18  | 3248.99  | 2599     | 6617.78 | 21    |
| H20A | 3063.98  | 7357.36  | 5188.11 | 35    |
| H20B | 4664.51  | 8196.22  | 5252.14 | 35    |
| H20C | 3835.39  | 7676.18  | 6090.5  | 35    |
| H1A  | 10121.4  | 1736.66  | 5722.82 | 20    |

## 5. Copies of NMR spectra

### $^1\text{H}$ NMR spectrum of **3aa** (400 MHz, $\text{CDCl}_3$ )

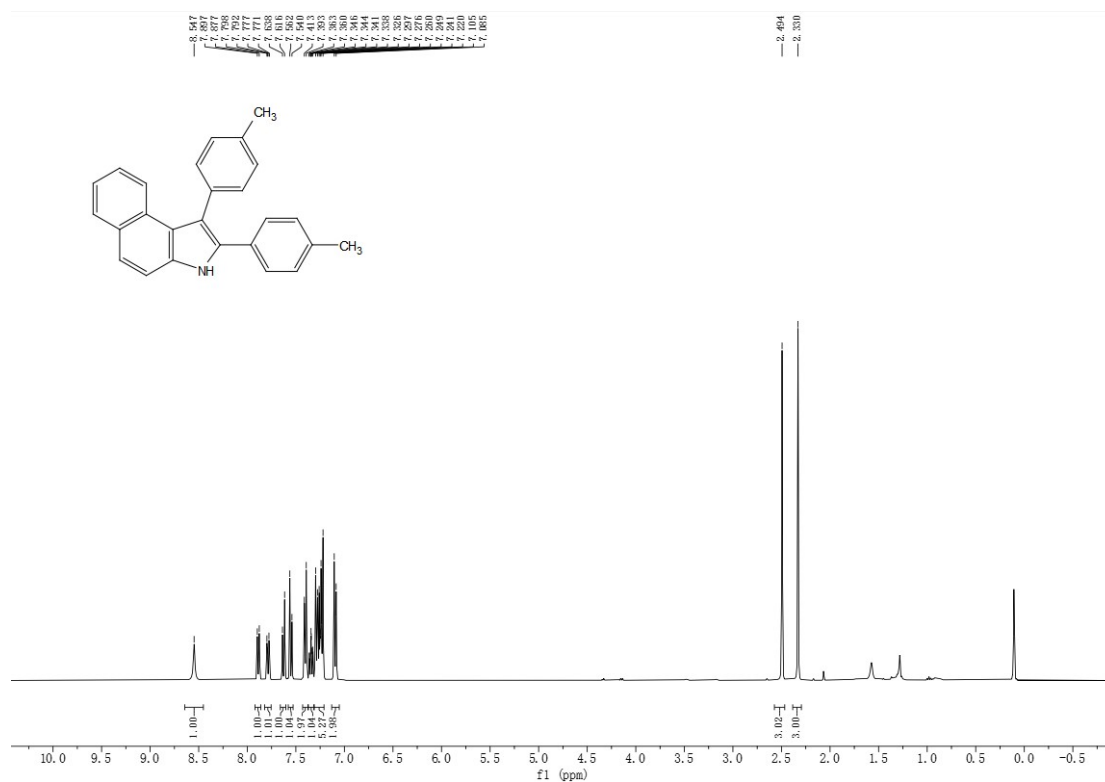

### $^{13}\text{C}$ NMR spectrum of **3aa** (101 MHz, $\text{CDCl}_3$ )

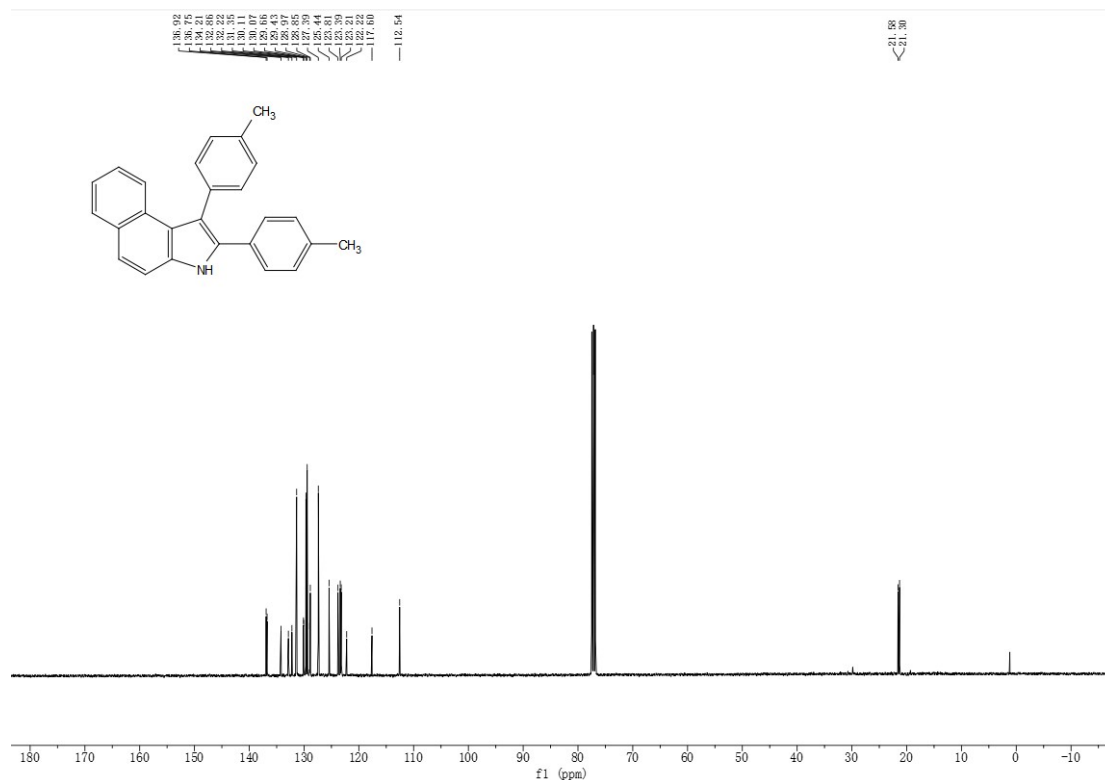



<sup>1</sup>H NMR spectrum of **3ac** (400 MHz, CDCl<sub>3</sub>)

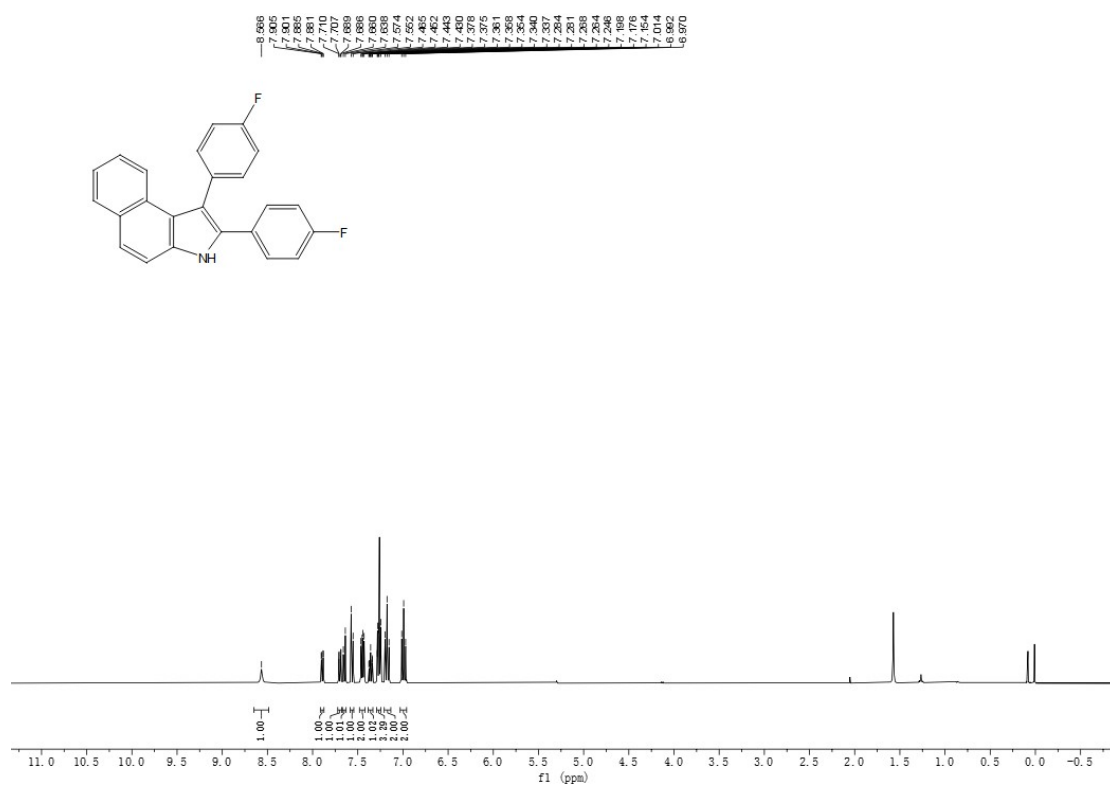

<sup>13</sup>C NMR spectrum of **3ac** (101 MHz, CDCl<sub>3</sub>)

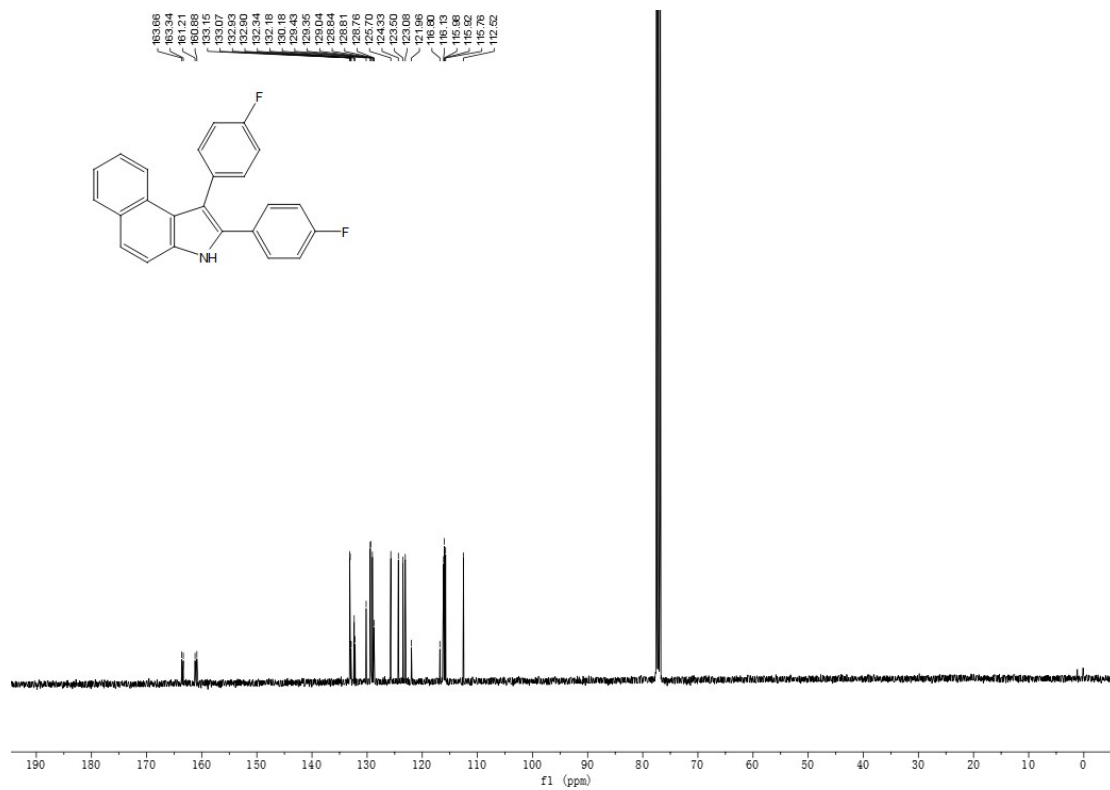



**<sup>1</sup>H NMR spectrum of 3ae (400 MHz, CDCl<sub>3</sub>)**

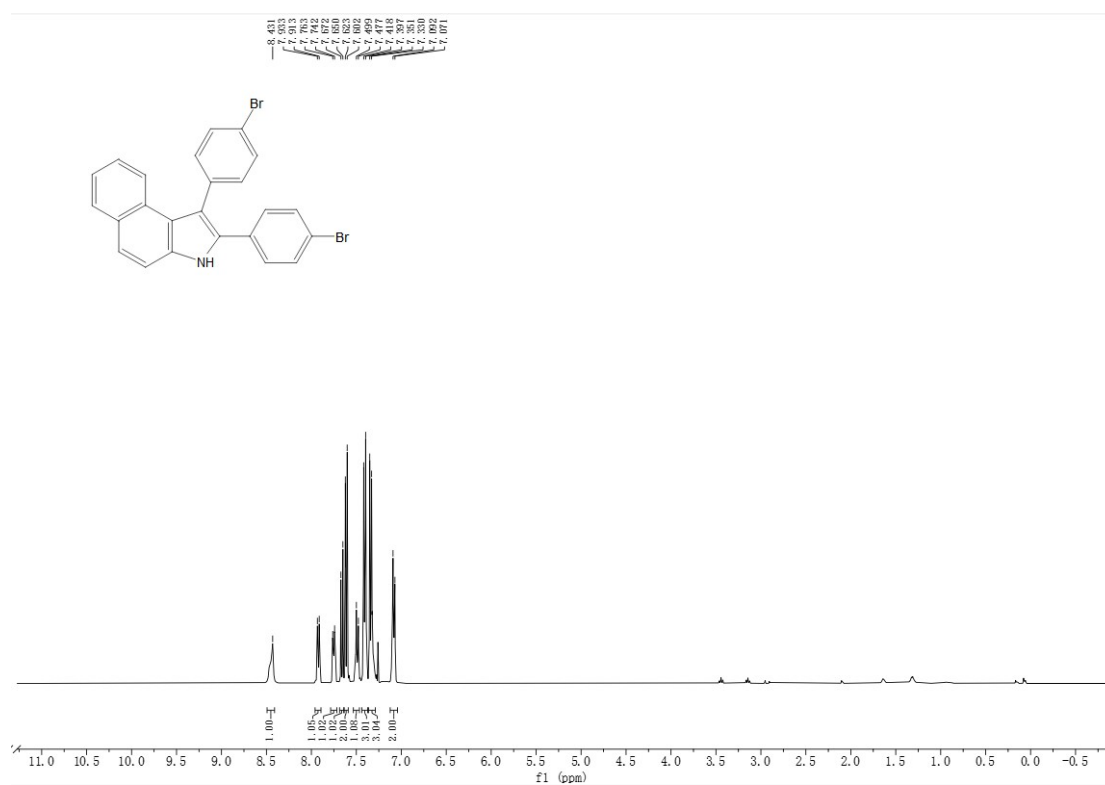

**<sup>13</sup>C NMR spectrum of 3ae (101 MHz, CDCl<sub>3</sub>)**

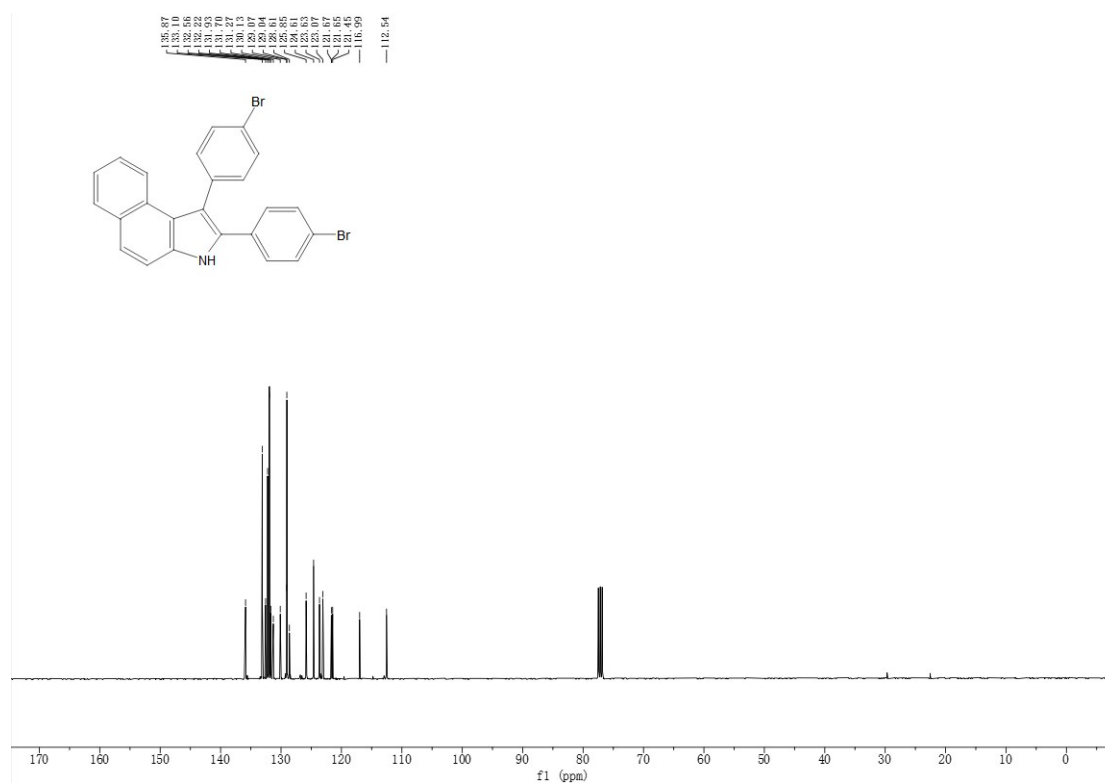

<sup>1</sup>H NMR spectrum of **3af** (400 MHz, CDCl<sub>3</sub>)

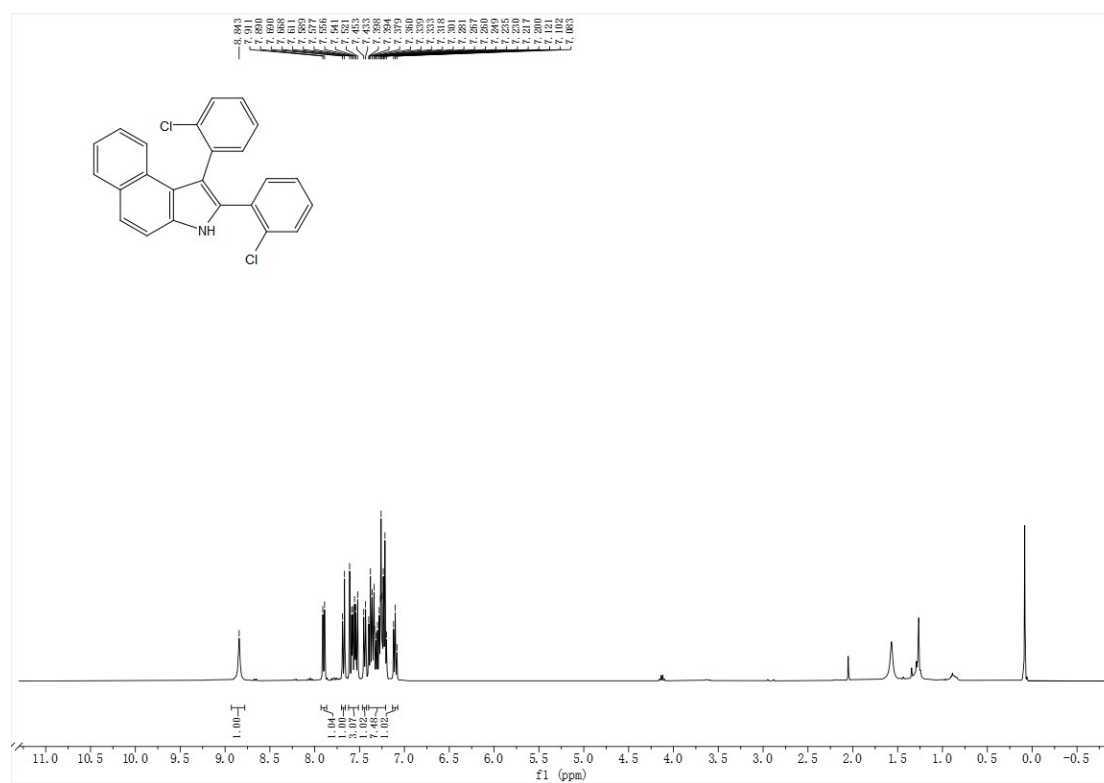

<sup>13</sup>C NMR spectrum of **3af** (101 MHz, CDCl<sub>3</sub>)

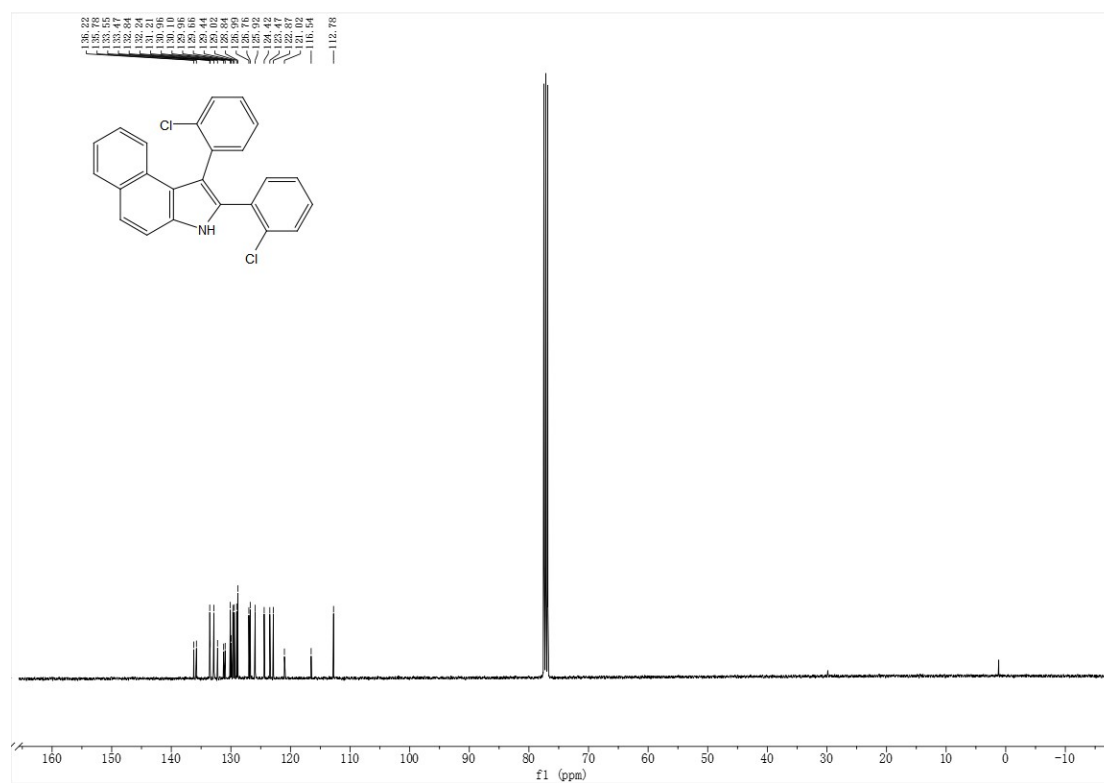

**<sup>1</sup>H NMR spectrum of 3ag (400 MHz, CDCl<sub>3</sub>)**

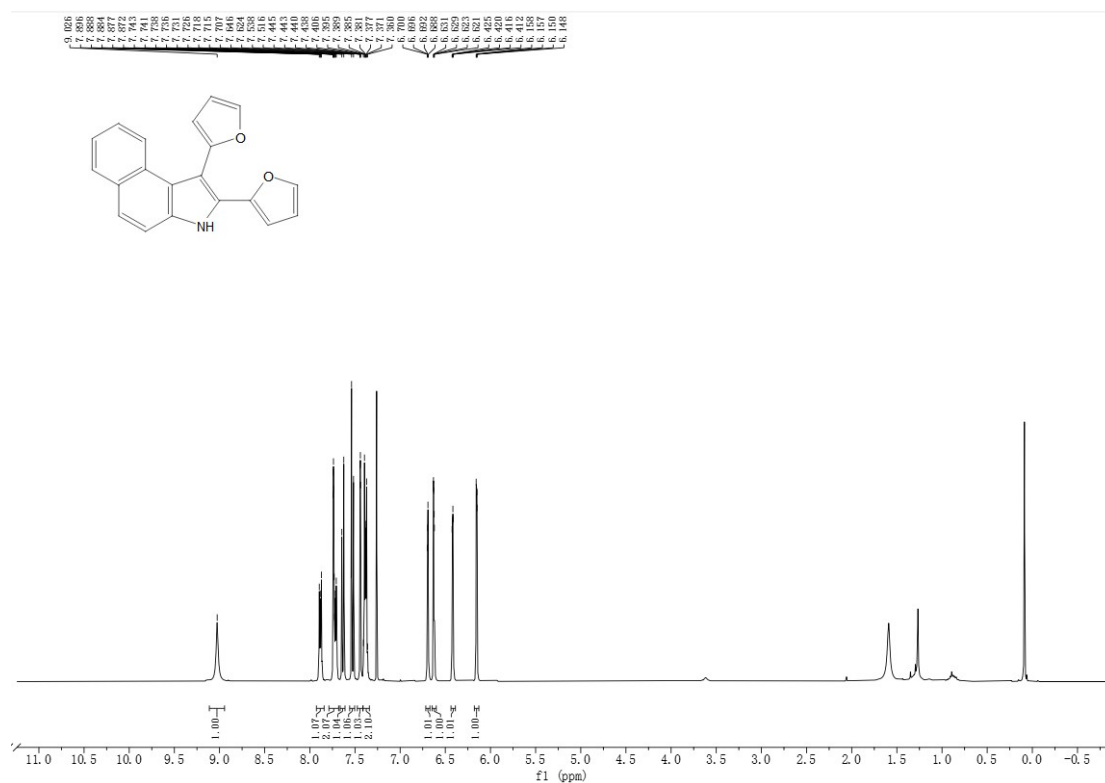

<sup>1</sup>H NMR spectrum of **3ah** (400 MHz, CDCl<sub>3</sub>)

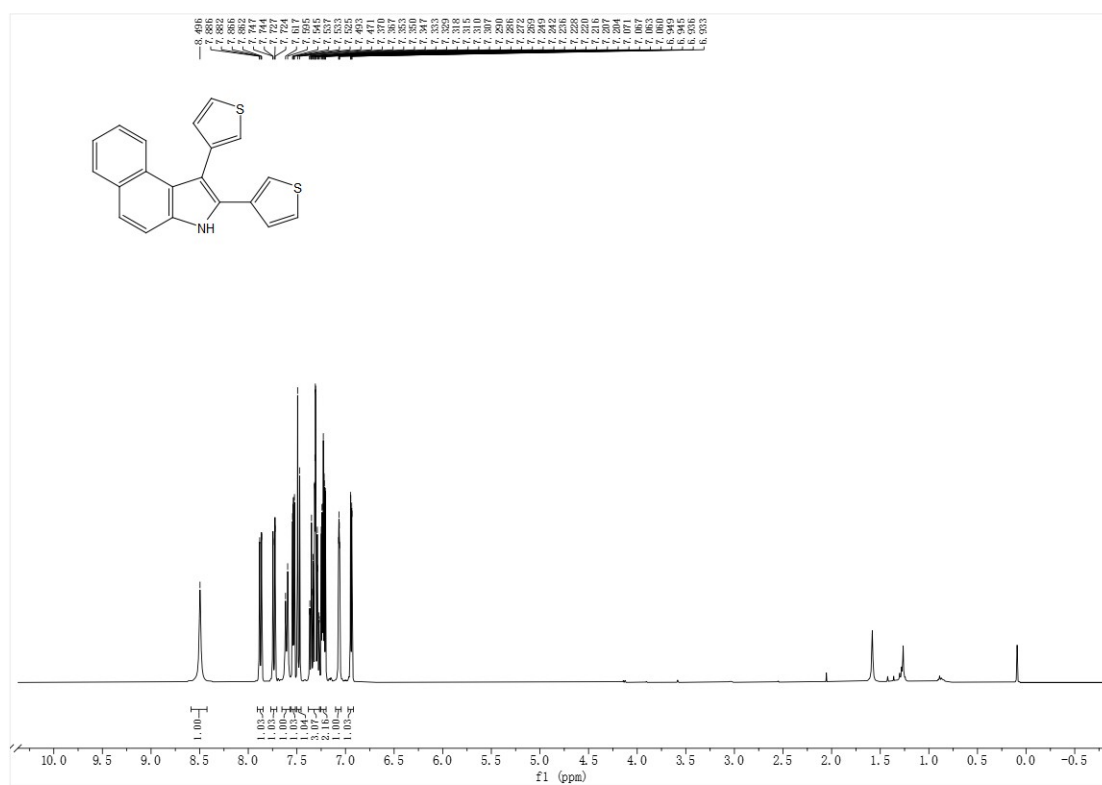

<sup>13</sup>C NMR spectrum of **3ah** (101 MHz, CDCl<sub>3</sub>)

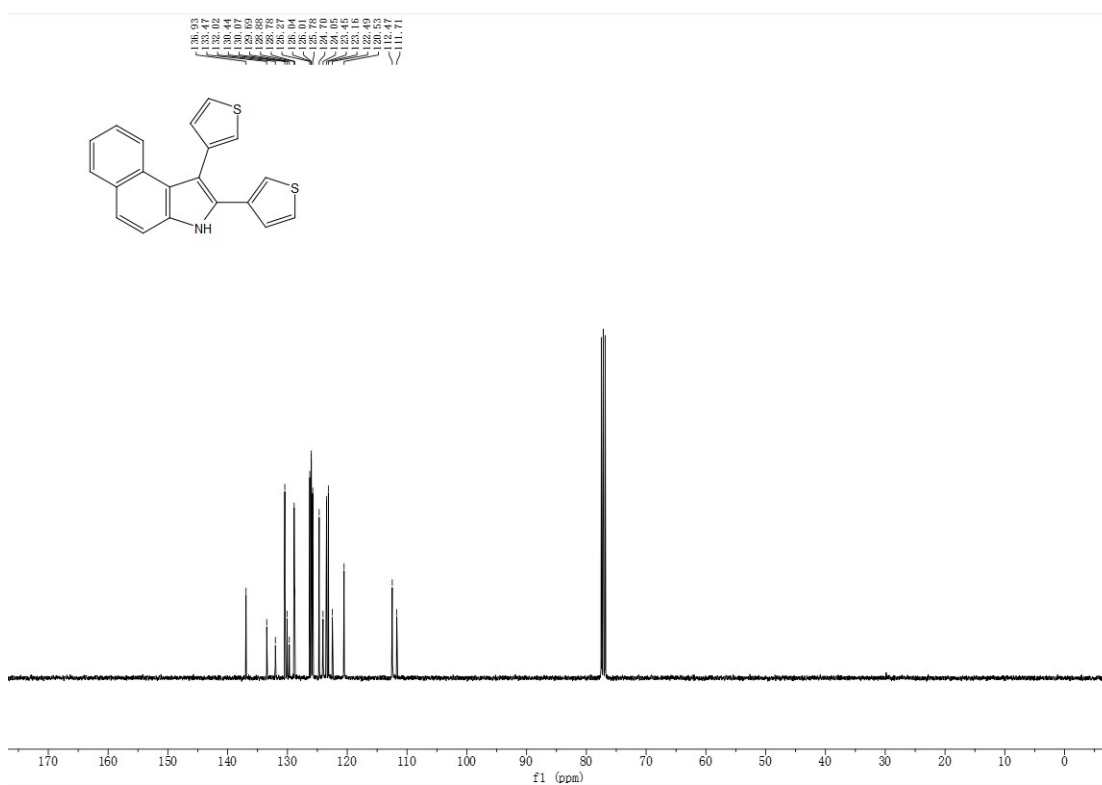



**<sup>1</sup>H NMR spectrum of 3aj (400 MHz, CDCl<sub>3</sub>)**

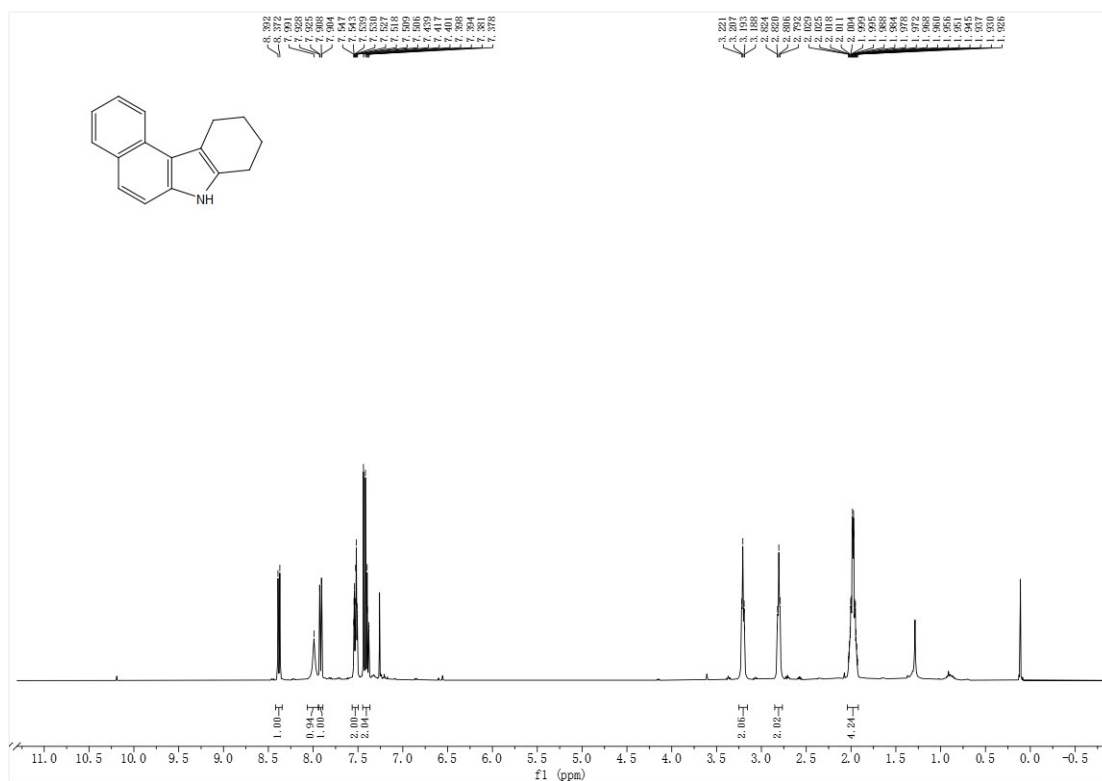

**<sup>13</sup>C NMR spectrum of 3aj (101 MHz, CDCl<sub>3</sub>)**

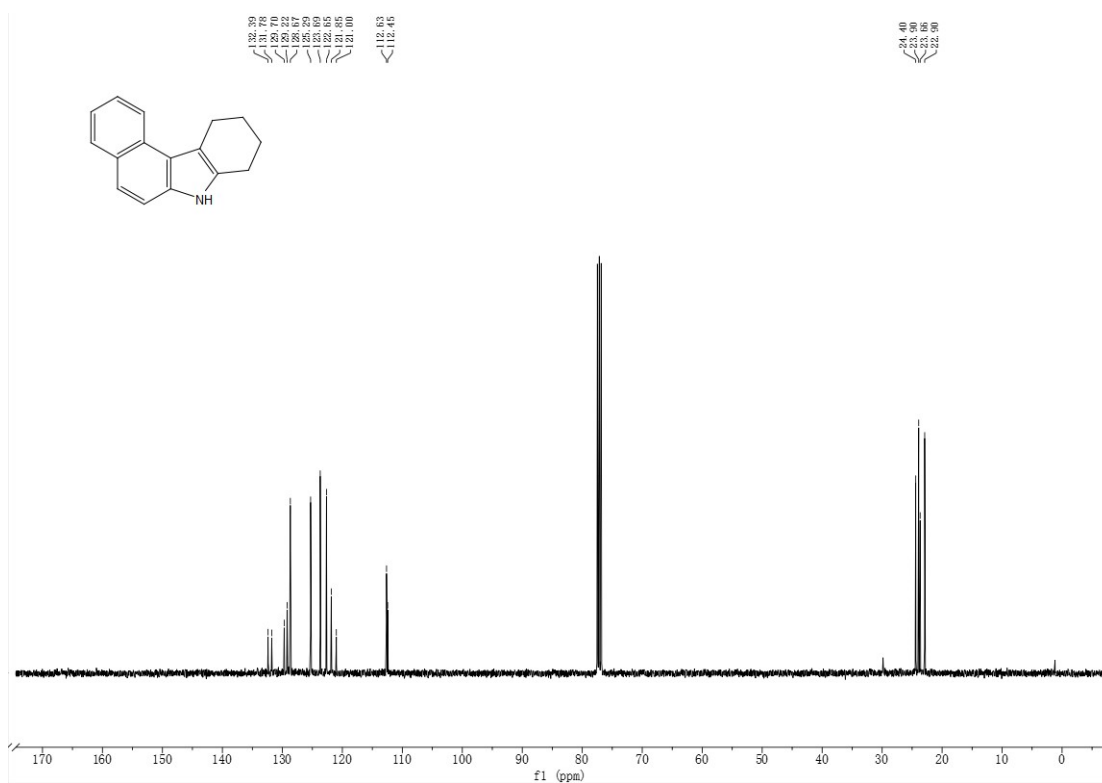

<sup>1</sup>H NMR spectrum of **3ak** (400 MHz, CDCl<sub>3</sub>)

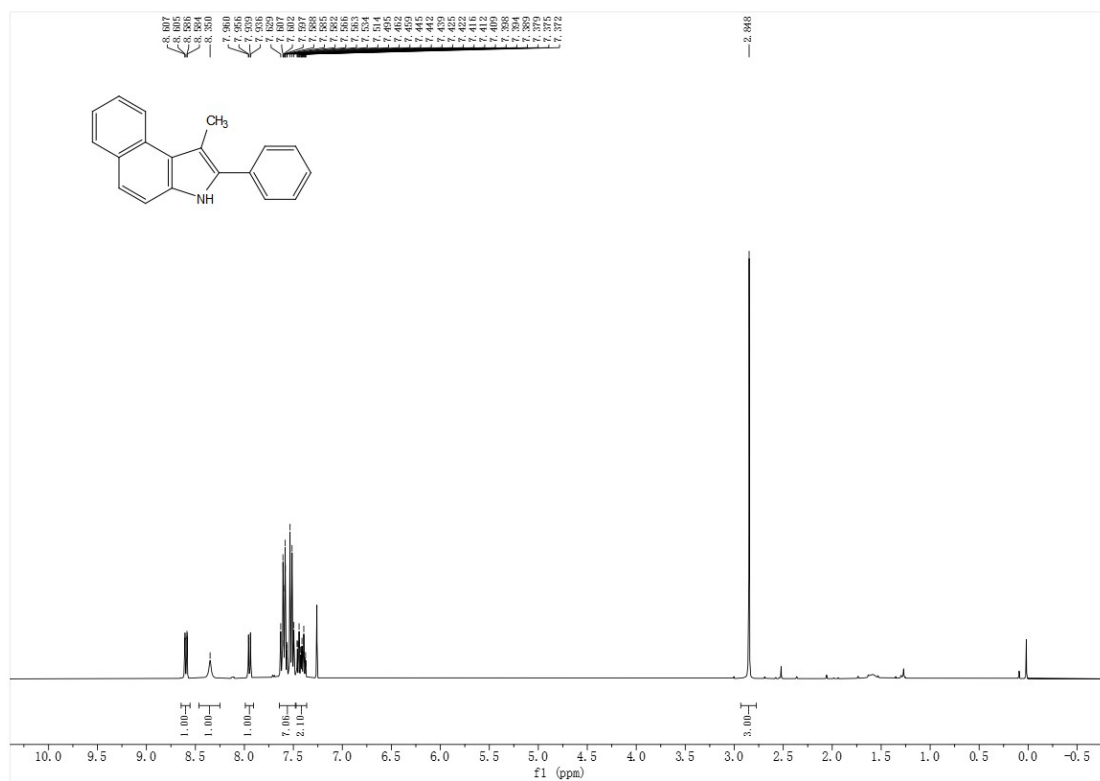

<sup>13</sup>C NMR spectrum of **3ak** (101 MHz, CDCl<sub>3</sub>)

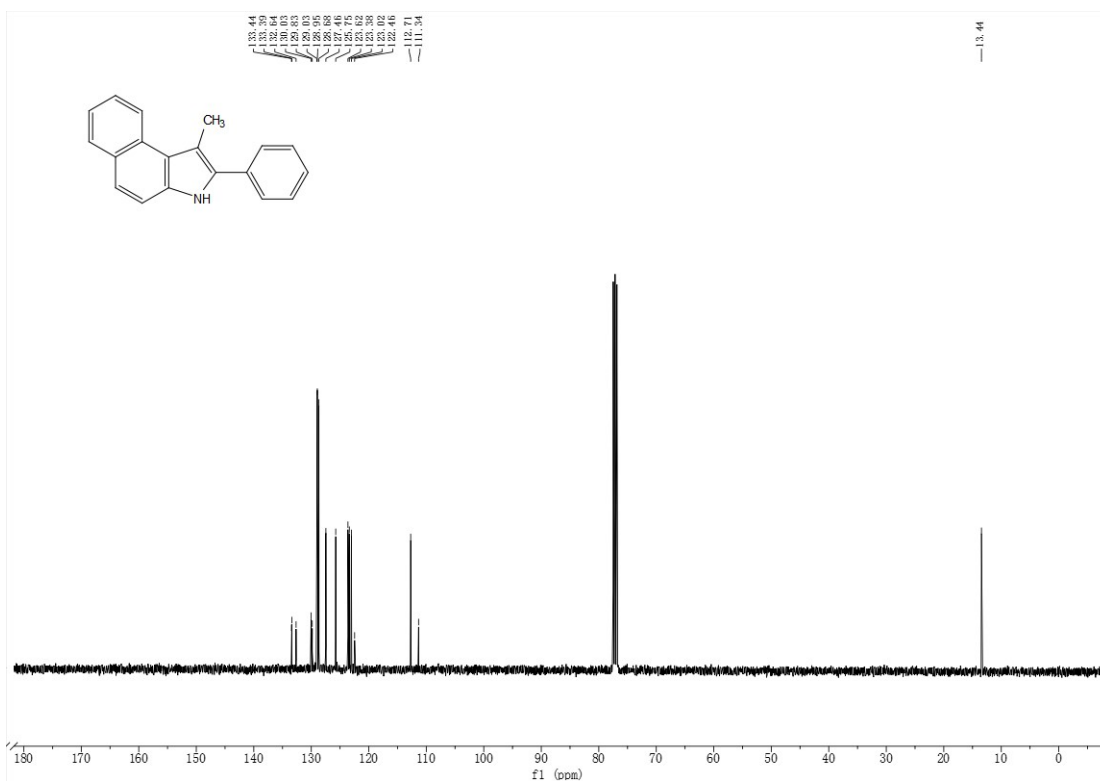



**<sup>1</sup>H NMR spectrum of 3ba (400 MHz, CDCl<sub>3</sub>)**

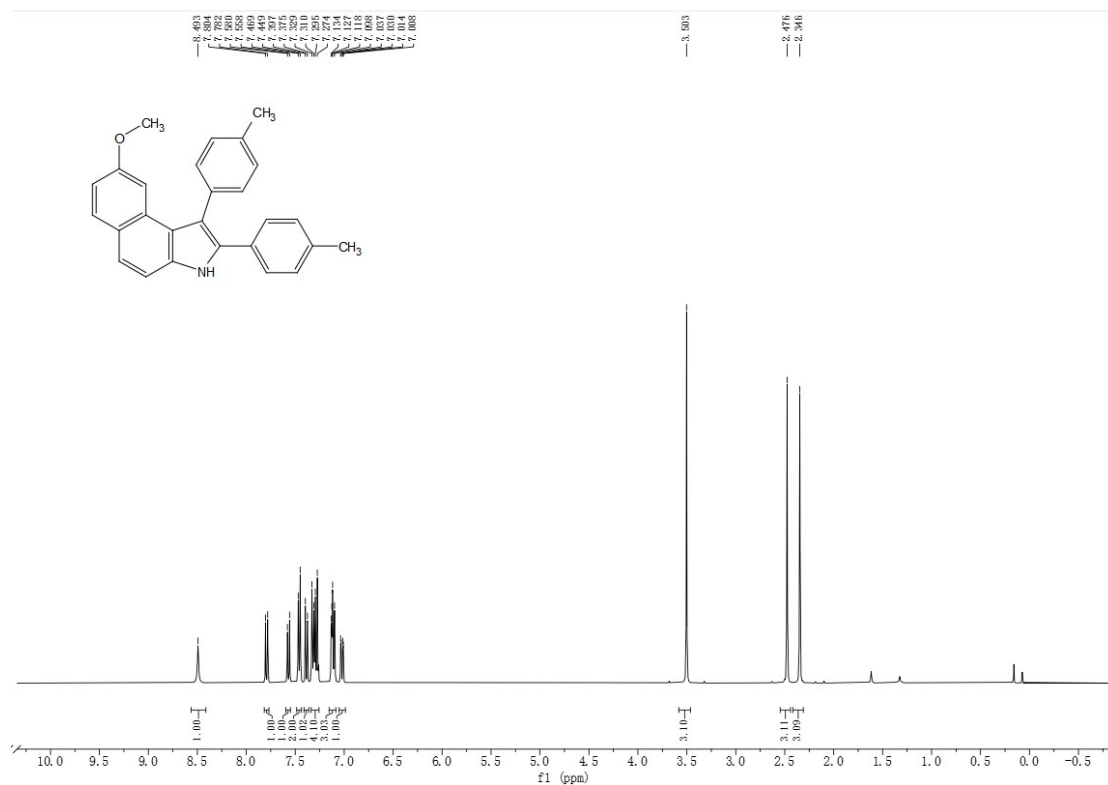

**<sup>13</sup>C NMR spectrum of 3ba (101 MHz, CDCl<sub>3</sub>)**

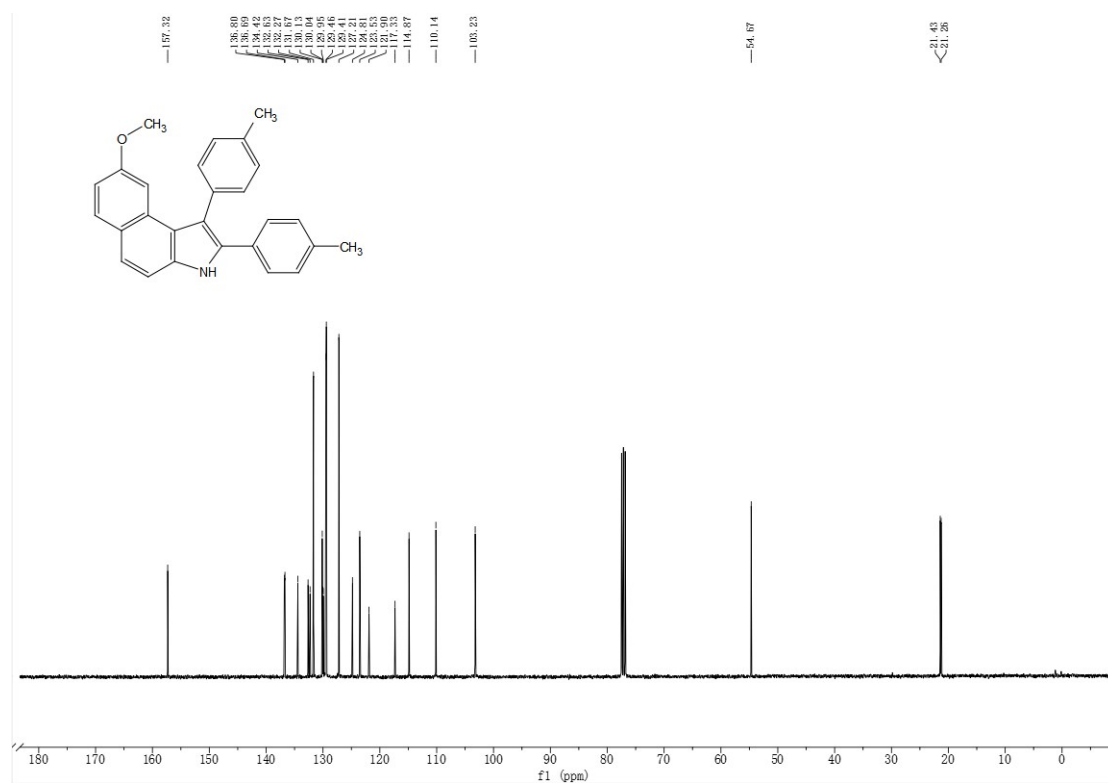

**<sup>1</sup>H NMR spectrum of 3bb (400 MHz, CDCl<sub>3</sub>)**

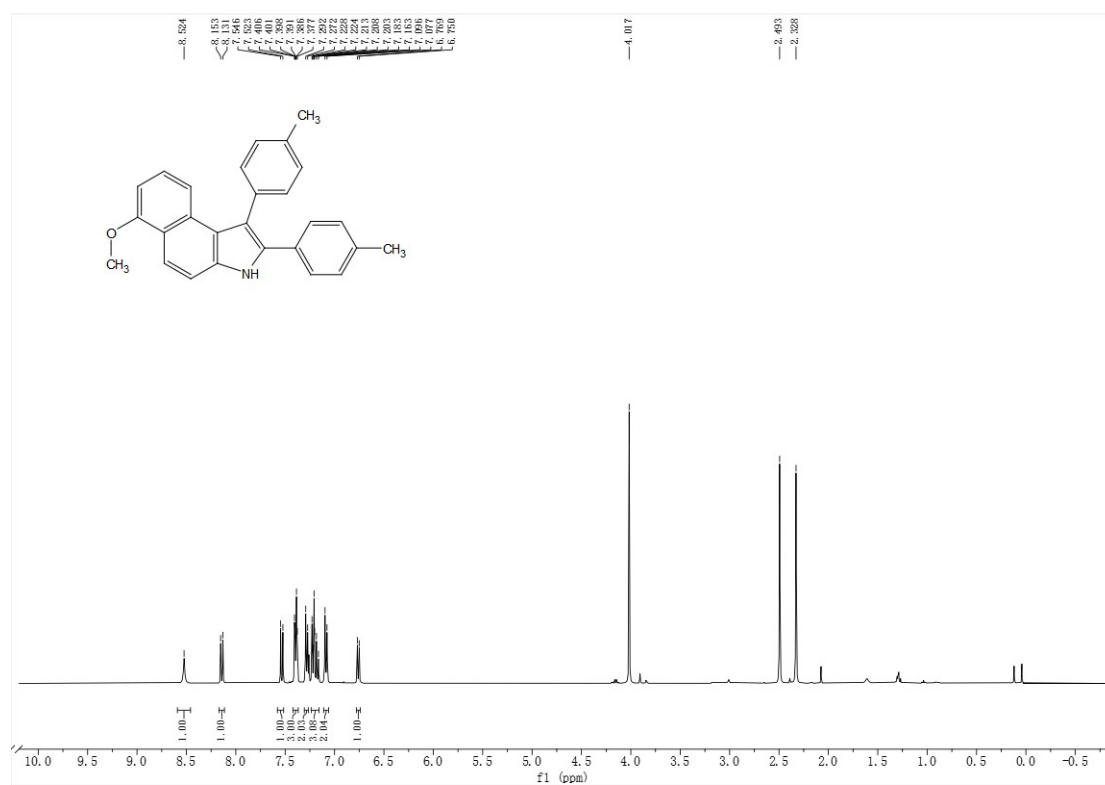

**<sup>13</sup>C NMR spectrum of 3bb (101 MHz, CDCl<sub>3</sub>)**

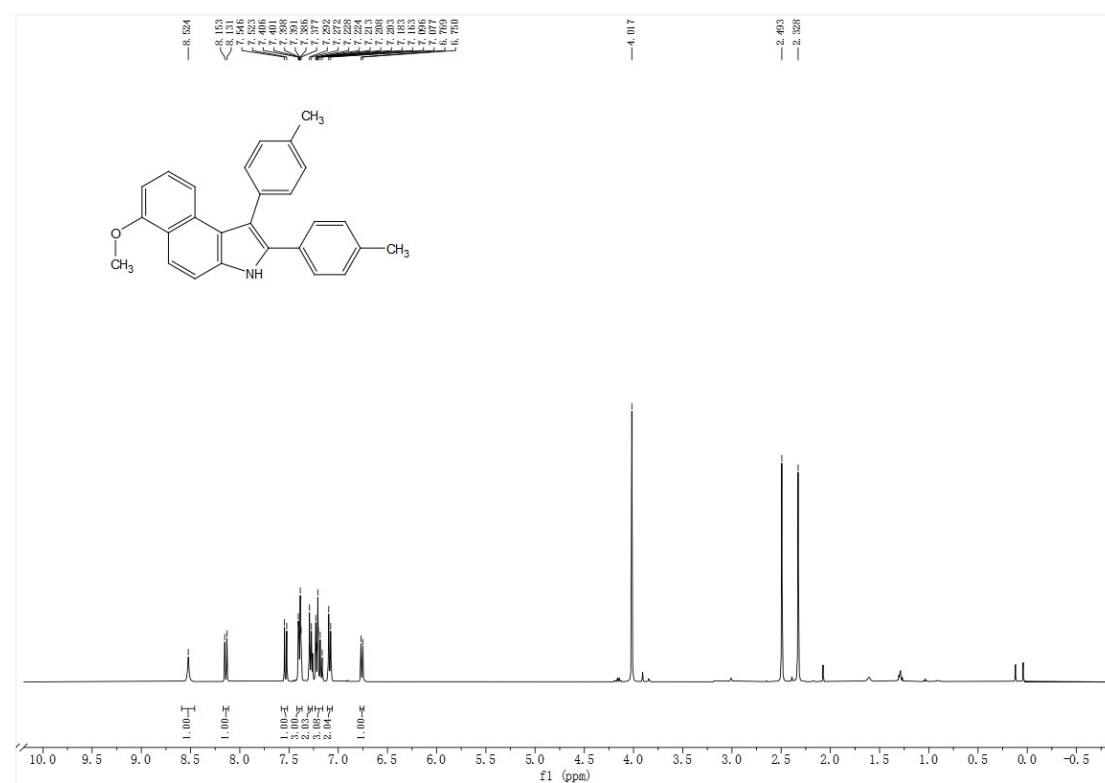

$^1\text{H}$  NMR spectrum of **3bc** (400 MHz,  $\text{CDCl}_3$ )

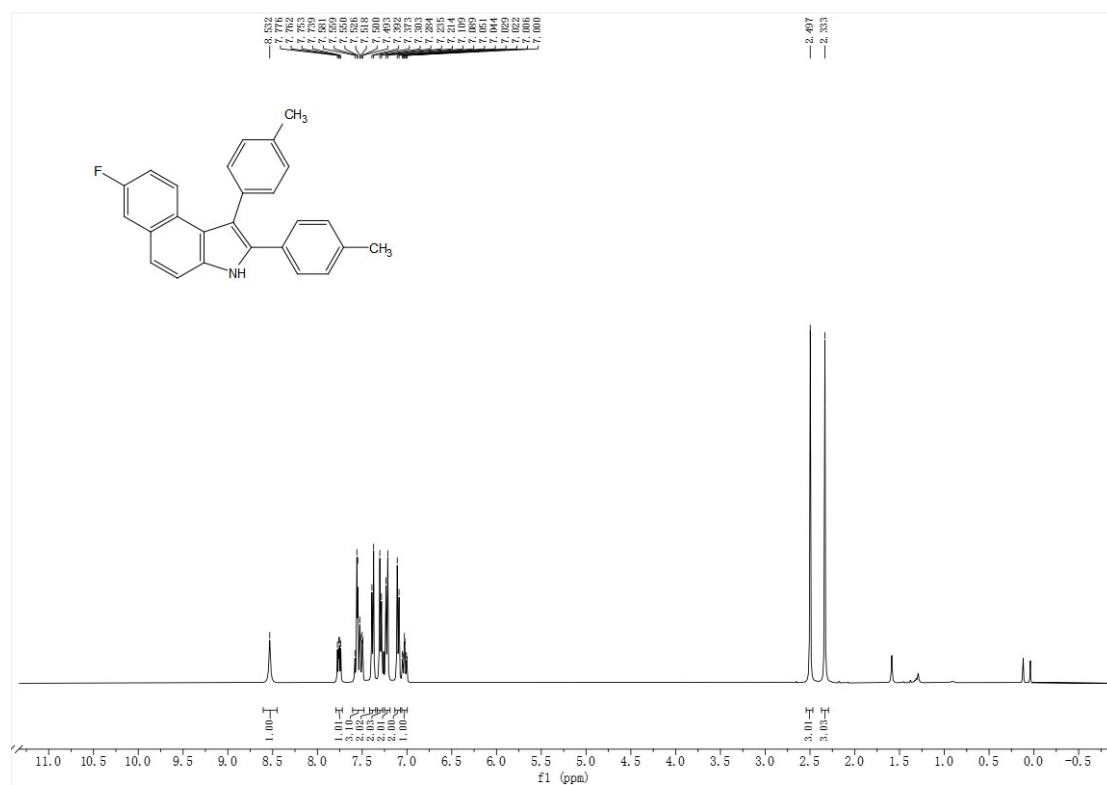

$^{13}\text{C}$  NMR spectrum of **3bc** (101 MHz,  $\text{CDCl}_3$ )

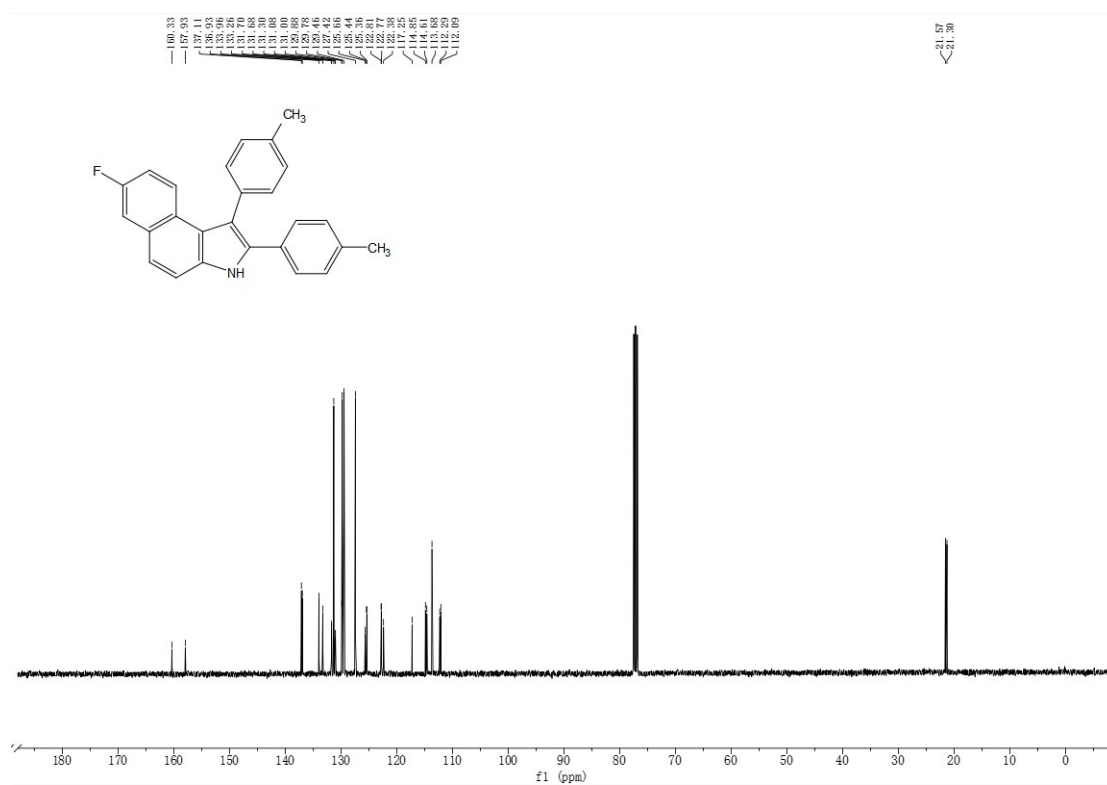

**<sup>1</sup>H NMR spectrum of 3bd (400 MHz, CDCl<sub>3</sub>)**

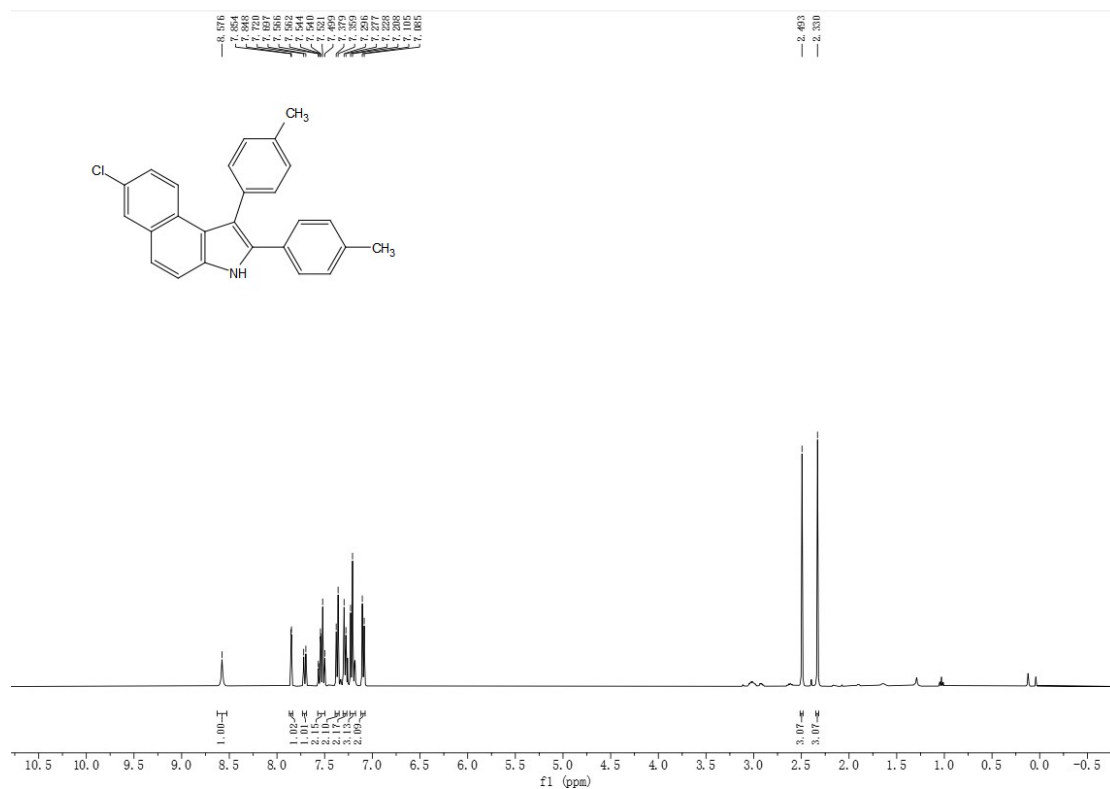

**<sup>13</sup>C NMR spectrum of 3bd (101 MHz, CDCl<sub>3</sub>)**

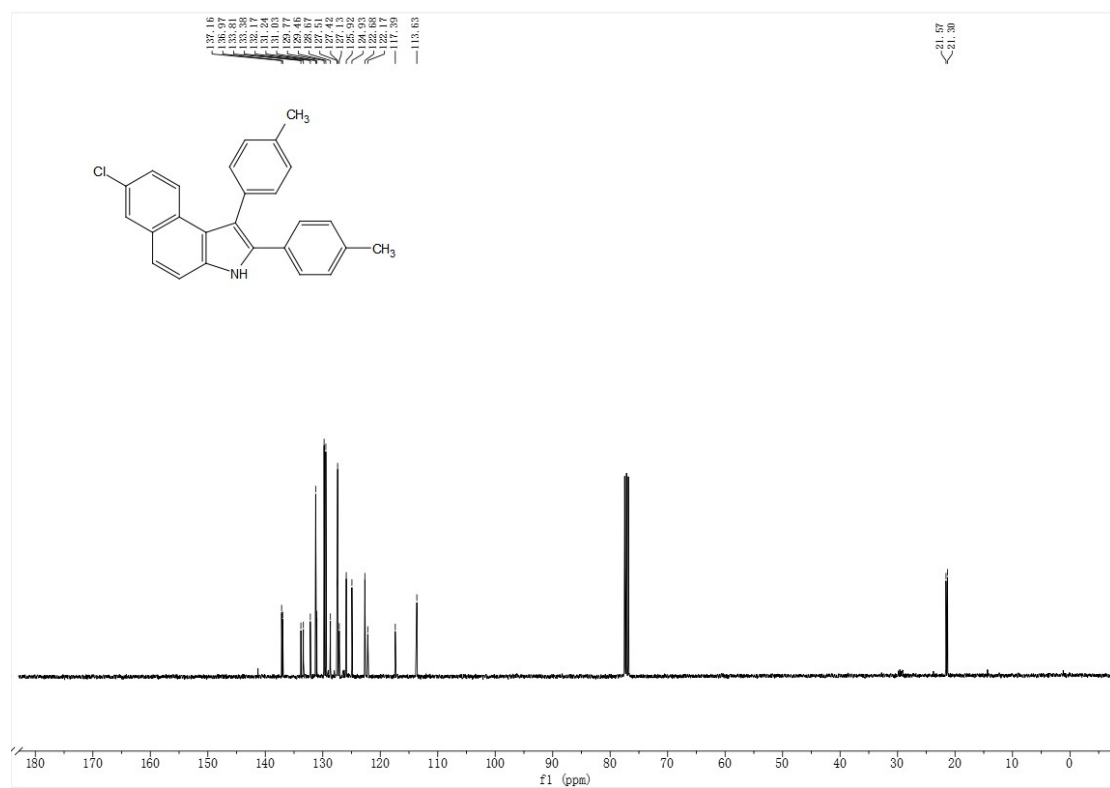

**<sup>1</sup>H NMR spectrum of 3be (400 MHz, CDCl<sub>3</sub>)**

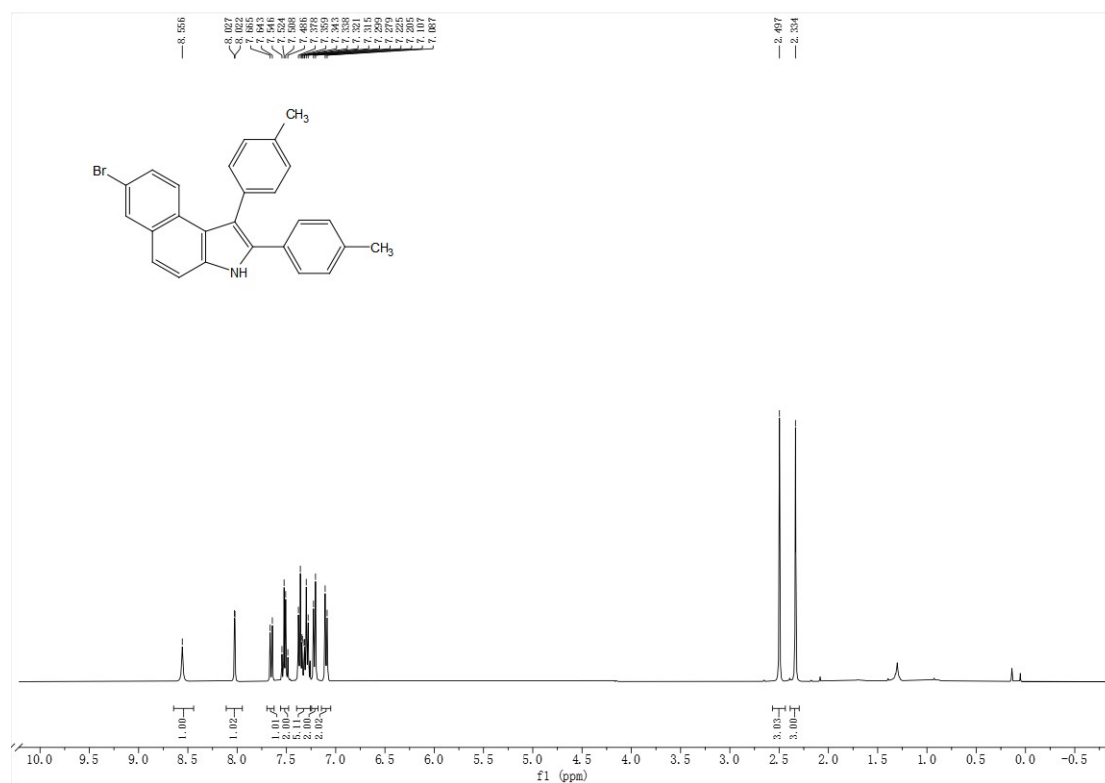

**<sup>13</sup>C NMR spectrum of 3be (101 MHz, CDCl<sub>3</sub>)**

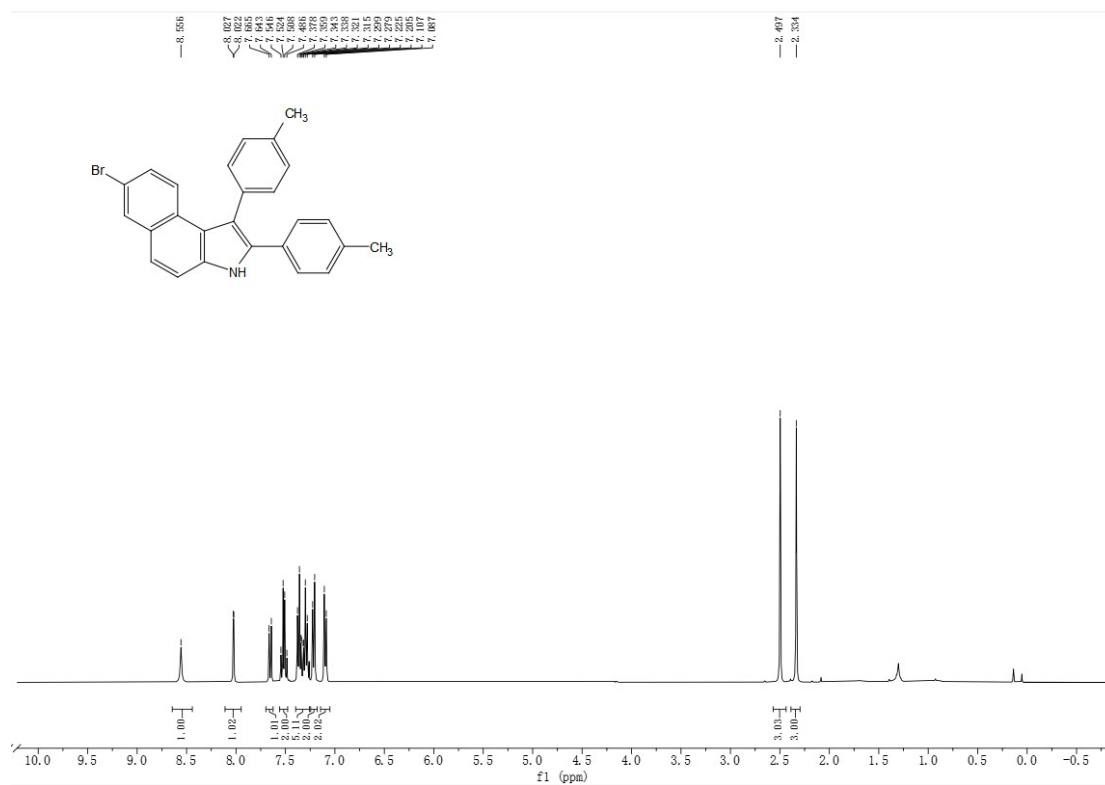

$^1\text{H}$  NMR spectrum of **3bf** (400 MHz,  $\text{CDCl}_3$ )

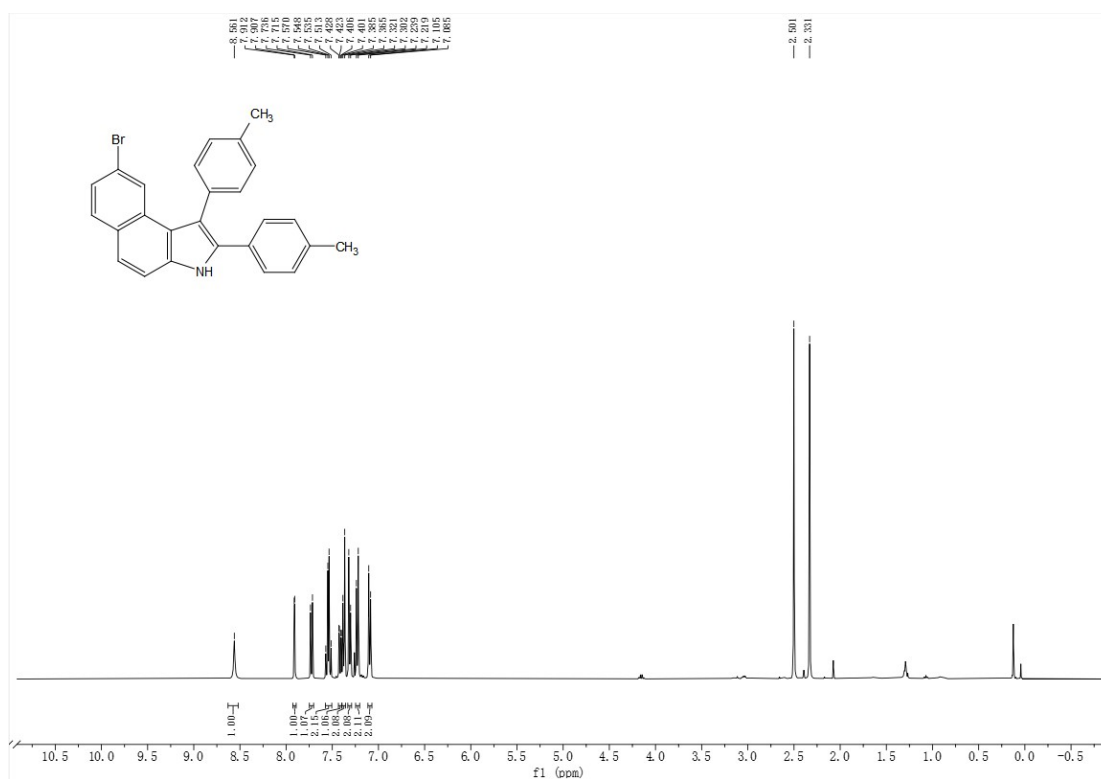

$^{13}\text{C}$  NMR spectrum of **3bf** (101 MHz,  $\text{CDCl}_3$ )

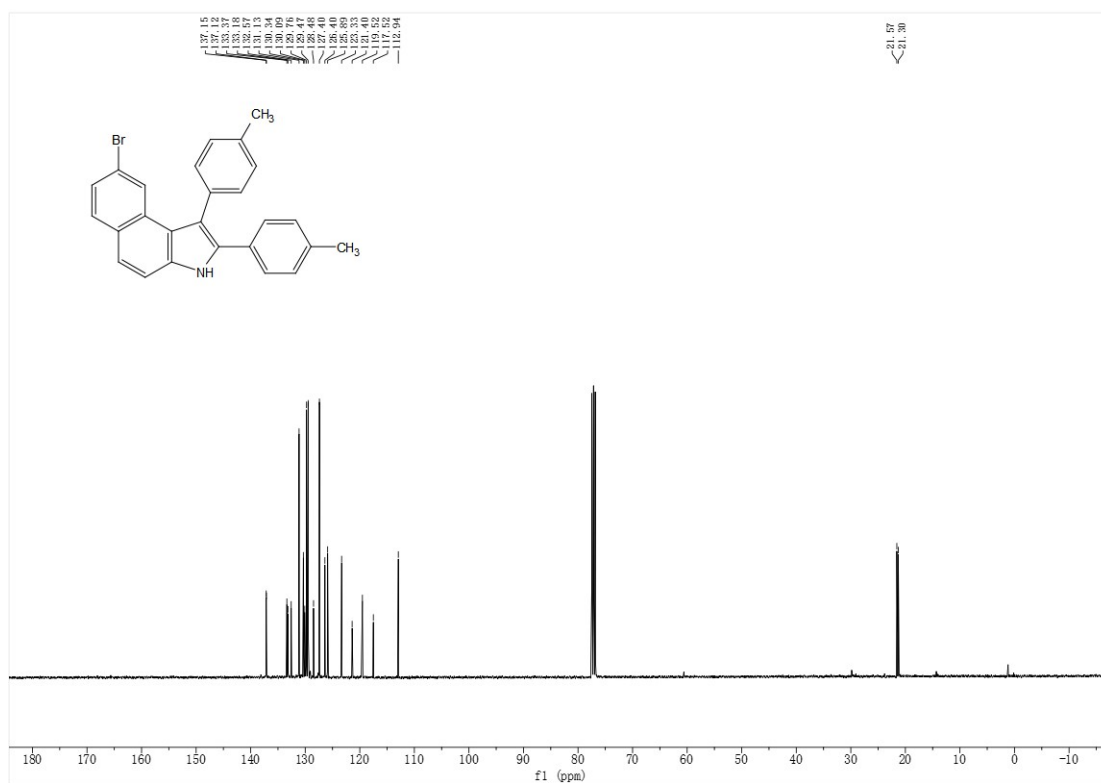

<sup>1</sup>H NMR spectrum of **3bg** (400 MHz, CDCl<sub>3</sub>)

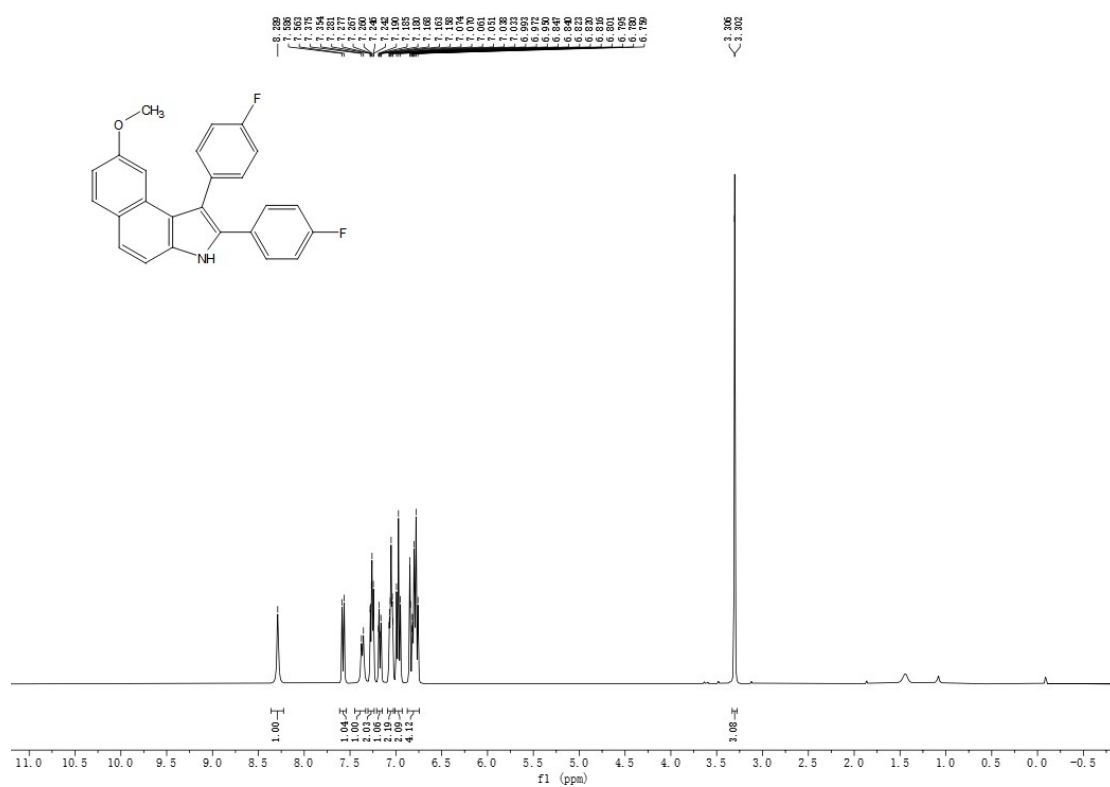

<sup>13</sup>C NMR spectrum of **3bg** (101 MHz, CDCl<sub>3</sub>)

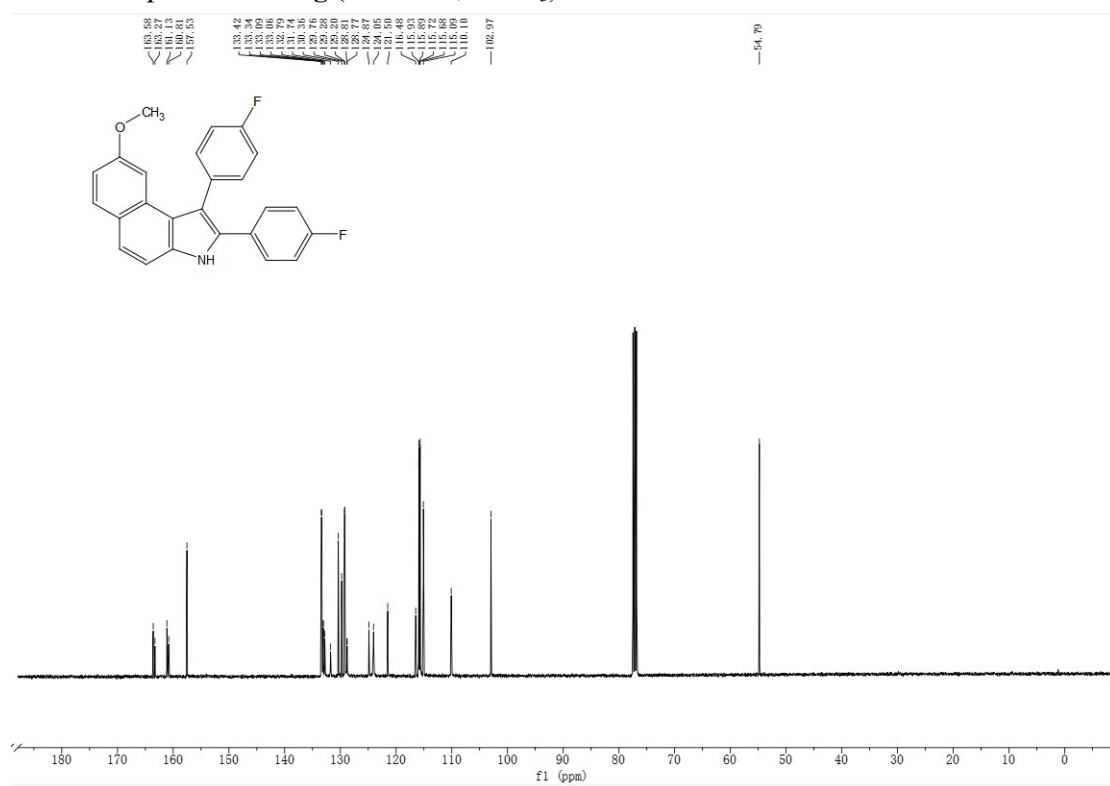

**<sup>1</sup>H NMR spectrum of 3bh (400 MHz, DMSO-*d*<sub>6</sub>)**

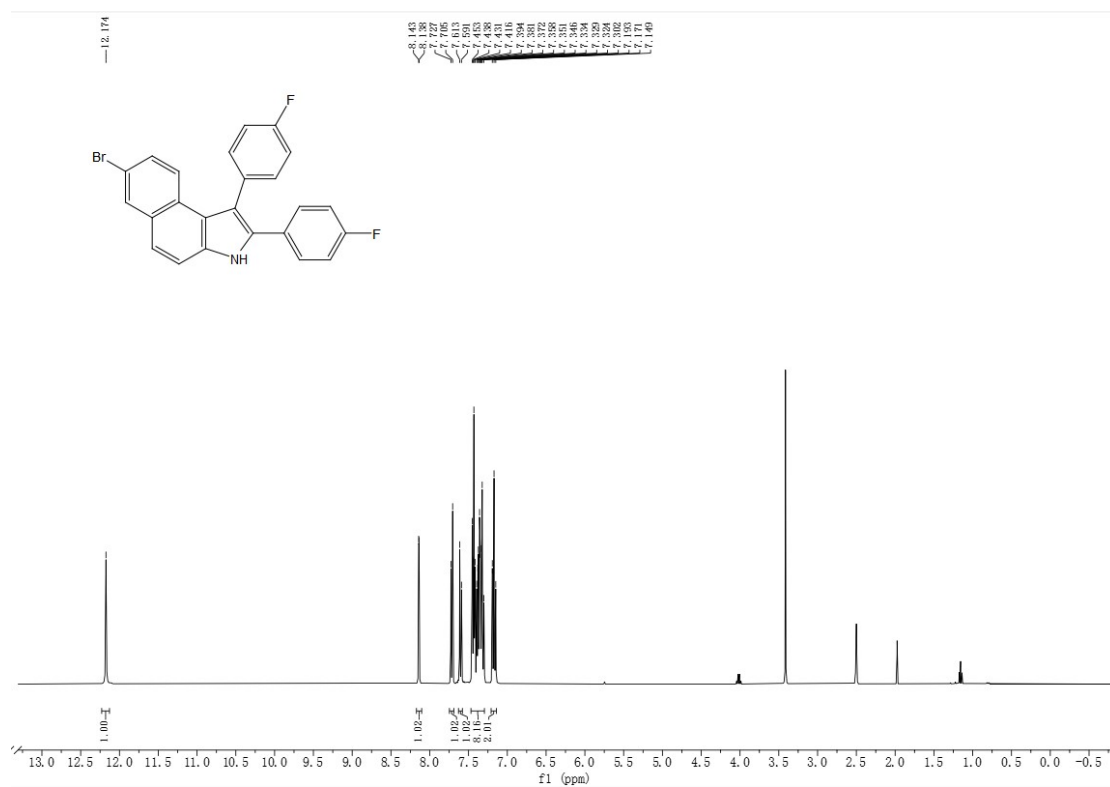

**<sup>13</sup>C NMR spectrum of 3bh (101 MHz, DMSO-*d*<sub>6</sub>)**

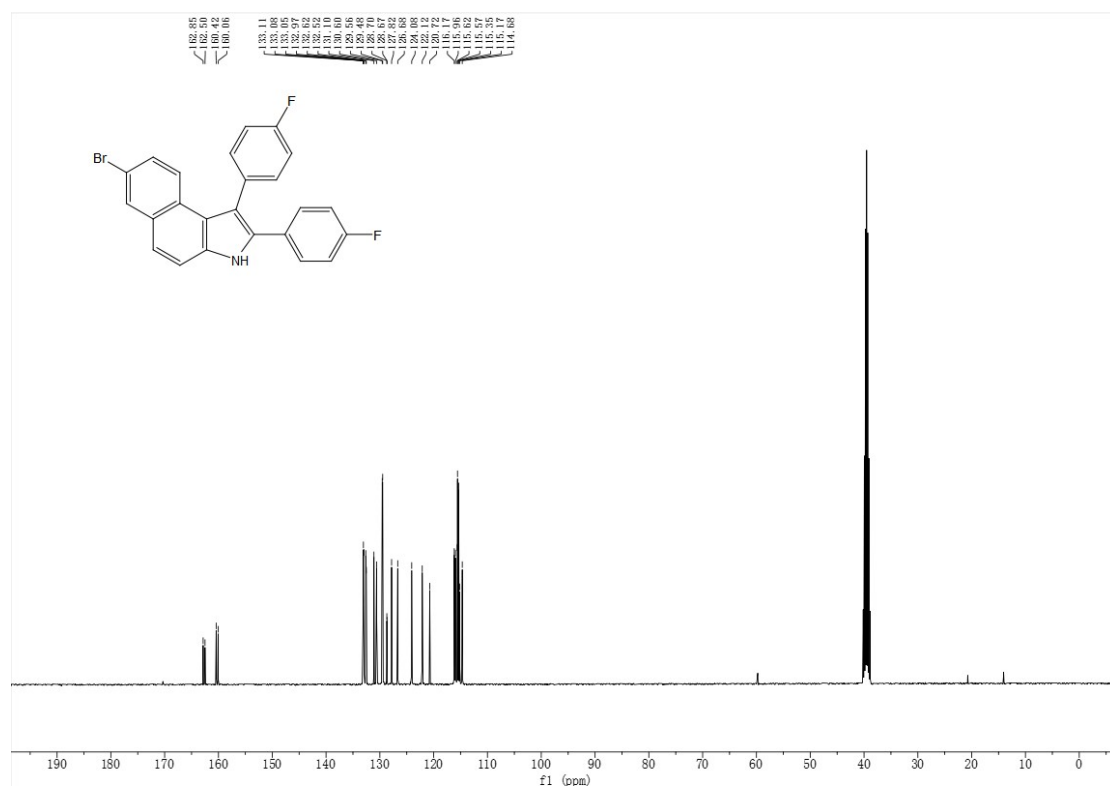

**<sup>1</sup>H NMR spectrum of 3bi (400 MHz, CDCl<sub>3</sub>)**

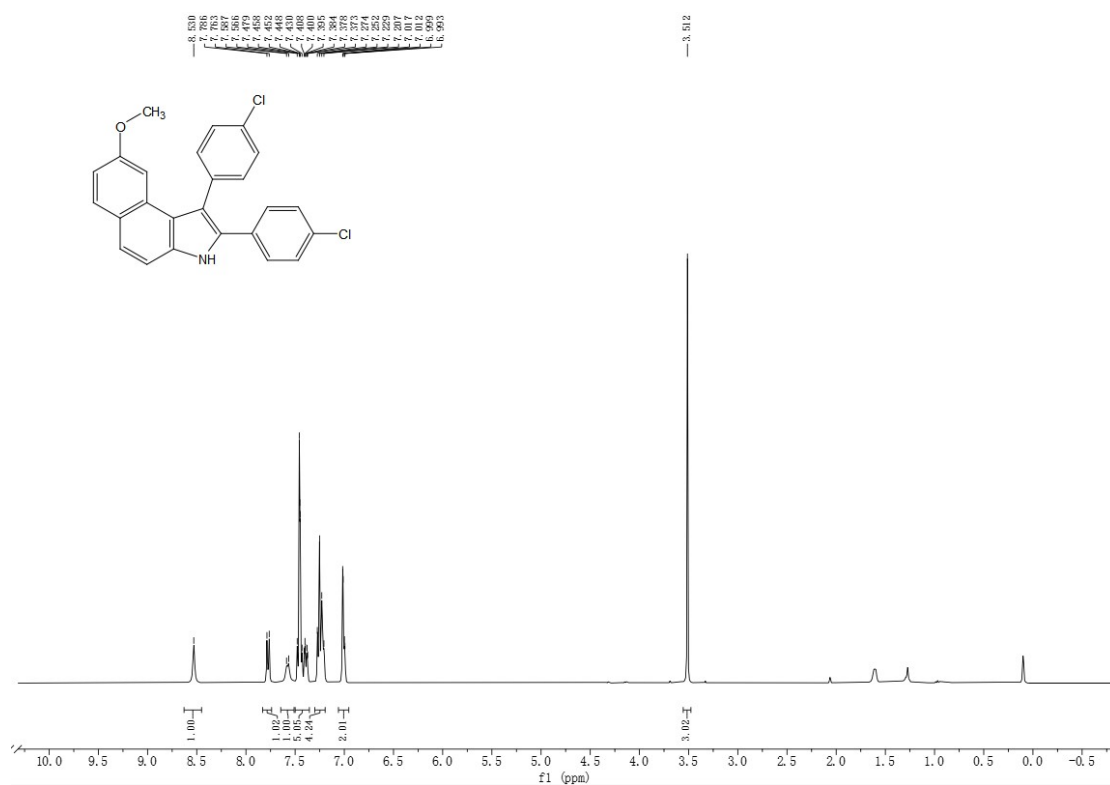

**<sup>13</sup>C NMR spectrum of 3bi (101 MHz, CDCl<sub>3</sub>)**

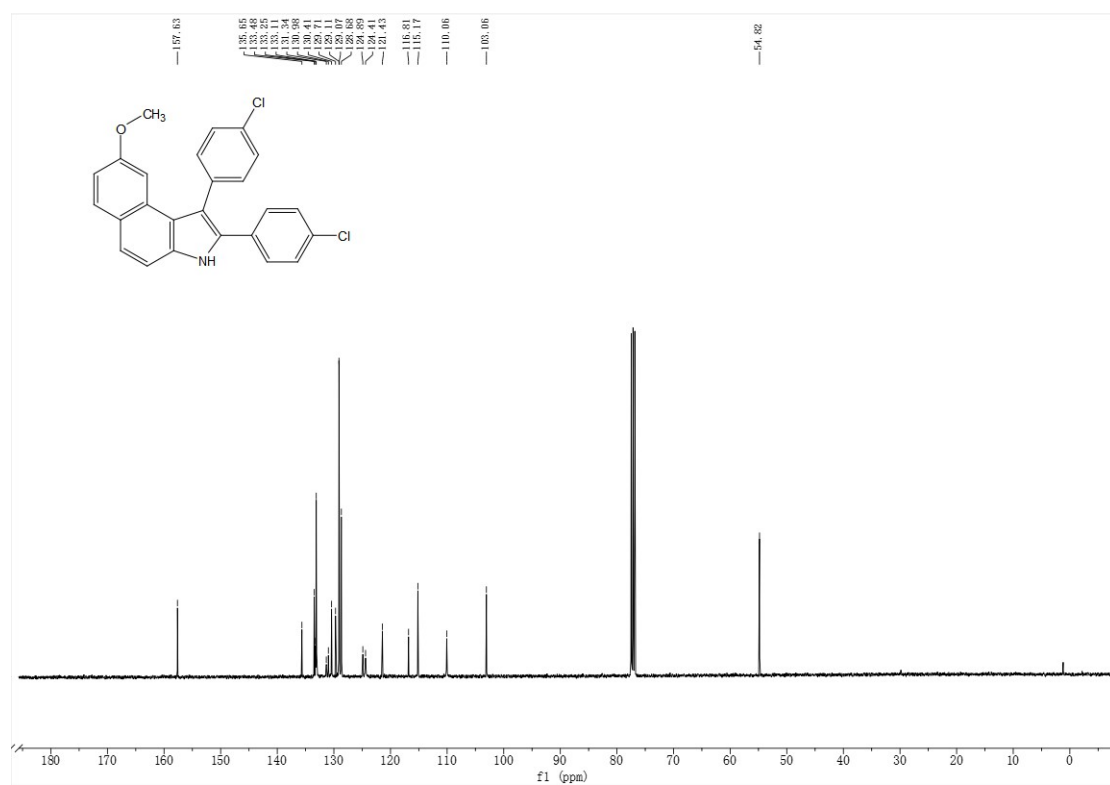

**<sup>1</sup>H NMR spectrum of 3bj (400 MHz, CDCl<sub>3</sub>)**

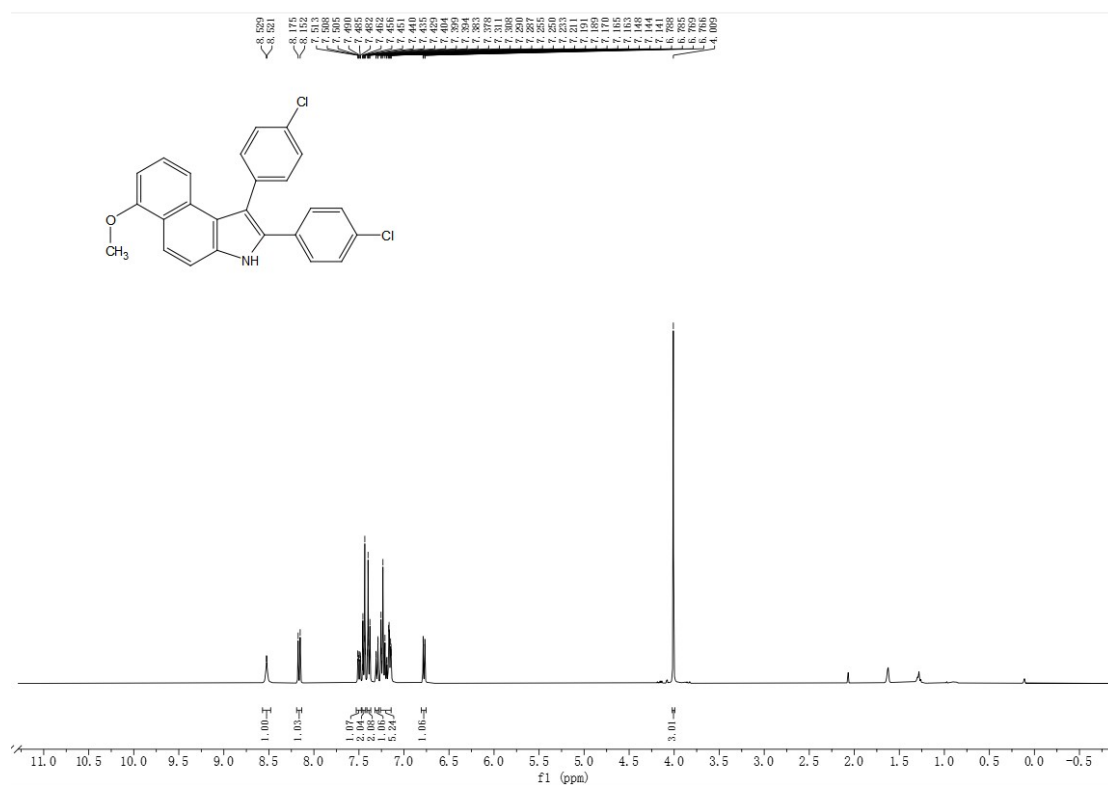

**<sup>13</sup>C NMR spectrum of 3bj (101 MHz, CDCl<sub>3</sub>)**

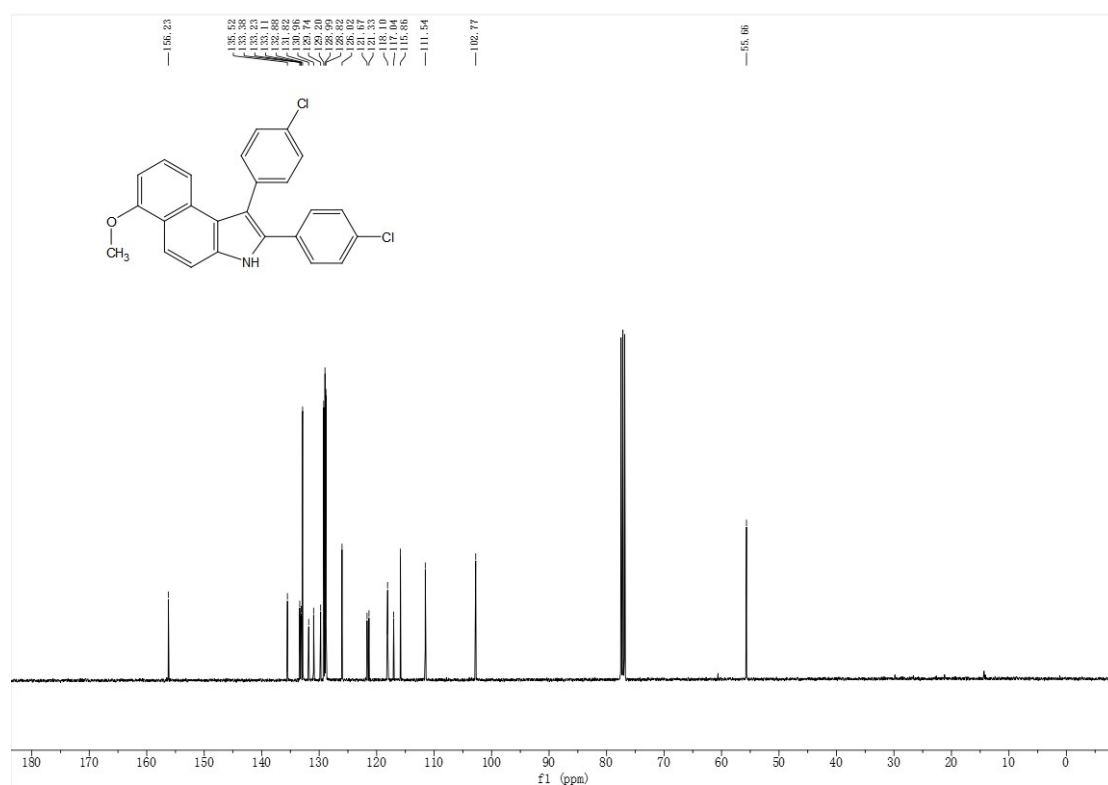



**<sup>1</sup>H NMR spectrum of 3bl (400 MHz, CDCl<sub>3</sub>)**

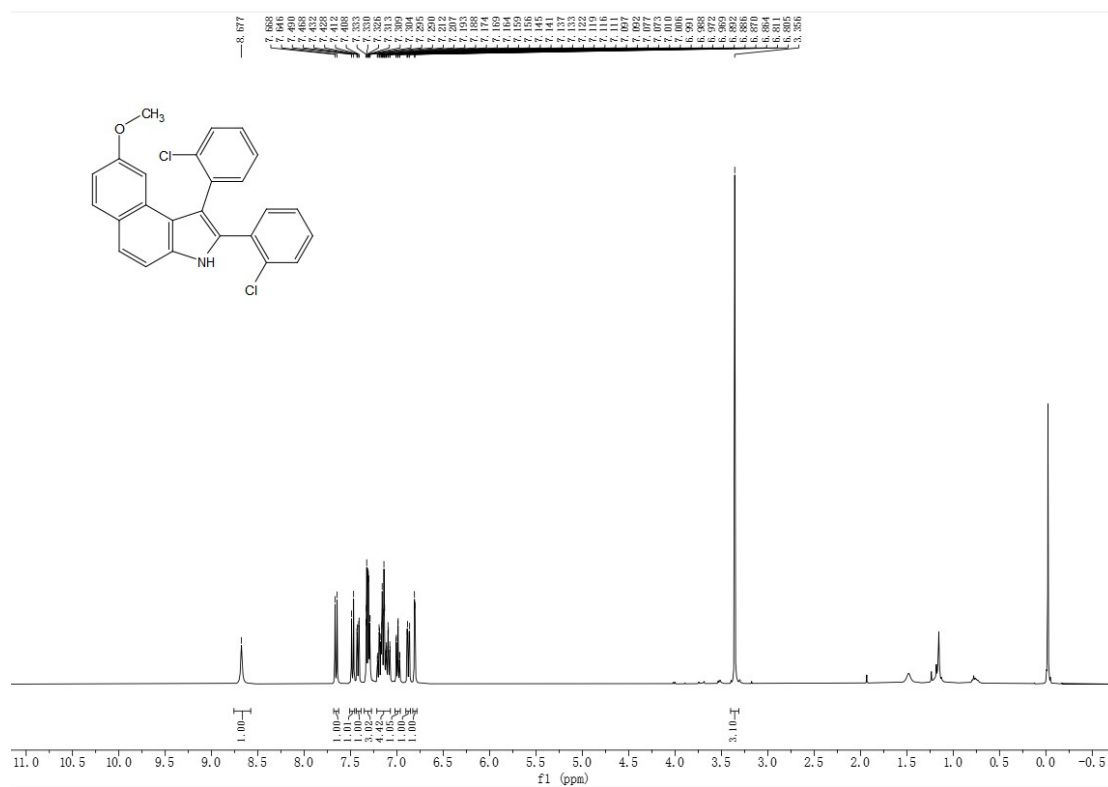

**<sup>13</sup>C NMR spectrum of 3bl (101 MHz, CDCl<sub>3</sub>)**

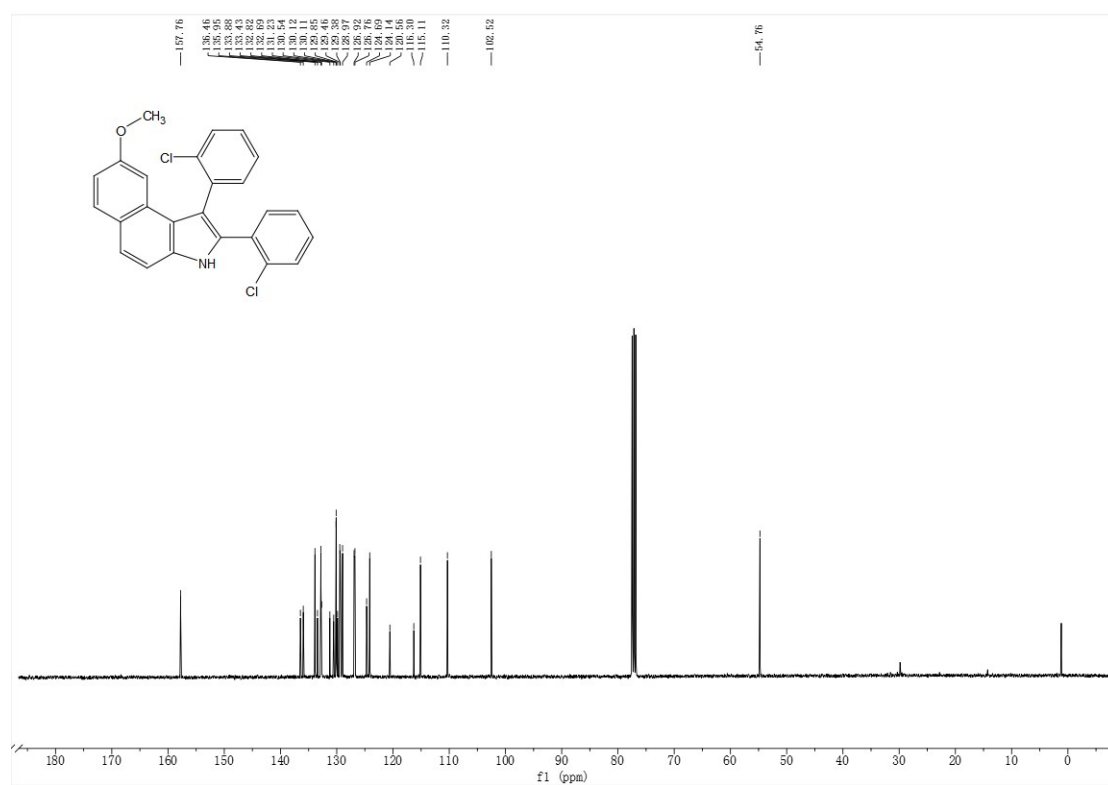

**<sup>1</sup>H NMR spectrum of 3bm (400 MHz, CDCl<sub>3</sub>)**

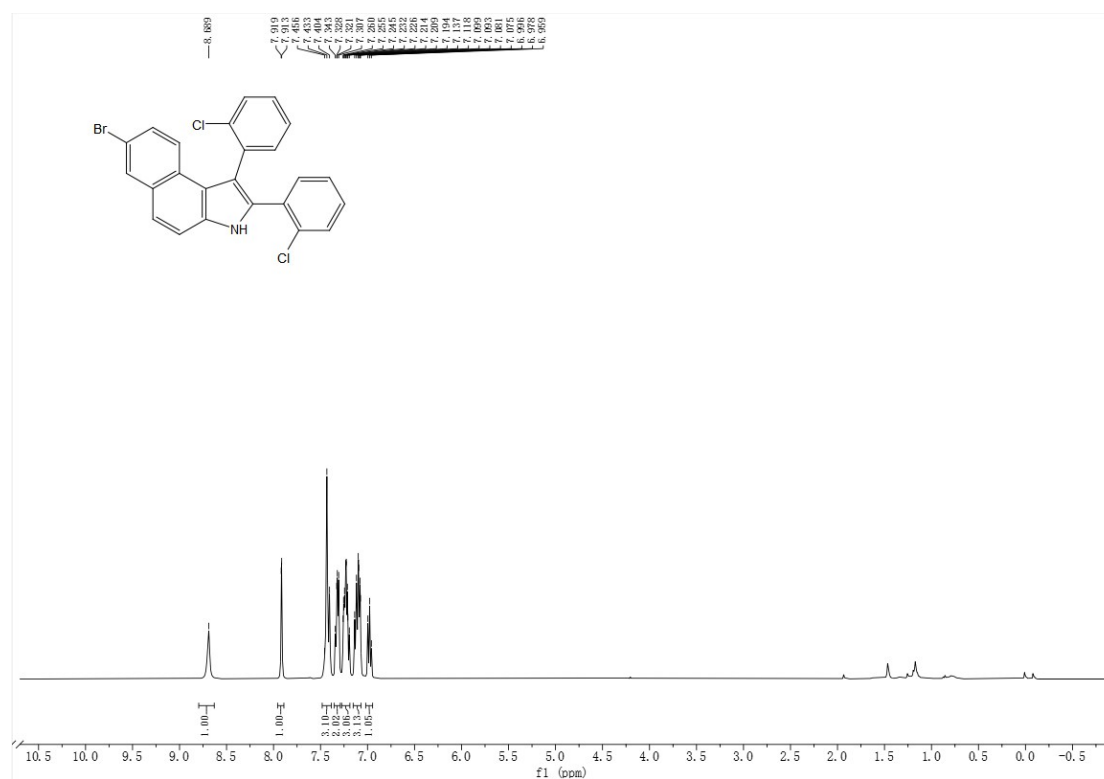

**<sup>13</sup>C NMR spectrum of 3bm (101 MHz, CDCl<sub>3</sub>)**

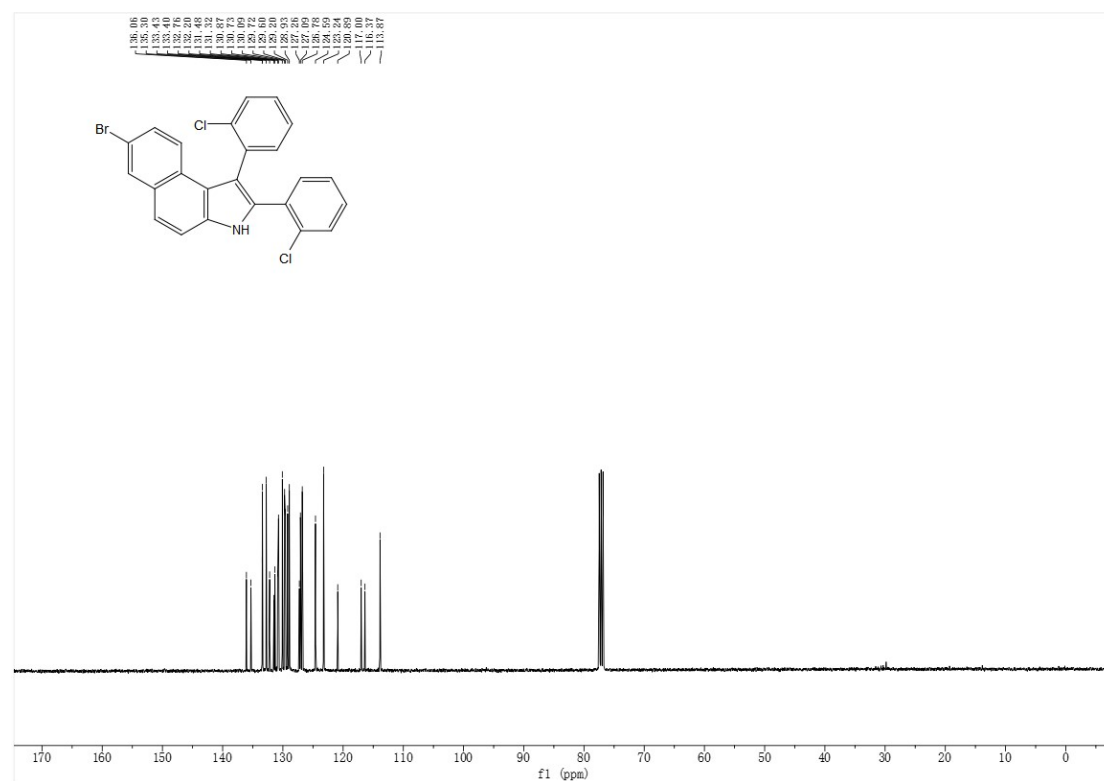

**<sup>1</sup>H NMR spectrum of 3bn (400 MHz, DMSO-d<sub>6</sub>)**

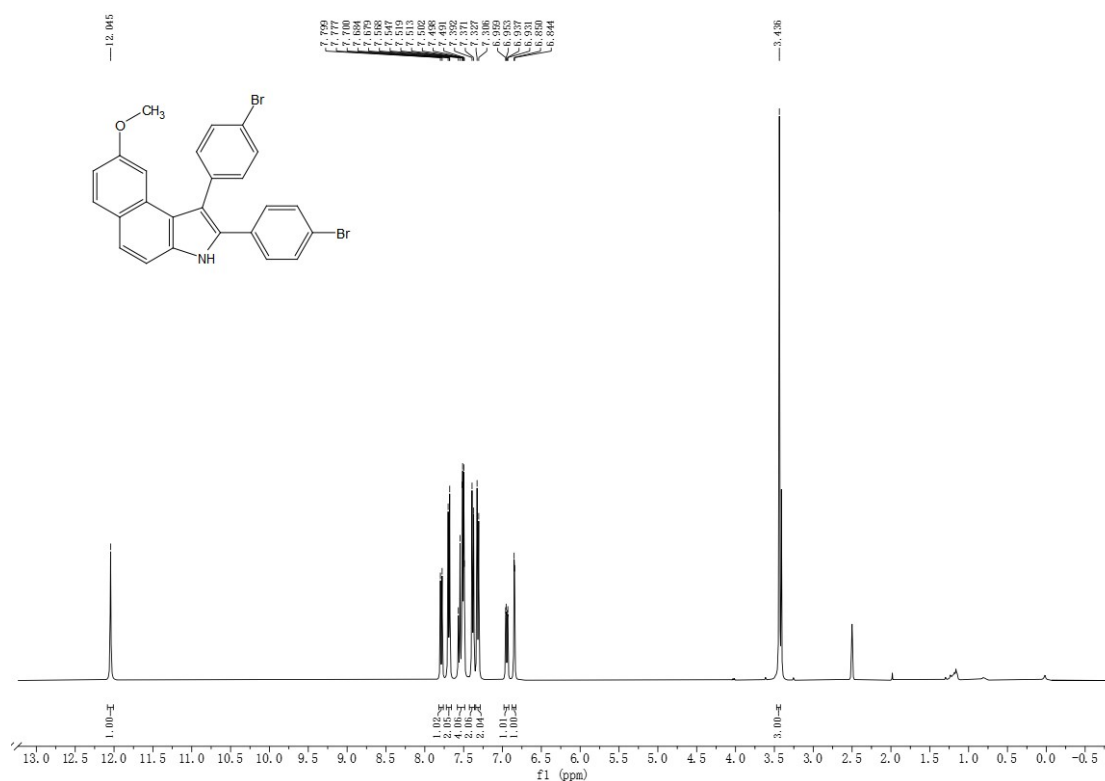

**<sup>13</sup>C NMR spectrum of 3bn (101 MHz, DMSO-d<sub>6</sub>)**

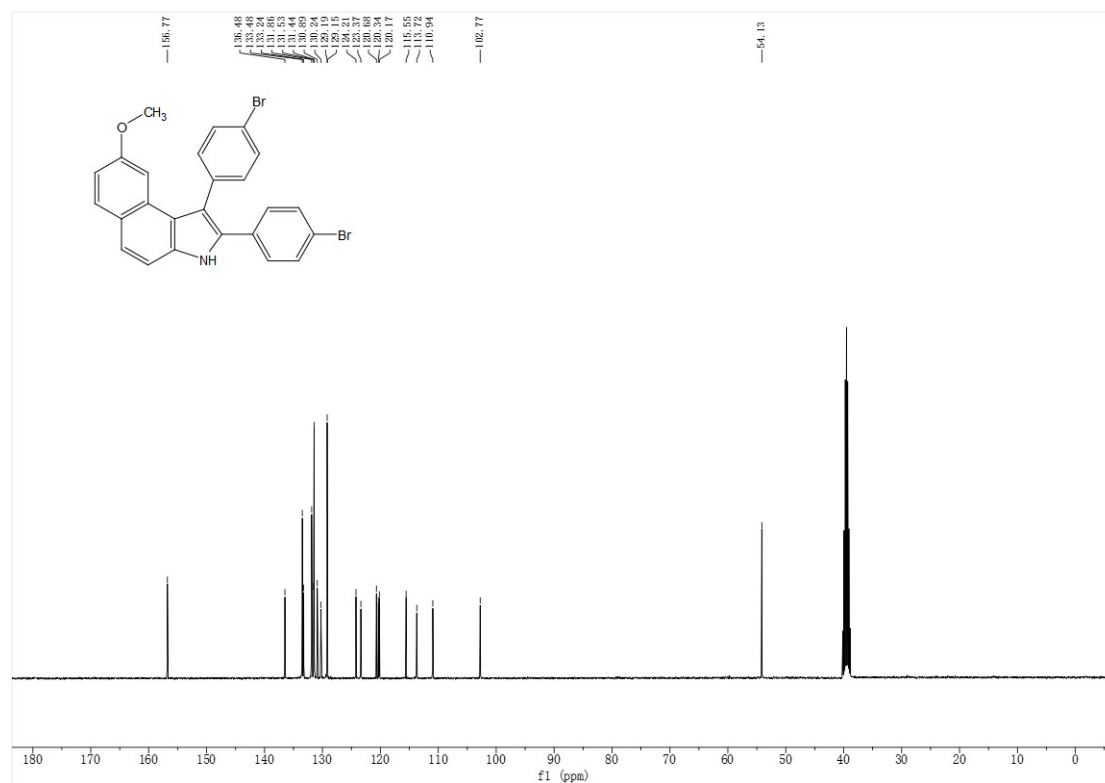

**<sup>1</sup>H NMR spectrum of 3bo (400 MHz, CDCl<sub>3</sub>)**

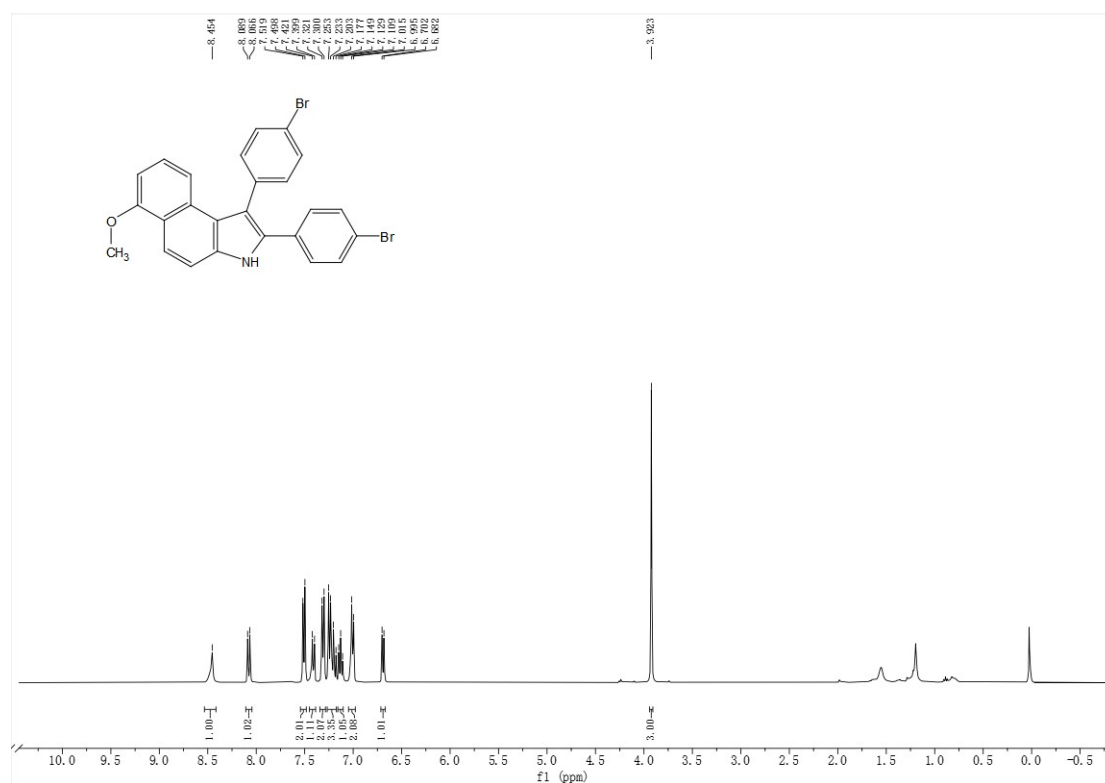

**<sup>13</sup>C NMR spectrum of 3bo (101 MHz, CDCl<sub>3</sub>)**

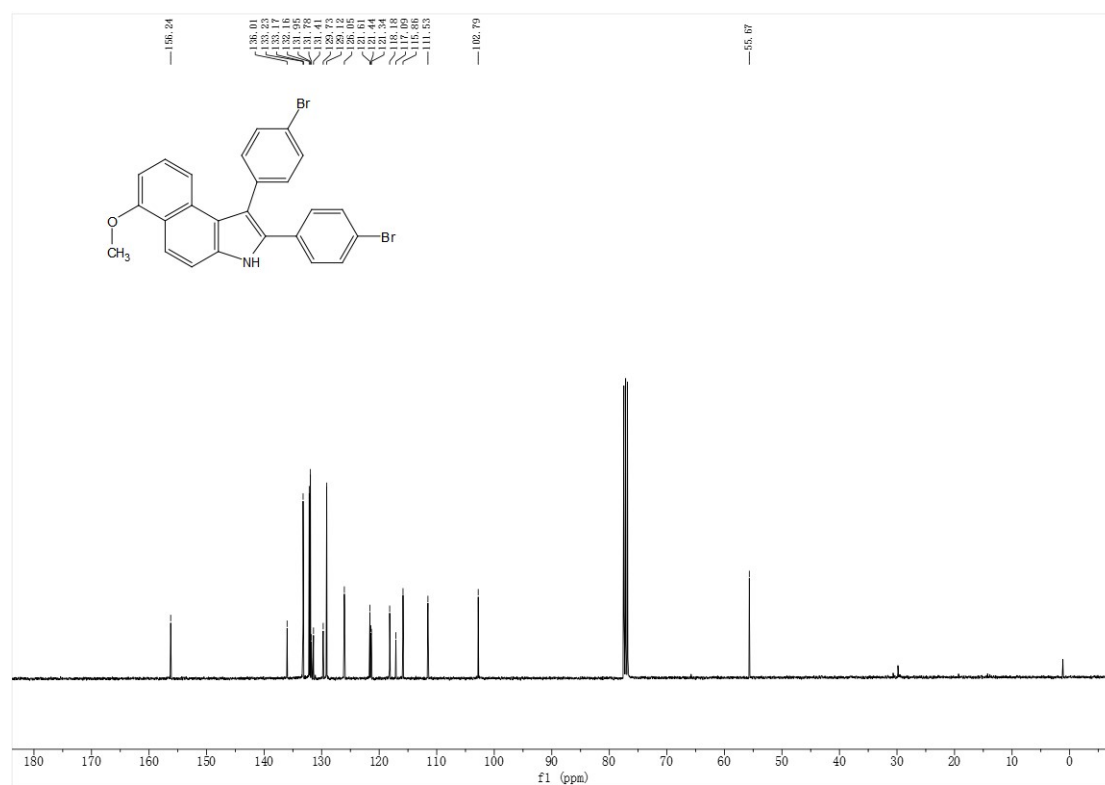



**<sup>1</sup>H NMR spectrum of 3bq (400 MHz, CDCl<sub>3</sub>)**

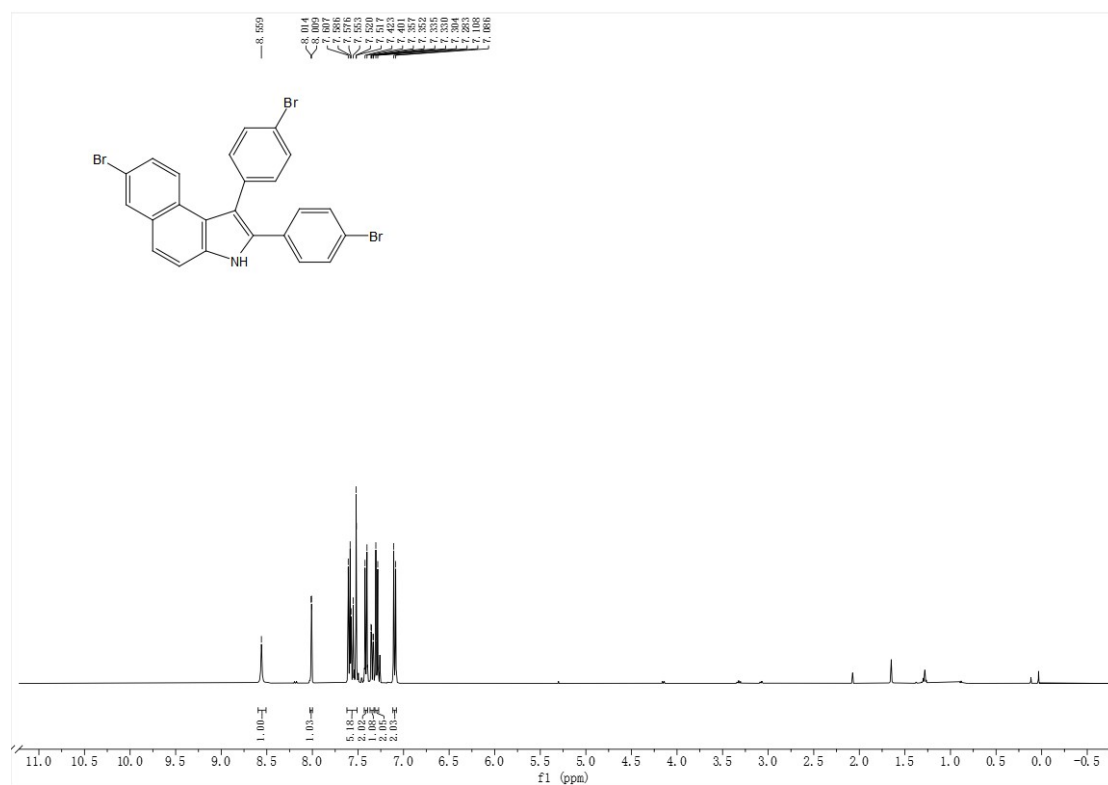

**<sup>13</sup>C NMR spectrum of 3bq (101 MHz, CDCl<sub>3</sub>)**

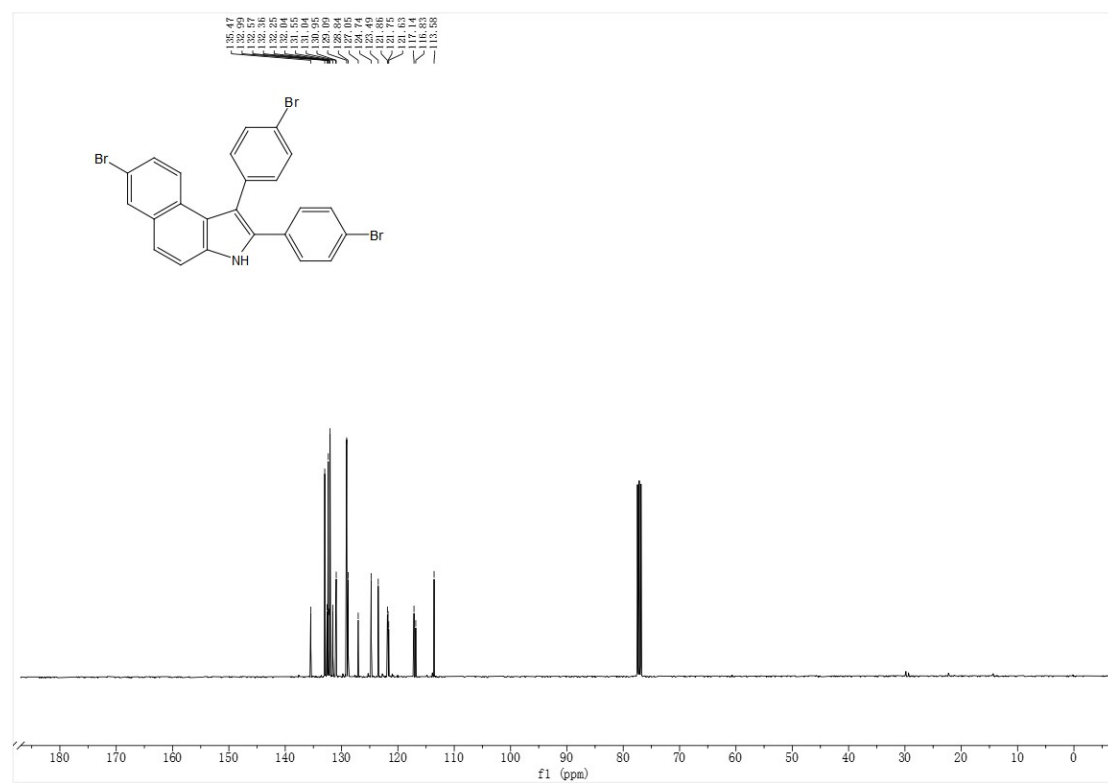

**<sup>1</sup>H NMR spectrum of 3br (400 MHz, CDCl<sub>3</sub>)**

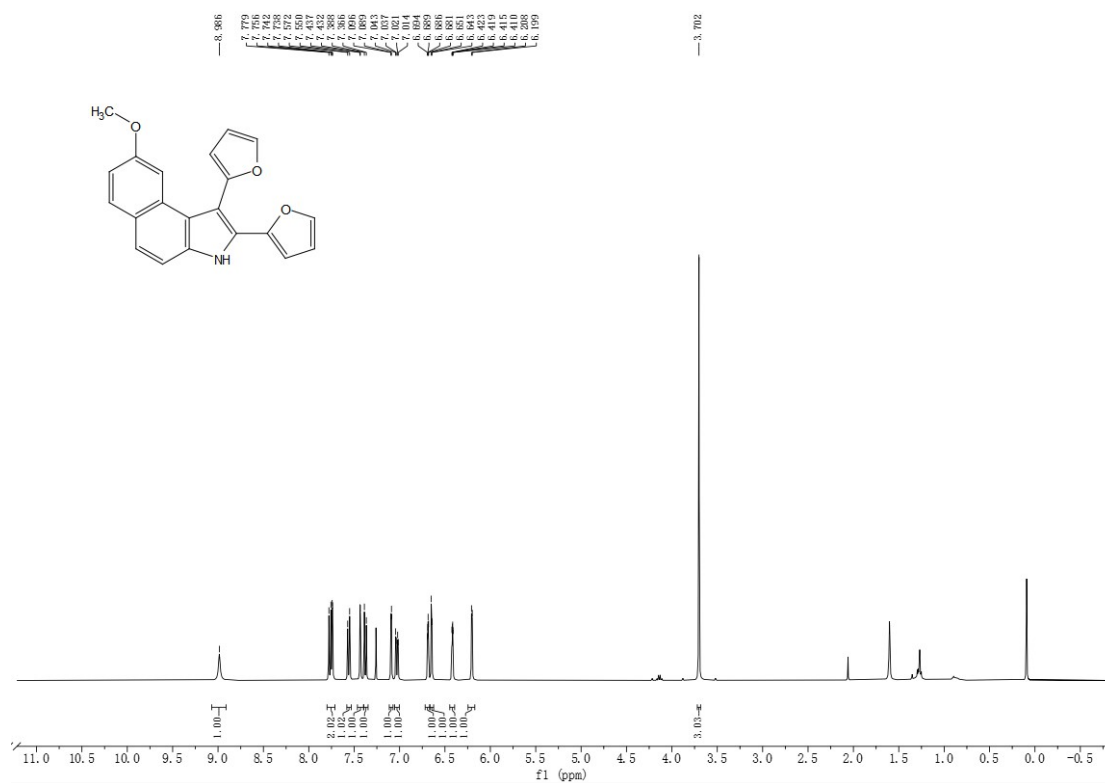

**<sup>13</sup>C NMR spectrum of 3br (101 MHz, CDCl<sub>3</sub>)**

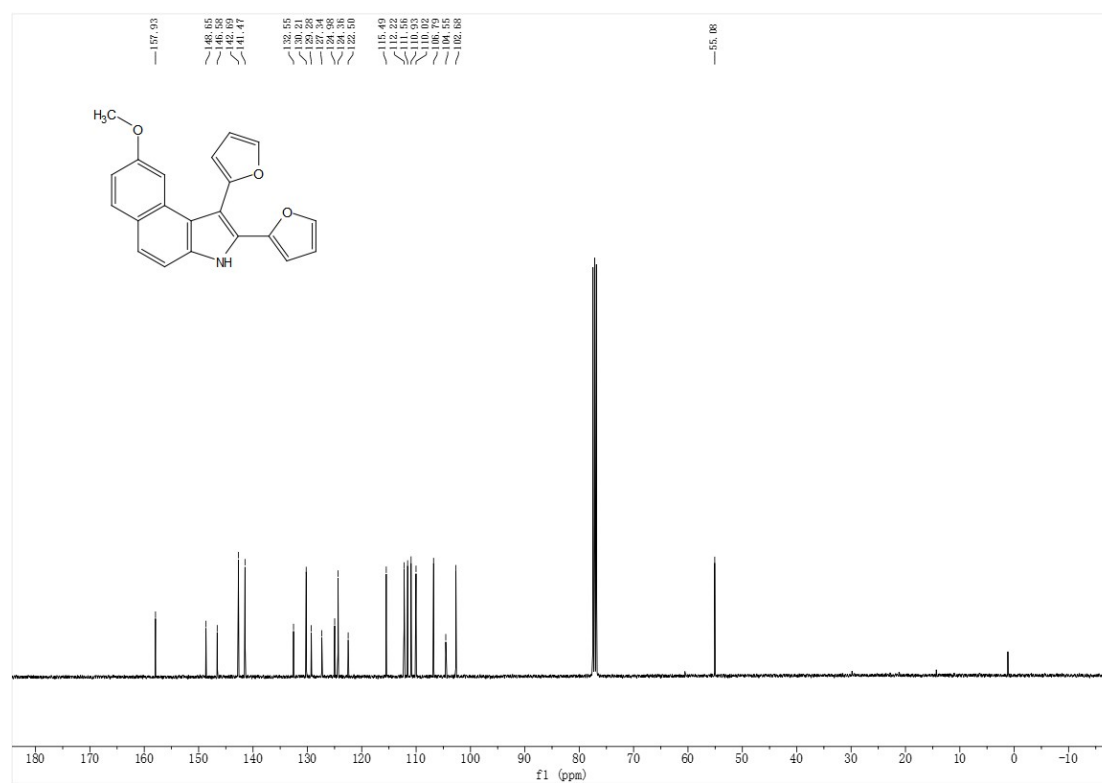



$^1\text{H}$  NMR spectrum of **3bt** (400 MHz,  $\text{CDCl}_3$ )

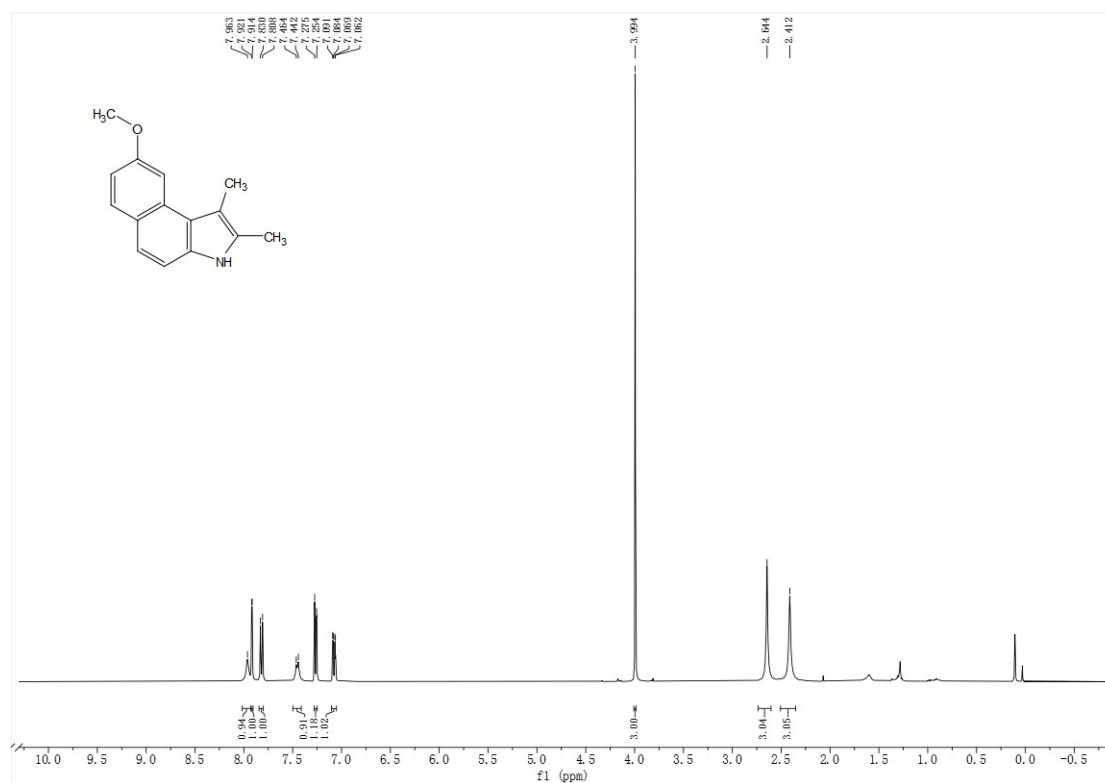

$^{13}\text{C}$  NMR spectrum of **3bt** (101 MHz,  $\text{CDCl}_3$ )

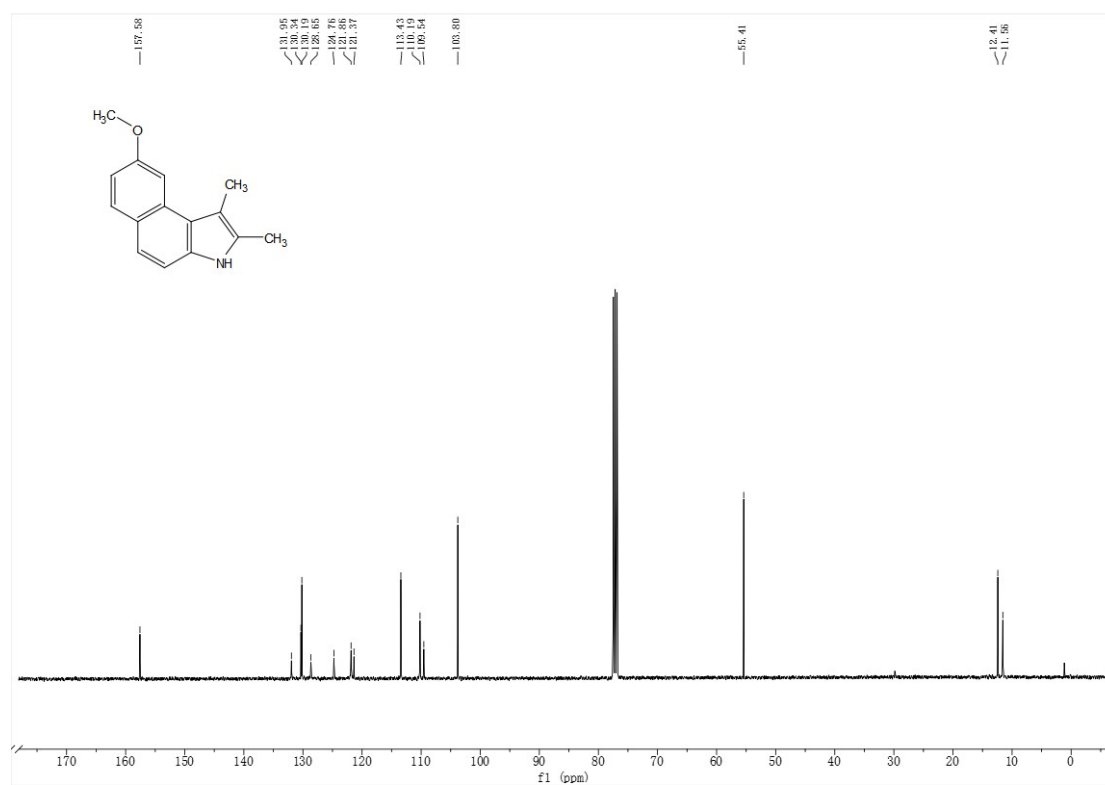

**<sup>1</sup>H NMR spectrum of 3bu (400 MHz, CDCl<sub>3</sub>)**

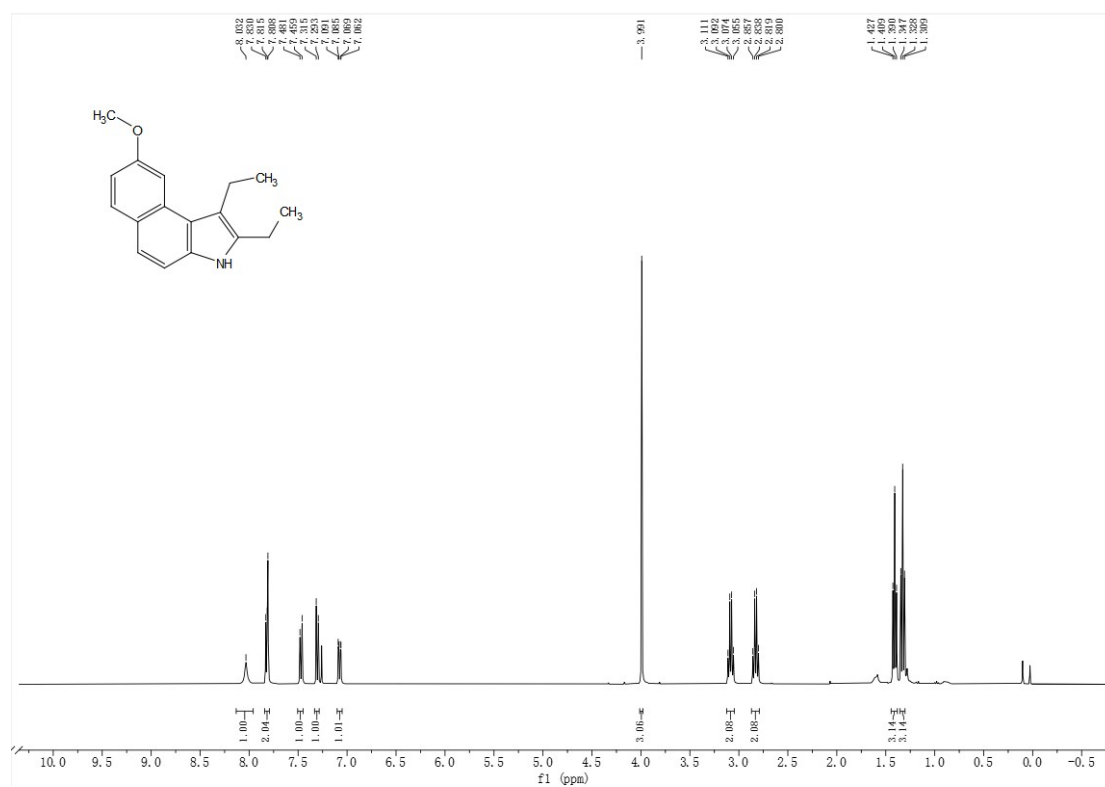

**<sup>13</sup>C NMR spectrum of 3bu (101 MHz, CDCl<sub>3</sub>)**

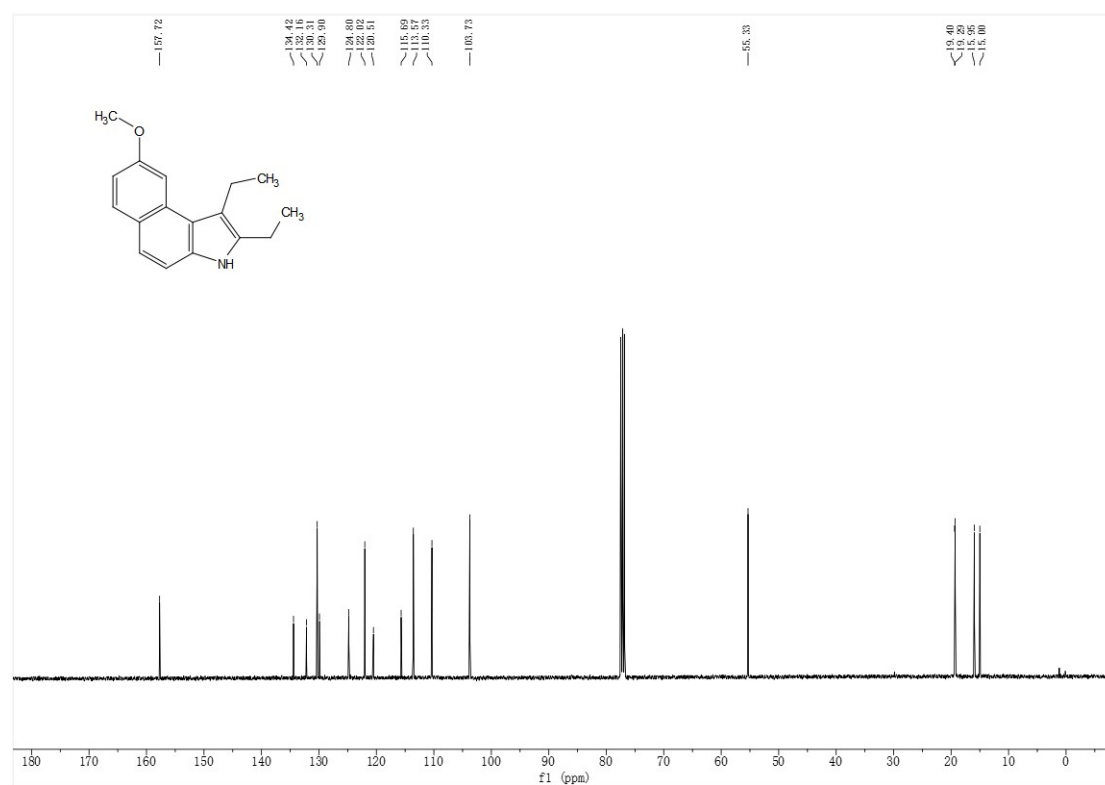



**<sup>1</sup>H NMR spectrum of 3bv' (400 MHz, CDCl<sub>3</sub>)**

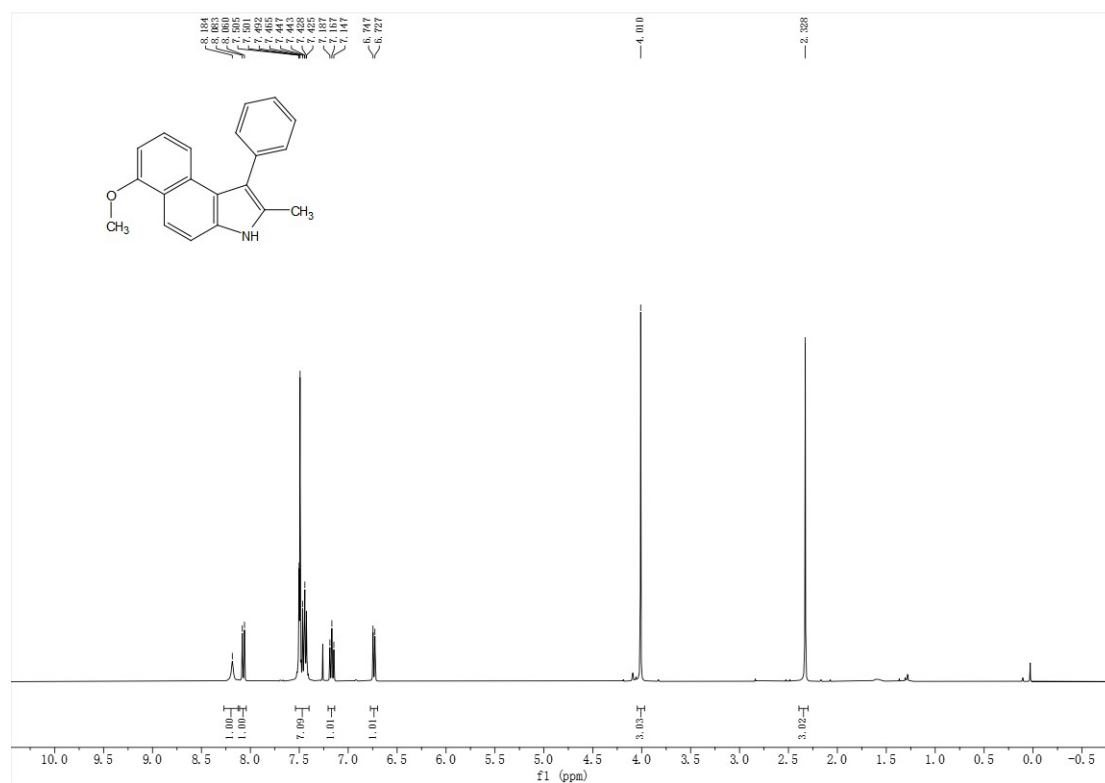

**<sup>13</sup>C NMR spectrum of 3bv' (101 MHz, CDCl<sub>3</sub>)**

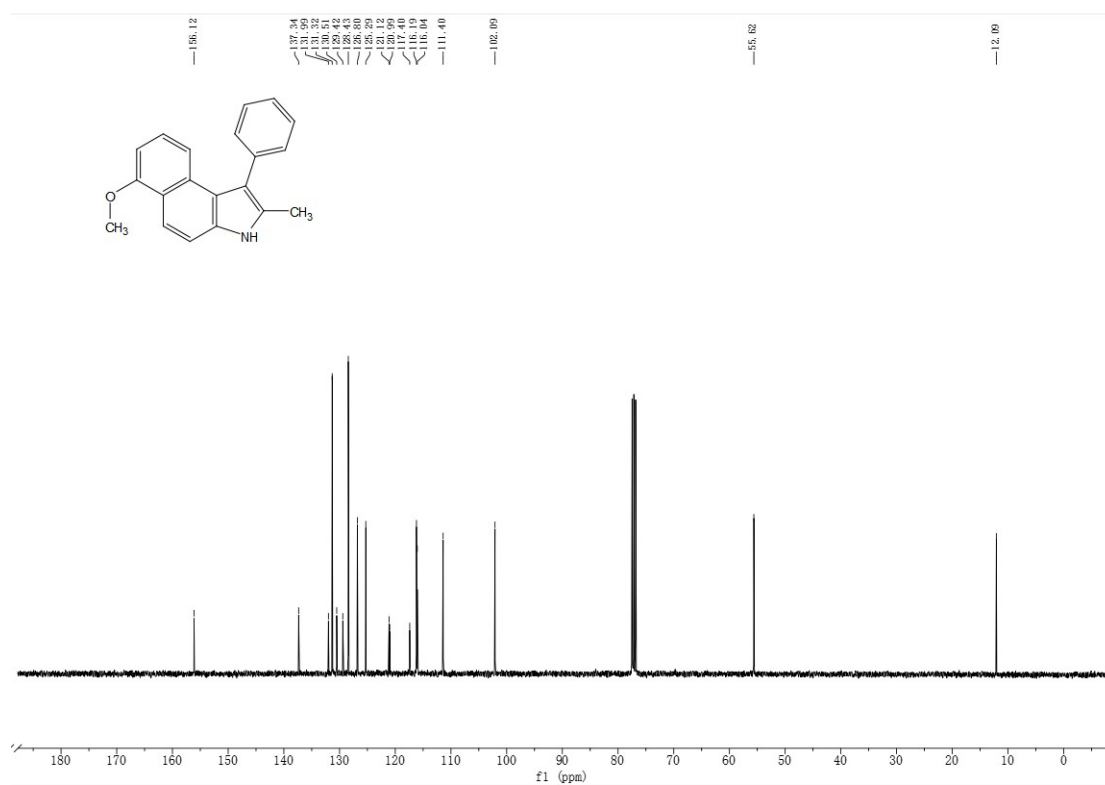

**<sup>1</sup>H NMR spectrum of 3bw (400 MHz, CDCl<sub>3</sub>)**

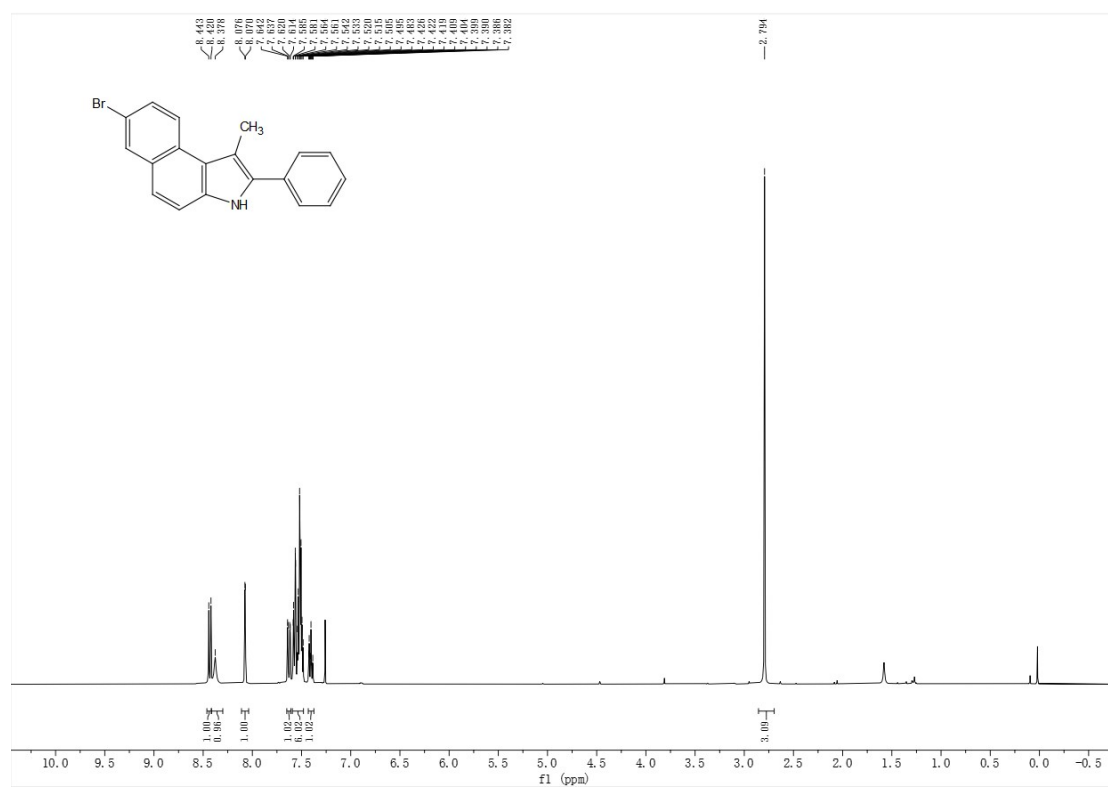

**<sup>13</sup>C NMR spectrum of 3bw (101 MHz, CDCl<sub>3</sub>)**

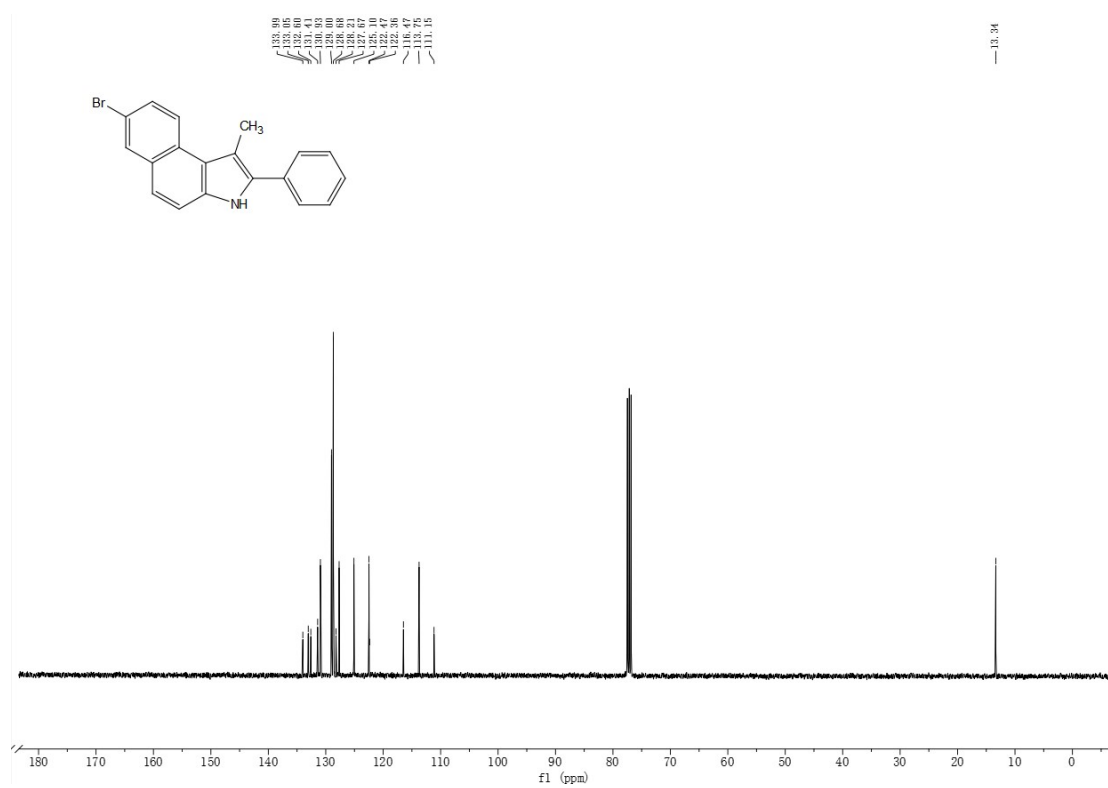

<sup>1</sup>H NMR spectrum of **3bw'** (400 MHz, CDCl<sub>3</sub>)

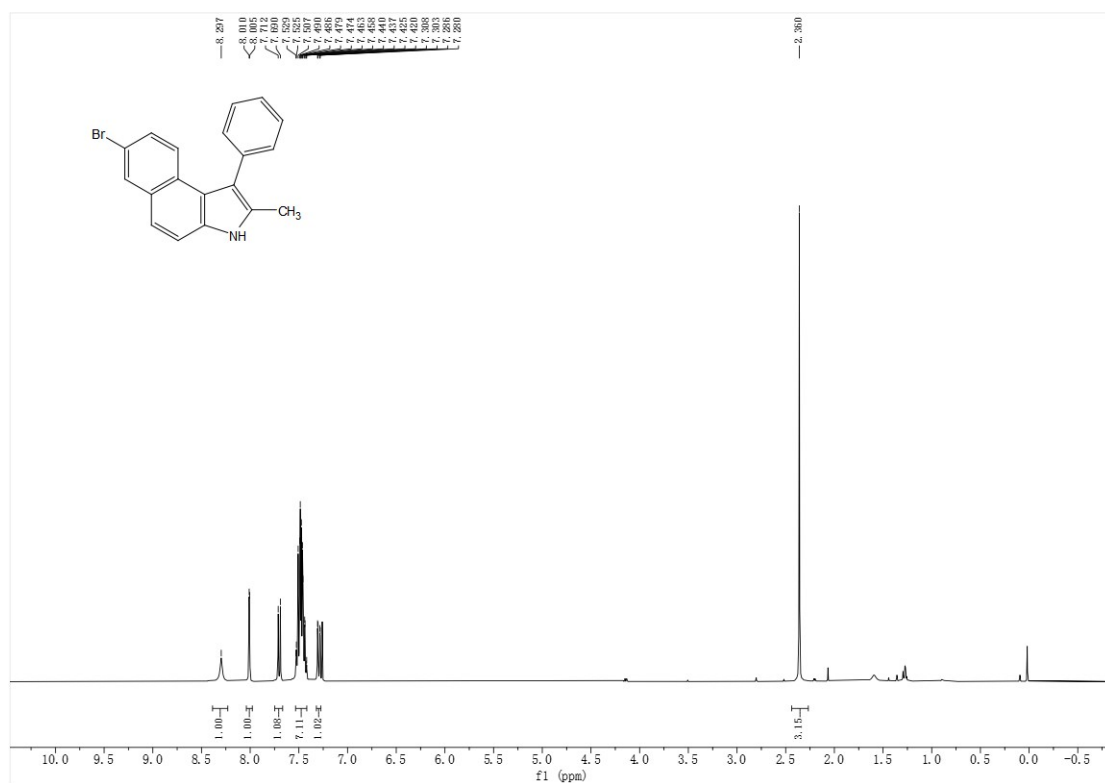

<sup>13</sup>C NMR spectrum of **3bw'** (101 MHz, CDCl<sub>3</sub>)

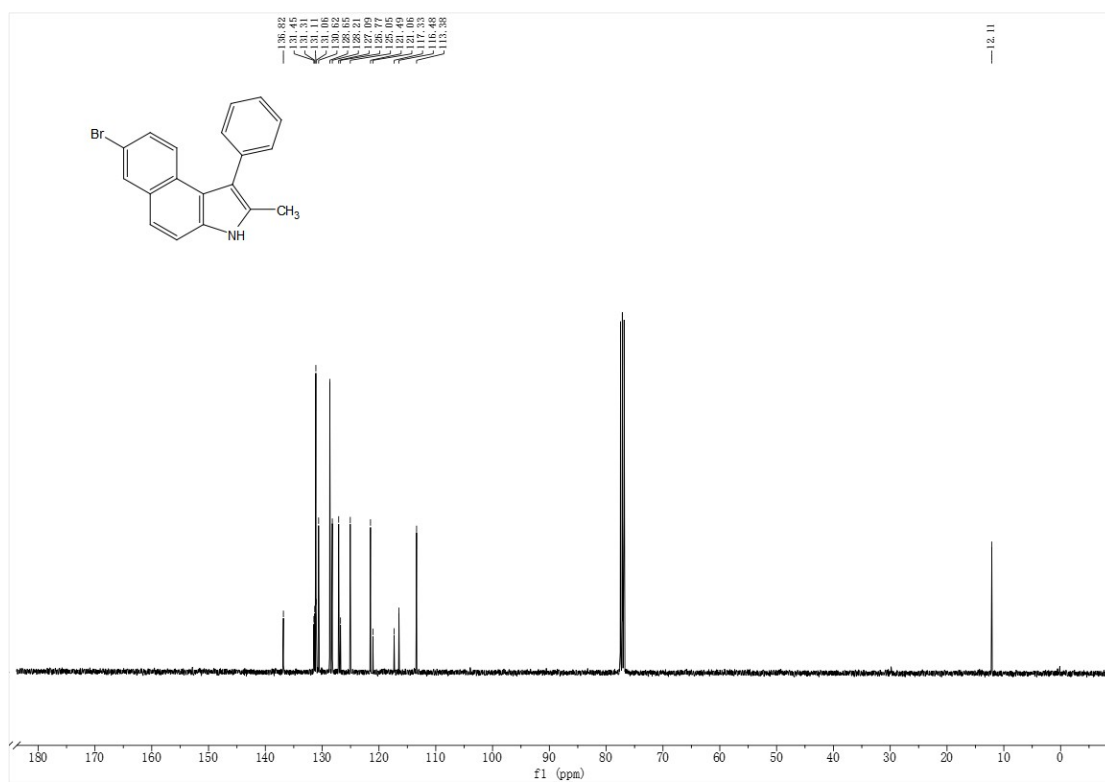

**<sup>1</sup>H NMR spectrum of 4a (400 MHz, CDCl<sub>3</sub>)**

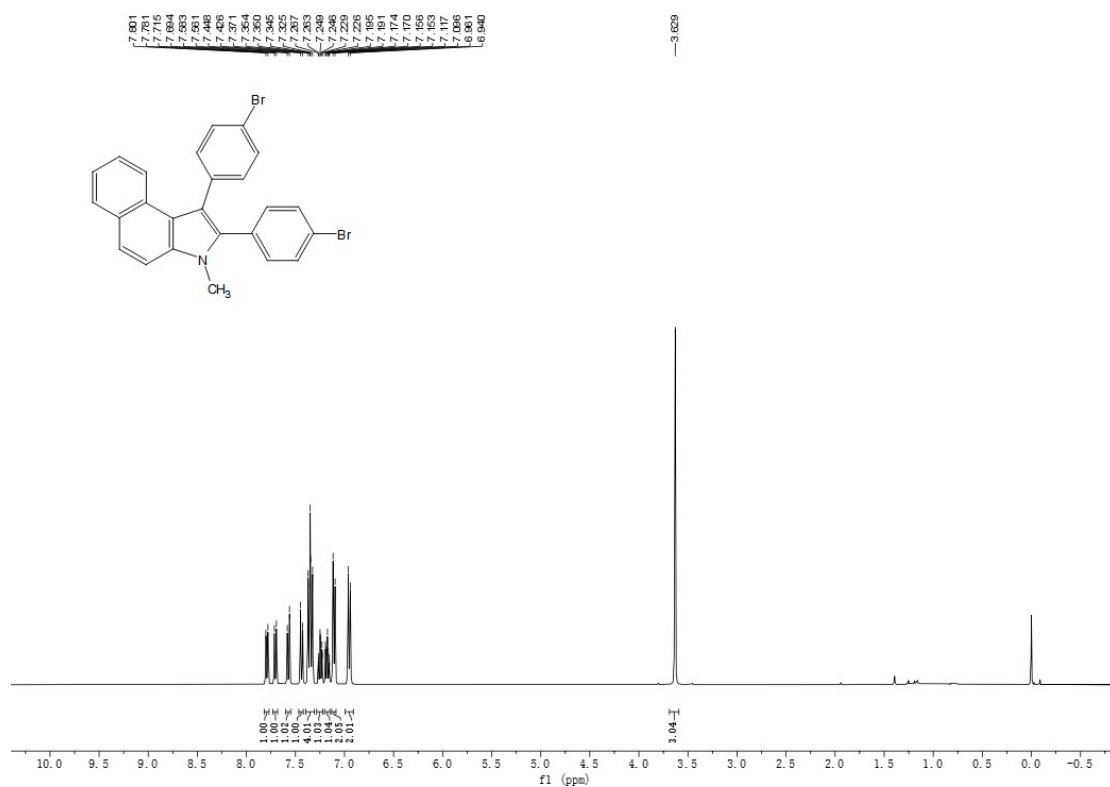

**<sup>13</sup>C NMR spectrum of 4a (101 MHz, CDCl<sub>3</sub>)**

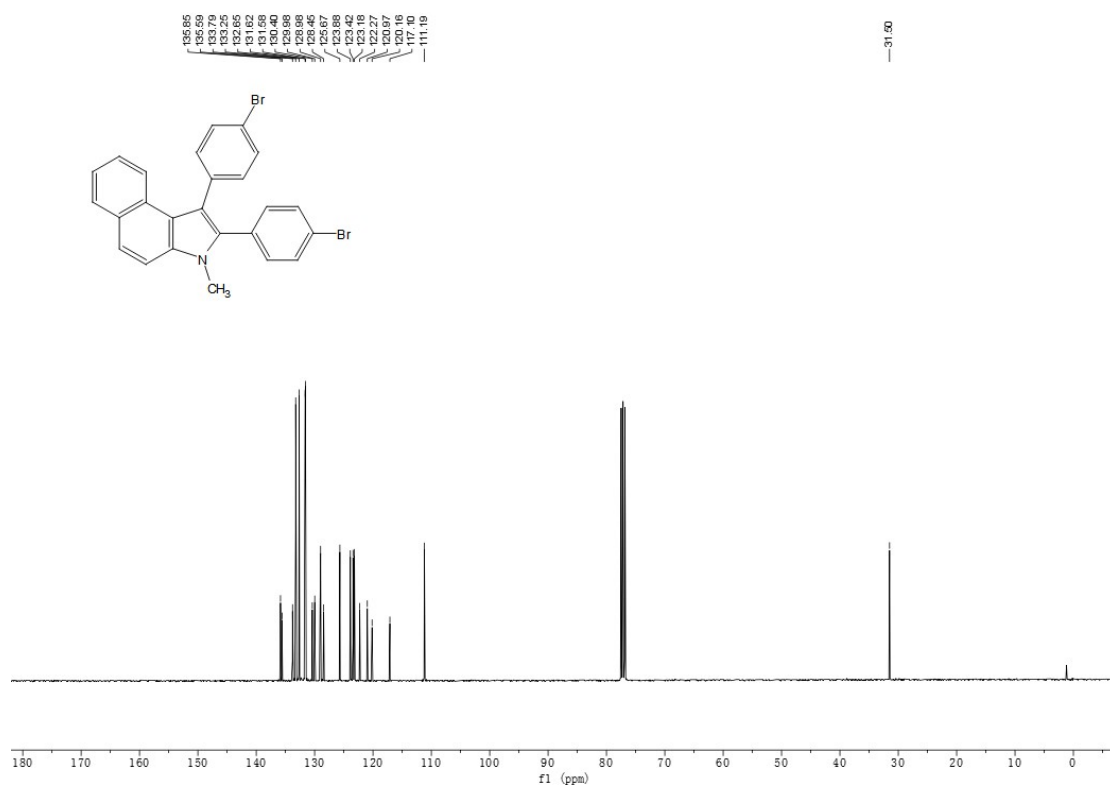

**<sup>1</sup>H NMR spectrum of 4b (400 MHz, CDCl<sub>3</sub>)**

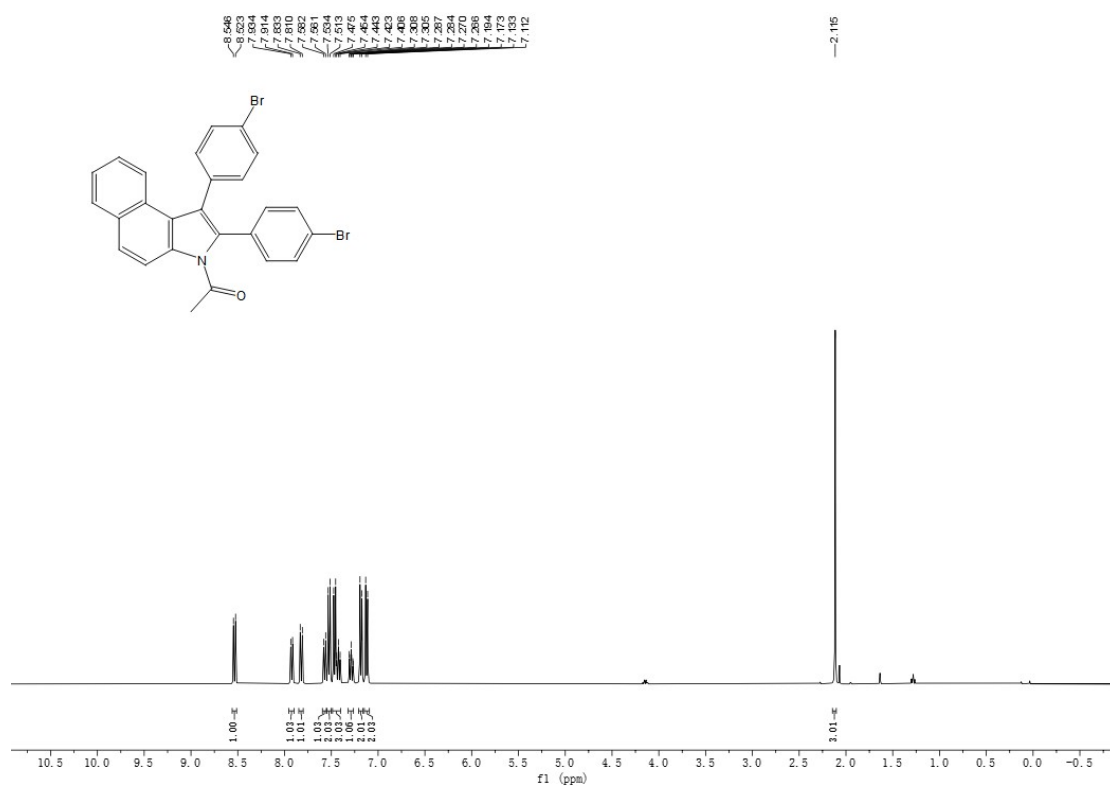

**<sup>13</sup>C NMR spectrum of 4b (101 MHz, CDCl<sub>3</sub>)**

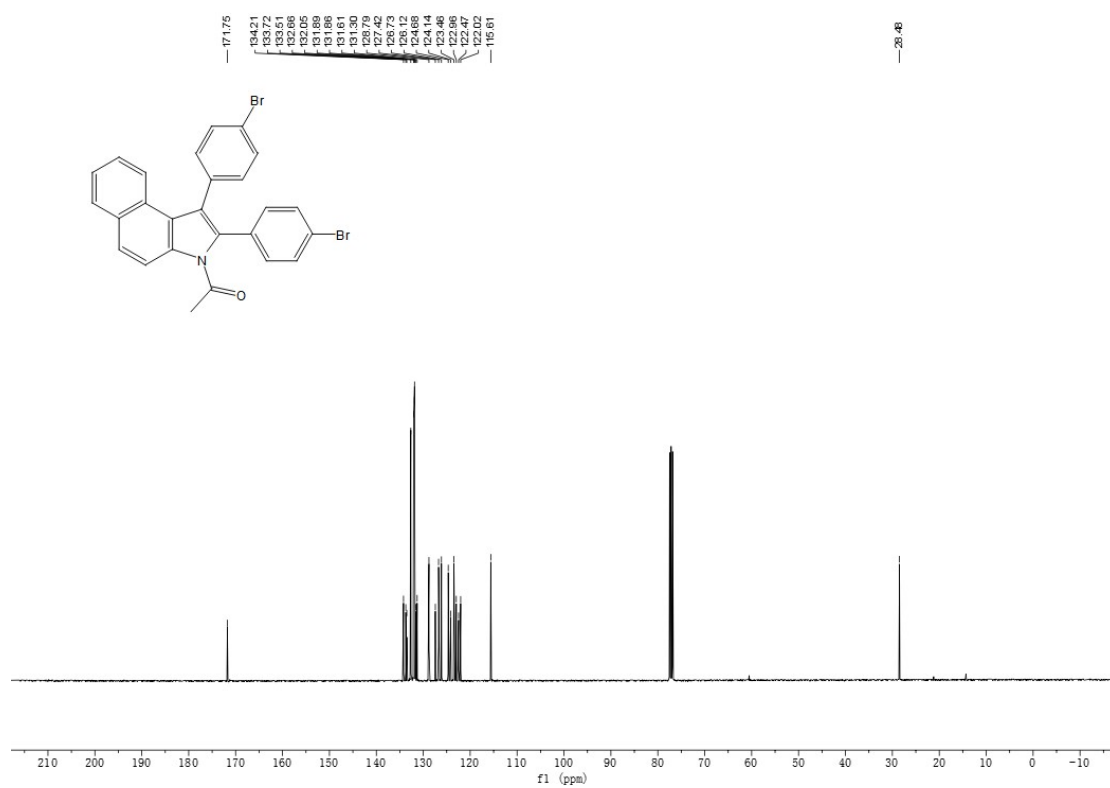

## 6. UV-vis absorption and fluorescence emission spectra

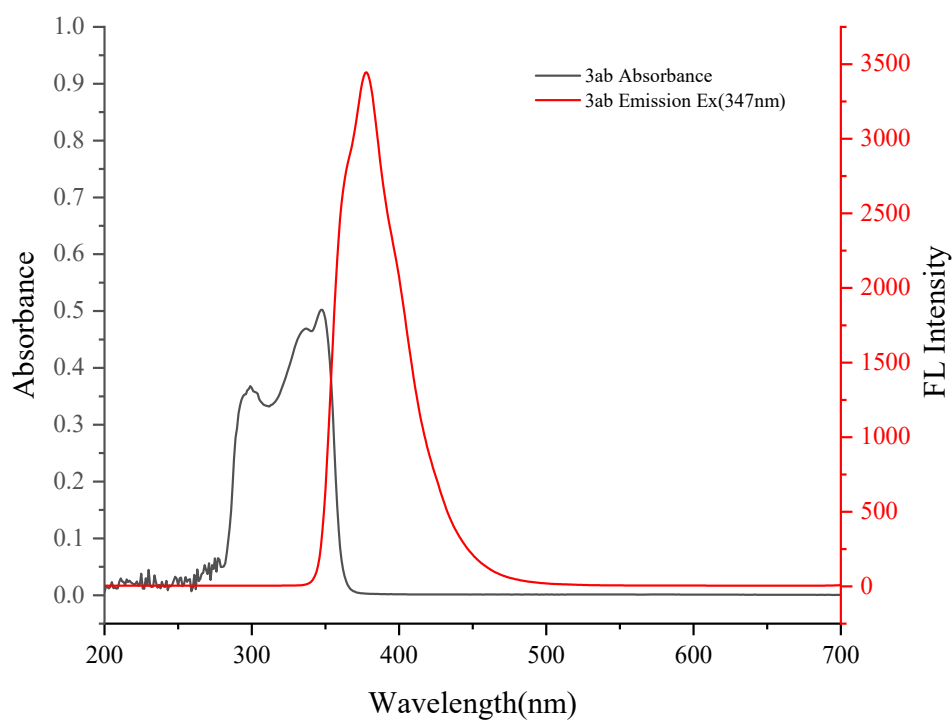

Figure S1. UV-vis absorption and fluorescence emission spectra of **3ab** in MeOH at RT ( $10^{-5}$  M).

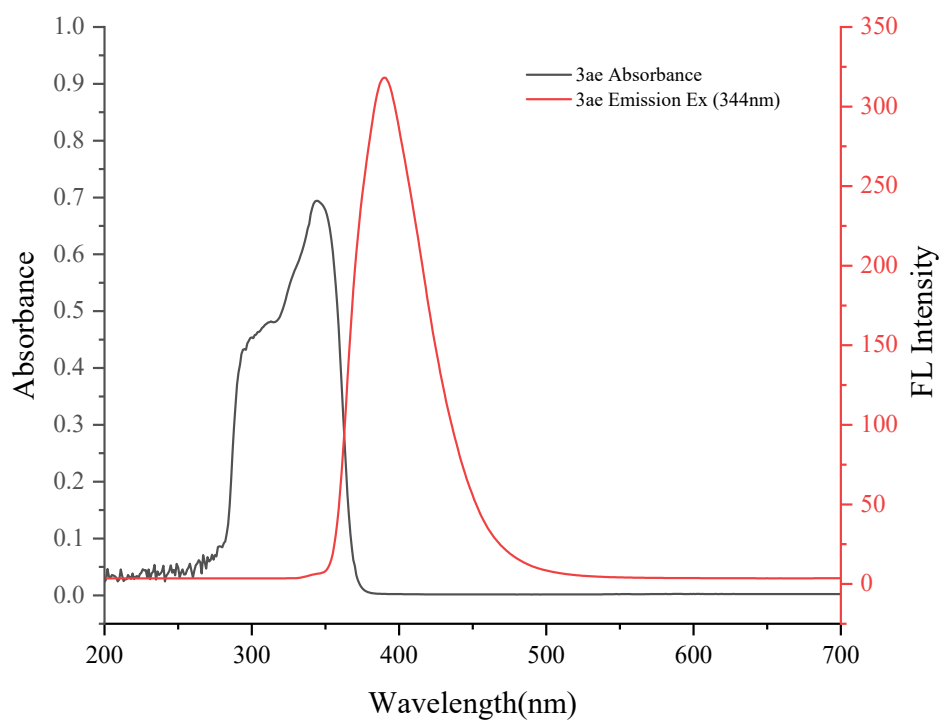

Figure S2. UV-vis absorption and fluorescence emission spectra of **3ae** in MeOH at RT ( $10^{-5}$  M).

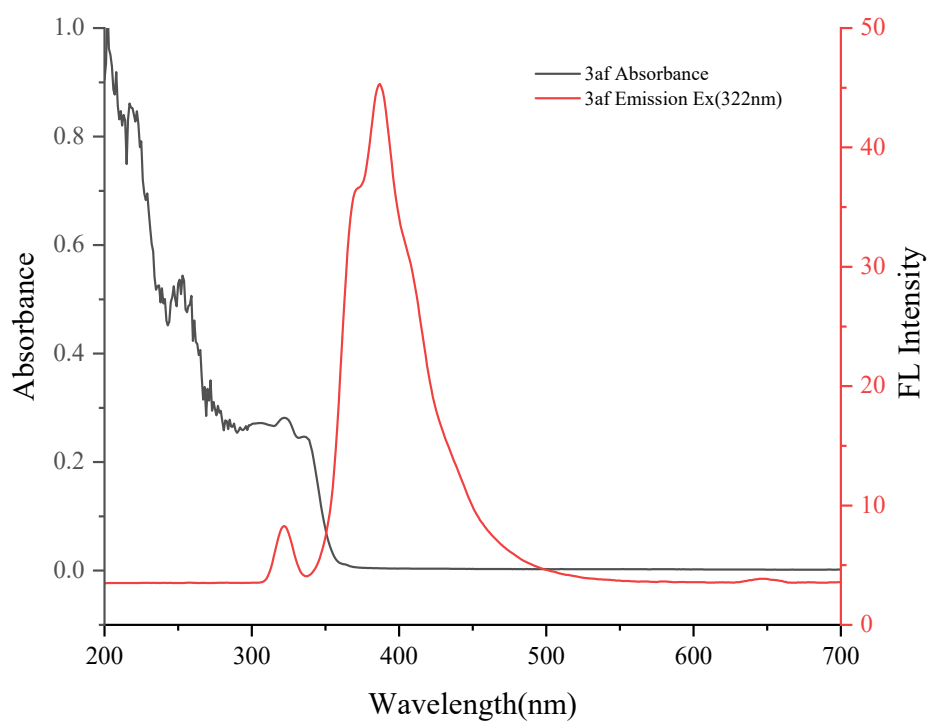

Figure S3. UV-vis absorption and fluorescence emission spectra of **3af** in MeOH at RT (10<sup>-5</sup> M).

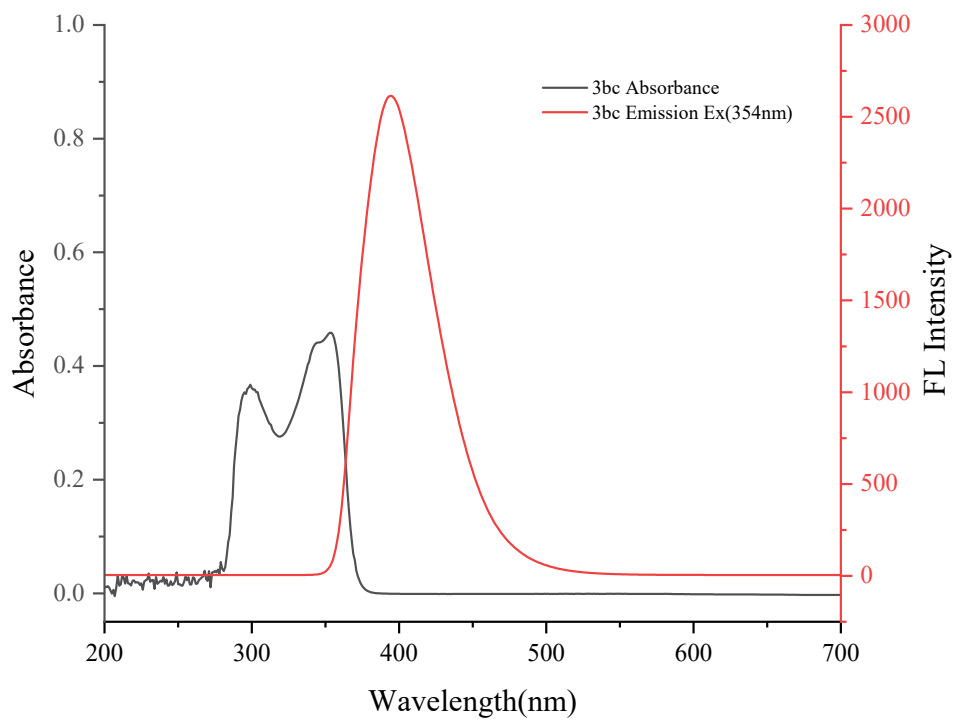

Figure S4. UV-vis absorption and fluorescence emission spectra of **3bc** in MeOH at RT (10<sup>-5</sup> M).

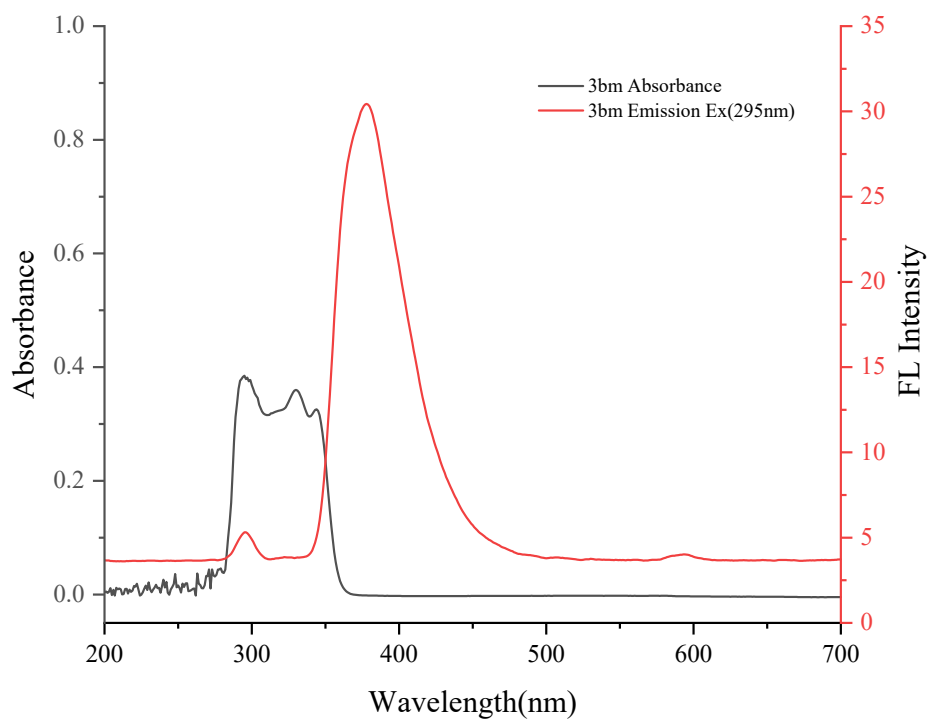

Figure S5. UV-vis absorption and fluorescence emission spectra of **3bm** in MeOH at RT ( $10^{-5}$  M).

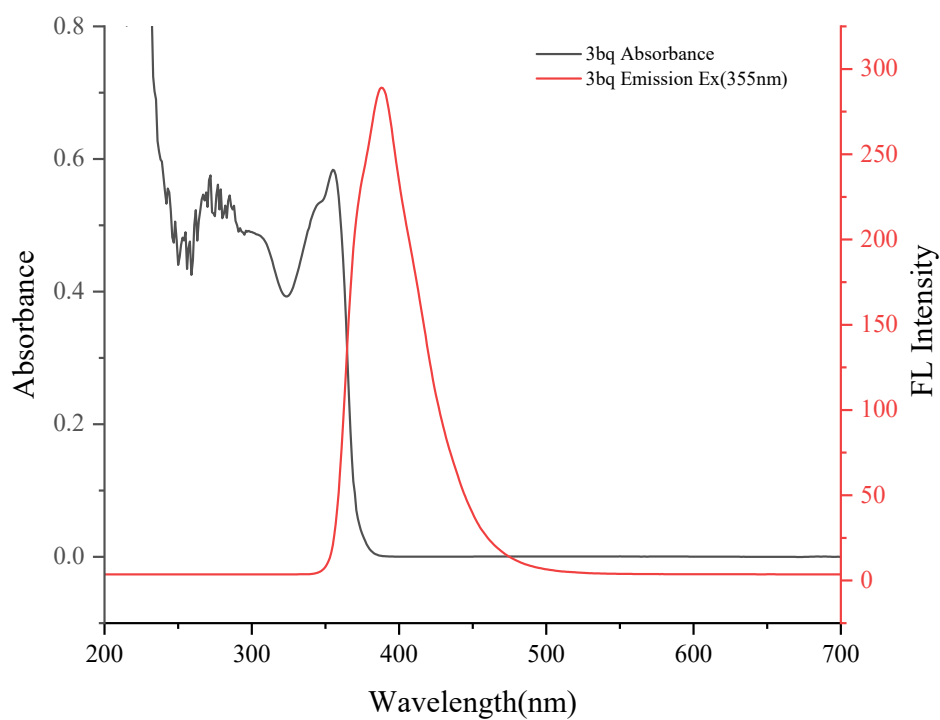

Figure S6. UV-vis absorption and fluorescence emission spectra of **3bq** in MeOH at RT ( $10^{-5}$  M).

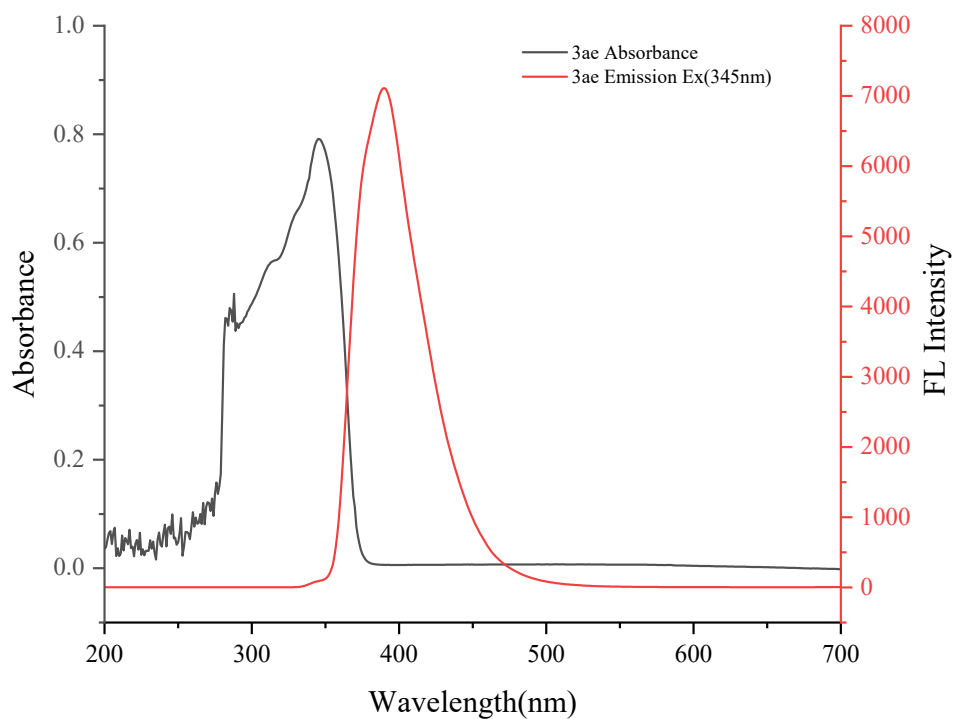

Figure S7. UV-vis absorption and fluorescence emission spectra of **3ae** in toluene at RT ( $10^{-5}$  M).

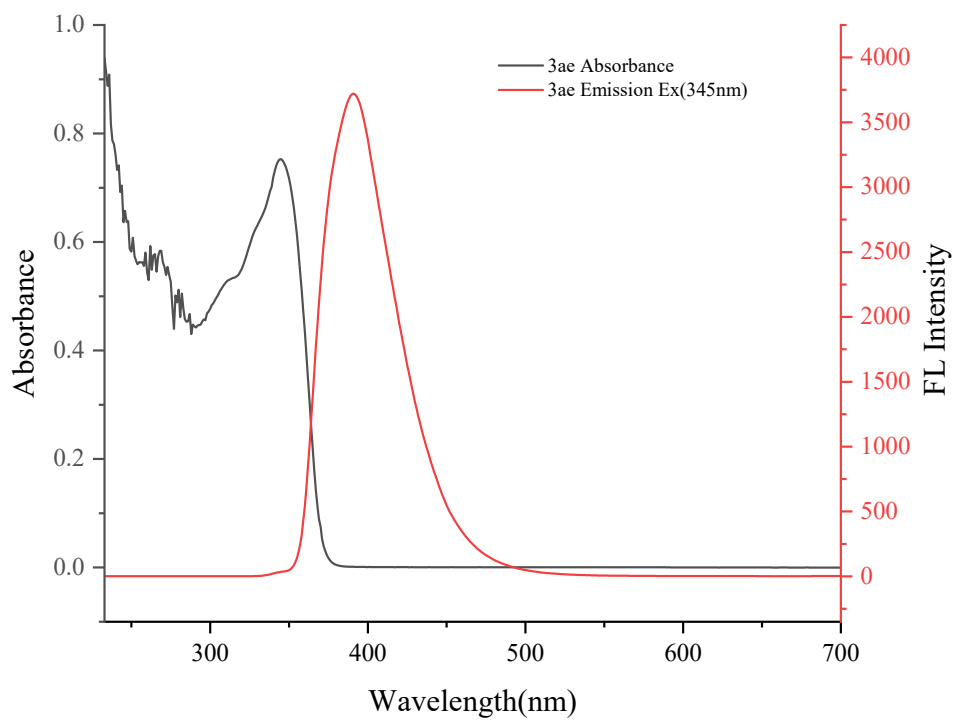

Figure S8. UV-vis absorption and fluorescence emission spectra of **3ae** in DCM at RT ( $10^{-5}$  M).

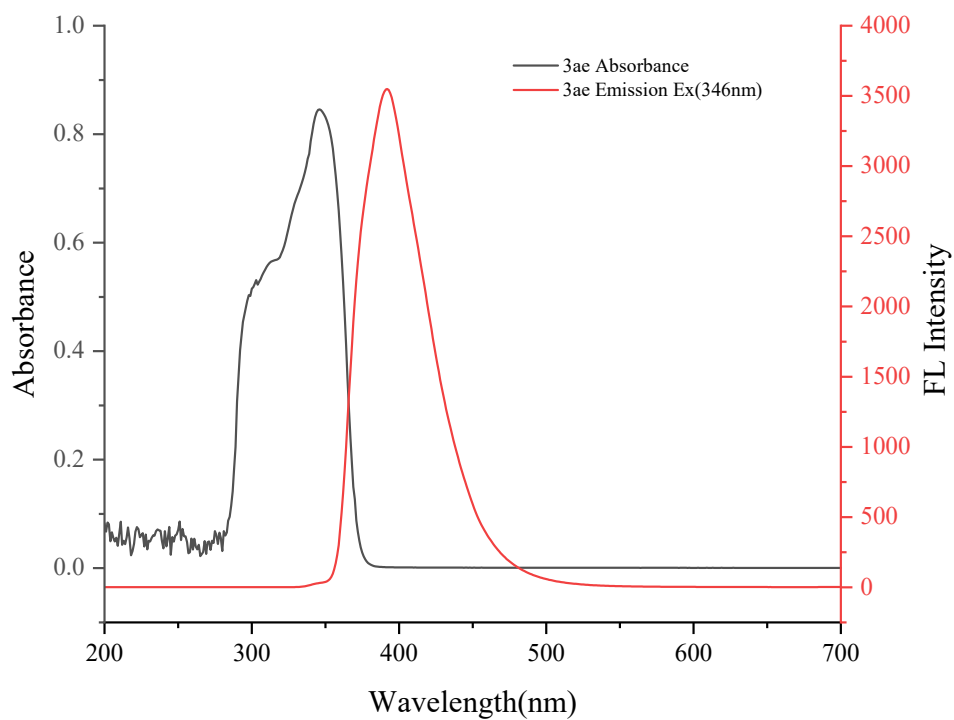

Figure S9. UV-vis absorption and fluorescence emission spectra of **3ae** in THF at RT ( $10^{-5}$  M).

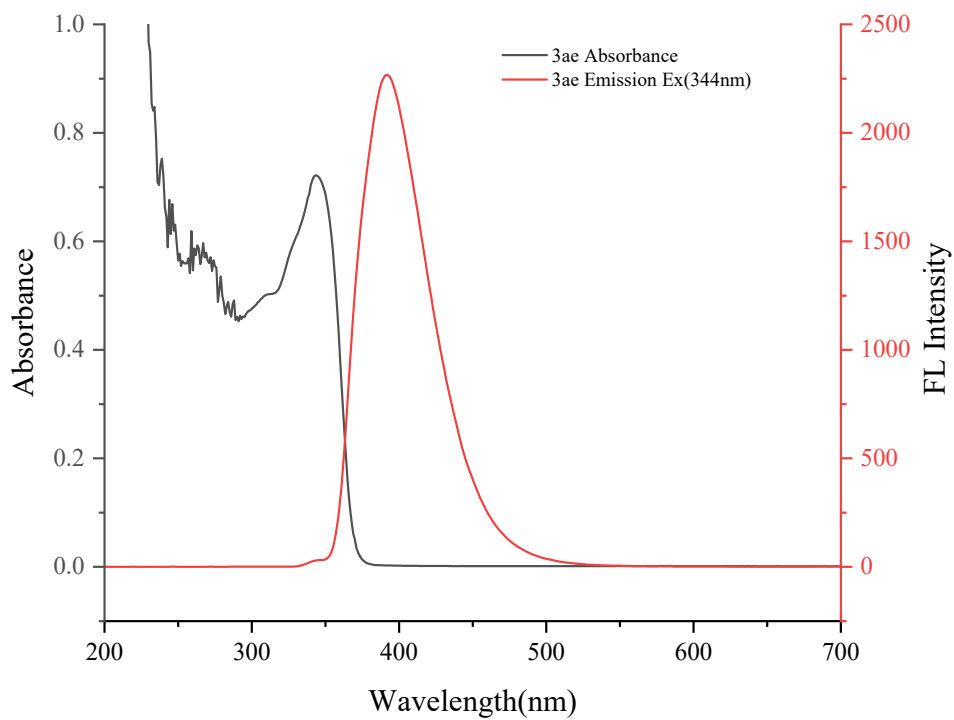

Figure S10. UV-vis absorption and fluorescence emission spectra of **3ae** in MeCN at RT ( $10^{-5}$  M).

## 7. HRMS of the imine/enamine intermediate

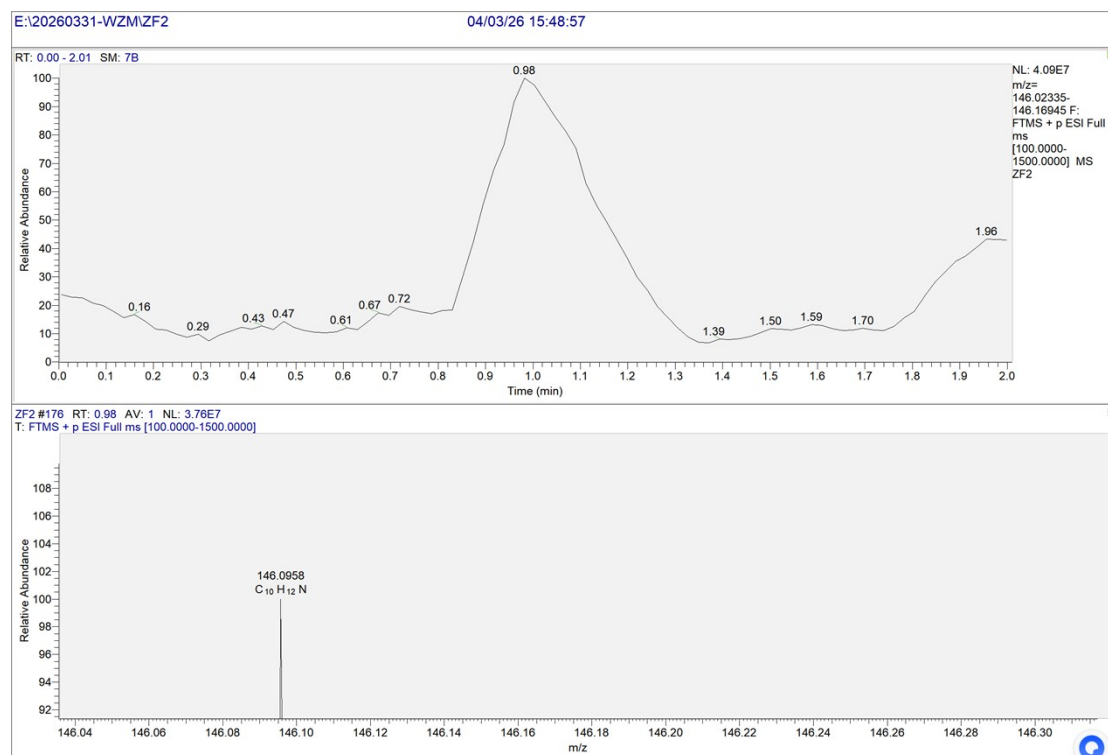

Figure S11. The picture of HRMS of the imine/enamine intermediate (the reaction of 2-tetralone with NH<sub>4</sub>OAc within 10 min. Calcd. for C<sub>10</sub>H<sub>12</sub>N<sup>+</sup> (M+H)<sup>+</sup> 146.0964, found 146.0958)
